# Supplementary material for: Validation of risk assessment scales and predictors of intentions to quit smoking in Australian Aboriginal and Torres Strait Islander peoples: a cross-sectional survey protocol
Source: PubMed Central journal article supplement — BMJ Open. 2014 Jun 5;4(6):e004887. doi: 10.1136/bmjopen-2014-004887 (PMC4054635; doi:10.1136/bmjopen-2014-004887), 2014-06-05
Supplement: bmjopen-2014-004887.draft_revisions.pdf [file bmjopen-2014-004887.draft_revisions.pdf]

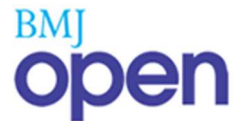

**STUDY PROTOCOL - VALIDATION OF RISK ASSESSMENT  
SCALES IN A CROSS-SECTIONAL SURVEY OF ATTITUDES TO  
TOBACCO SMOKING AND INTENTIONS TO QUIT SMOKING  
IN AUSTRALIAN ABORIGINAL AND TORRES STRAIT  
ISLANDERS.**

|                                 |                                                                                                                                                                                                                                                                                                                                                                                                                                                                                                                                                                                           |
|---------------------------------|-------------------------------------------------------------------------------------------------------------------------------------------------------------------------------------------------------------------------------------------------------------------------------------------------------------------------------------------------------------------------------------------------------------------------------------------------------------------------------------------------------------------------------------------------------------------------------------------|
| Journal:                        | <i>BMJ Open</i>                                                                                                                                                                                                                                                                                                                                                                                                                                                                                                                                                                           |
| Manuscript ID:                  | bmjopen-2014-004887                                                                                                                                                                                                                                                                                                                                                                                                                                                                                                                                                                       |
| Article Type:                   | Protocol                                                                                                                                                                                                                                                                                                                                                                                                                                                                                                                                                                                  |
| Date Submitted by the Author:   | 19-Jan-2014                                                                                                                                                                                                                                                                                                                                                                                                                                                                                                                                                                               |
| Complete List of Authors:       | Gould, Gillian; James Cook University, School of Public Health, Tropical Medicine and Rehabilitation Sciences; Southern Cross University, School of Health and Human Sciences<br>Watt, Kerriane; James Cook University, School of Public Health, Tropical Medicine and Rehabilitation Sciences<br>McEwen, Andy; University College London, Cancer Research UK Health Behaviour Unit<br>Cadet-James, Yvonne; James Cook University, School of Indigenous Australian Studies<br>Clough, Alan; James Cook University, School of Public Health, Tropical Medicine and Rehabilitation Sciences |
| <b>Primary Subject Heading</b>: | Smoking and tobacco                                                                                                                                                                                                                                                                                                                                                                                                                                                                                                                                                                       |
| Secondary Subject Heading:      | Public health, Addiction, Research methods                                                                                                                                                                                                                                                                                                                                                                                                                                                                                                                                                |
| Keywords:                       | Substance misuse < PSYCHIATRY, PREVENTIVE MEDICINE, PUBLIC HEALTH                                                                                                                                                                                                                                                                                                                                                                                                                                                                                                                         |
|                                 |                                                                                                                                                                                                                                                                                                                                                                                                                                                                                                                                                                                           |

SCHOLARONE™  
Manuscripts

1  
2  
3 **STUDY PROTOCOL - VALIDATION OF RISK ASSESSMENT SCALES IN A CROSS-**  
4 **SECTIONAL SURVEY OF ATTITUDES TO TOBACCO SMOKING AND**  
5 **INTENTIONS TO QUIT SMOKING IN AUSTRALIAN ABORIGINAL AND TORRES**  
6 **STRAIT ISLANDER PEOPLES.**  
7  
8  
9  
10  
11  
12  
13  
14

15 **Title Page**  
16  
17  
18  
19  
20

21 Dr. Gillian Sandra Gould corresponding author  
22  
23

24 PO Box 9077  
25  
26

27 Moonee Beach, New South Wales, 2450  
28  
29

30 Australia  
31  
32

33  
34 Email: [gillian.gould1@my.jcu.edu.au](mailto:gillian.gould1@my.jcu.edu.au)  
35  
36

37 Tel: +61 403615563  
38  
39

40 Fax: +612 66519365  
41  
42  
43

44 **Authors:**  
45  
46

47 **Gillian Sandra Gould**  
48  
49

50  
51 School of Public Health, Tropical Medicine and Rehabilitation Sciences  
52  
53

54 James Cook University  
55  
56

57 PO Box 6811  
58  
59  
60

1  
2  
3 Cairns, Queensland, 4870  
4

5  
6 Australia  
7

8  
9 Southern Cross University  
10

11  
12 Hogbin Drive  
13

14  
15 Coffs Harbour, NSW, 2450  
16  
17

18  
19 Australia  
20  
21

22  
23 **Kerriane Watt**  
24

25  
26 School of Public Health, Tropical Medicine and Rehabilitation Sciences  
27

28  
29 James Cook University  
30

31  
32 Townsville, Queensland, 4811  
33  
34

35  
36 Email: [kerriane.watt@jcu.edu.au](mailto:kerriane.watt@jcu.edu.au)  
37  
38

39  
40 **Andy McEwen**  
41

42  
43 Health Behaviour Research Centre  
44

45  
46 Epidemiology and Public Health  
47  
48

49  
50 University College London  
51

52  
53 London  
54

55  
56 United Kingdom  
57  
58  
59  
60

1  
2  
3 Email: [andy.mcewen@ucl.ac.uk](mailto:andy.mcewen@ucl.ac.uk)  
4  
5

6 **Yvonne Cadet-James**  
7

8  
9 School of Indigenous Australian Studies  
10

11  
12 James Cook University  
13

14  
15  
16 Townsville, Queensland  
17

18  
19 Australia  
20

21  
22  
23 Email: [yvonne.cadetjames@jcu.edu.au](mailto:yvonne.cadetjames@jcu.edu.au)  
24  
25

26 **Alan R Clough**  
27

28  
29 School of Public Health, Tropical Medicine and Rehabilitation Sciences  
30

31  
32 James Cook University  
33

34  
35  
36 PO Box 6811  
37

38  
39 Cairns, Queensland, 4870  
40

41  
42 Australia  
43  
44

45  
46 Email: [alan.clough@jcu.edu.au](mailto:alan.clough@jcu.edu.au)  
47  
48

49  
50  
51  
52  
53 Running Head: Risk assessment for smoking with Indigenous Australians  
54  
55  
56  
57  
58  
59  
60

1  
2  
3 *Key words: tobacco use, smoking, Australian Aborigines, risk behaviours, health*  
4  
5 *attitudes*  
6  
7  
8  
9  
10

11 Word Count: 3883  
12  
13  
14  
15  
16  
17  
18  
19  
20  
21  
22  
23  
24  
25  
26  
27  
28  
29  
30  
31  
32  
33  
34  
35  
36  
37  
38  
39  
40  
41  
42  
43  
44  
45  
46  
47  
48  
49  
50  
51  
52  
53  
54  
55  
56  
57  
58  
59  
60

For peer review only

**ABSTRACT:****Introduction**

Tobacco smoking is a very significant behavioural risk factor for the health of Australian Aboriginal and Torres Strait Islanders, and is embedded as a social norm. With a focus on women of child-bearing age, and men of similar age, this project aims to determine how Aboriginal and Torres Strait Islander smokers assess smoking risks and how these assessments contribute to their intentions to quit. The findings from this pragmatic study should contribute to developing culturally targeted interventions.

**Methods and analysis**

A cross-sectional study using quantitative and qualitative data. 120 Aboriginal and Torres Strait Islander community members aged 18-45 years will be recruited at community events and through an Aboriginal Community Controlled Health Service (ACCHS). Participants will be interviewed using a tablet computer or paper survey. The survey instrument uses modified risk behaviour scales, i.e. the Risk Behaviour Diagnosis (RBD) Scale and the Smoking Risk Assessment Target (SRAT) (adapted from the Risk Acceptance Ladder) to determine whether attitudes of Aboriginal and Torres Strait Islander smokers to health risk messages are predictors of intentions to quit smoking.

The questionnaire will be assessed for face and content validity with a panel of Indigenous community members. The internal consistency of the RBD subscales

1  
2  
3 and their patterns of correlation will be explored. Multivariate analyses will  
4  
5 examine predictors of intentions to quit. This will include demographics such as  
6  
7 age, gender, nicotine dependence, household smoking rules, and perceived  
8  
9 threat from smoking and efficacy for quitting. The two risk assessment scales  
10  
11 will be examined to see if participant responses are correlated.  
12  
13

### 14 15 **Ethics and dissemination** 16

17  
18 The Aboriginal Health & Medical Research Council and ethics committees at  
19  
20 James Cook and Southern Cross Universities approved the study. The results will  
21  
22 be published in a peer-reviewed journal and a community report will be  
23  
24 disseminated by the ACCHS, and at community forums.  
25  
26  
27  
28  
29  
30  
31  
32  
33  
34  
35  
36  
37  
38  
39  
40  
41  
42  
43  
44  
45  
46  
47  
48  
49  
50  
51  
52  
53  
54  
55  
56  
57  
58  
59  
60

Note about terminology:

We use the term Aboriginal and Torres Strait Islander peoples, except where previous research has reported findings from only one group e.g. Aboriginal people. Indigenous is used here to refer to Indigenous peoples in the international context, and issues, policies or systems, e.g. Indigenous health, Indigenous tobacco control.

## ARTICLE SUMMARY

### Article focus

- Limited knowledge of smoking behaviours and attitudes in Aboriginal and Torres Strait Islander peoples of childbearing age
- Study aims to validate risk assessment scales for Aboriginal and Torres Strait Islander smokers in NSW Australia
- Study has potential to inform anti-tobacco messages used in social marketing and counselling approaches in clinical consultations
- Privileges the voices of Aboriginal and Torres Strait Islander peoples

### Key Messages

- A better understanding of attitudes and experiences of smoking and quitting in this age group will add to current knowledge and could assist in better management of smoking



- Correlations of smokers' attitudes, perceptions of threat and efficacy with intentions to quit smoking will aid the development of tailored approaches

### **Strengths and Limitations of this Study**

- First study on risk assessment scales in the target population
- Unique approach to smoking in Aboriginal and Torres Strait Islander peoples of childbearing age
- Draws on both well-established and new measures
- Potential limitations relate to information and selection biases

### **INTRODUCTION**

Australia claims one of the lowest rates of tobacco smoking in OECD countries of 15.1%.[1] However several subgroups of the population maintain high rates of smoking.[2] Tobacco smoking is the main preventable risk factor contributing to the burden of disease in Aboriginal and Torres Strait Islander peoples.[3] Whilst there has been a significant drop in Indigenous smoking prevalence over the last 10 years overall, smoking rates are 2.6 times that of the general population at 41%, with higher rates of 50% or more in remote areas.[4, 5] However prevalence of Indigenous smoking in the age group 25-34 years has not decreased significantly for either gender,[4] and rates in pregnant Aboriginal

1  
2  
3 and Torres Strait Islander women are quadruple (49.3%) those of pregnant  
4  
5 women in the general population (12.1%).[6]  
6  
7

8  
9 Aboriginal and Torres Strait Islander peoples have a long history of tobacco  
10  
11 use.[7] It is believed that the effects of colonisation,[7] the stolen generation,[8]  
12  
13 and racism,[9] have all contributed to the contemporary use of tobacco, to the  
14  
15 detriment of the health and longevity of Aboriginal and Torres Strait Islander  
16  
17 peoples, and their future generations. Factors promoting smoking and smoking  
18  
19 initiation in Aboriginal and Torres Strait Islander peoples include community  
20  
21 and family norms of smoking,[10] smoking to promote social inclusiveness and  
22  
23 cohesion,[11] peer group belonging,[12] and daily stressors.[10]  
24  
25  
26  
27

28 There is limited knowledge about Indigenous attitudes to the risks of smoking.  
29  
30 There has been some exploration about what anti-smoking messages are  
31  
32 effective and acceptable for Aboriginal and Torres Strait Islander  
33  
34 populations,[13] as media messages or as adjuncts to clinical treatment.[14]  
35  
36 However, attitudes to prevailing health risk messages about smoking have been  
37  
38 particularly under-researched for Aboriginal and Torres Strait Islander maternal  
39  
40 smokers and those of childbearing age. A systematic review of knowledge,  
41  
42 attitudes and experiences of maternal smoking by Aboriginal and Torres Strait  
43  
44 Islander peoples revealed a lack of salience of media messages and potentially  
45  
46 some resistance to advice.[10] Equally pregnant women have highly protective  
47  
48 attitudes towards babies and children.[10] A recent study of attitudes of  
49  
50 maternal Aboriginal smokers and their family members suggested that attitudes  
51  
52 about the health risks of smoking may be influenced by messages not matching  
53  
54 the women's lived experiences, coupled with inadequate access to  
55  
56  
57  
58  
59  
60

1  
2  
3 information.[15] Limited knowledge about hazards of smoking and  
4  
5 cessation,[16] and the lack of salience of anti-smoking messages are barriers to  
6  
7 effective cessation.[10] If attitudes to risk taking behaviour for smoking and  
8  
9 responses to anti-tobacco messages are not understood it is difficult to formulate  
10  
11 effective messages and interventions. There are no best practice guidelines to  
12  
13 develop and personalise such messages for Aboriginal and Torres Strait Islander  
14  
15 peoples.[14, 17-18]  
16  
17

18  
19  
20 Our study therefore aims to determine how Aboriginal and Torres Strait Islander  
21  
22 smokers of childbearing age assess risks about tobacco smoking and how these  
23  
24 assessments are associated with their intentions to quit smoking or seeking help  
25  
26 to quit. We further aim to determine which demographic and behavioural factors  
27  
28 (such as age, gender, nicotine dependence level, household smoking rules) are  
29  
30 predictors of intentions to quit and seek help for quitting. Two risk assessment  
31  
32 scales for smoking will be examined for their cultural acceptability, validity and  
33  
34 reliability, and their utility as a pragmatic heuristic.  
35  
36  
37  
38  
39  
40  
41  
42

### 43 **Underpinning Theories**

44  
45  
46 Research shows that interventions based on the assessment of risk behaviour  
47  
48 can positively influence the risk taking behaviour that contributes to a range of  
49  
50 preventable diseases.[19]  
51  
52

53  
54 Witte et al proposed a theory called the Extended Parallel Process Model (EPPM)  
55  
56 to explain message processing and subsequent behavioural intentions.[20] (Key  
57  
58  
59  
60

1  
2  
3 constructs shown in Table 1.) According to the EPPM “when people perceive a  
4  
5 serious and relevant threat, they become scared”, [20] (p 318) and will take an  
6  
7 action to reduce their fear by one of two general pathways. People can either  
8  
9 control the danger elicited by the threat by making a positive and conscious shift  
10  
11 in attitude and behaviour (called protective motivation or danger control  
12  
13 responses). Alternately they may feel fearful and try and control the fear  
14  
15 unconsciously by denial, discounting or reactance against the threat (called  
16  
17 defensive motivation or fear control responses). If people feel no threat at all  
18  
19 (perhaps due to a lack of knowledge) there may be a low response to the  
20  
21 message. Furthermore Witte et al has shown that that the level of perceived  
22  
23 efficacy determines whether people engage in danger control or fear control  
24  
25 responses. [20]  
26  
27  
28  
29  
30

31 Witte devised and validated a scale called the Risk Behaviour Diagnosis (RBD)  
32  
33 scale to measure these responses across four dimensions of perceived threat  
34  
35 (perceived susceptibility and severity of threat) and perceived efficacy  
36  
37 (response efficacy and self-efficacy). [20] High threat responses coupled with  
38  
39 high efficacy tend to lead to danger control responses, in this case to adopt  
40  
41 message recommendations, change attitudes, intentions and smoking behaviour.  
42  
43 In contrast, if people feel they can not adopt the recommended response to avert  
44  
45 the treat, because of a lack of efficacy (it’s too hard, too little support, or it is  
46  
47 perceived as futile to do so), they typically try to control the fear by avoiding the  
48  
49 issue, discount the message, or may consider the issue is exaggerated.  
50  
51  
52  
53  
54

55 If fear control processes are initiated, it can be difficult to shift attitudes and  
56  
57 there is a need for carefully constructed messages to “break through defence  
58  
59  
60

1  
2  
3 mechanisms".[21] Therefore according to this theory people who are in fear  
4  
5 control will need assistance to build up efficacy rather than make them more  
6  
7 fearful. Bandura's work on self-efficacy confirms this and he considers self-  
8  
9 efficacy is central to any healthy behaviour change.[22]  
10

11  
12  
13 The EPPM model is a predominant message design theory,[23] and has been  
14  
15 widely applied to a range of health behaviours internationally and a wide range  
16  
17 of health promotional campaigns, and is the basis of tobacco counter-  
18  
19 marketing.[19] A study by Wong and Cappella has used the RBD to measure  
20  
21 responses to video-based anti-tobacco television advertisements.[24]  
22  
23 Assessment scales for risk behaviour, including the RBD, have been used in  
24  
25 several minority groups and across cultures.[25-33] However risk assessment  
26  
27 scales for tobacco and the EPPM have not been used or validated for Australian  
28  
29 Aboriginal or Torres Strait Islander or other Indigenous populations.  
30  
31  
32

33  
34  
35 Another theory informing this study is PRIME theory (P-plans; R-responses; I-  
36  
37 impulses; M-motives; E-evaluations), which proposes that smokers' motivations  
38  
39 are fluid, and can change unexpectedly.[34] The central tenets of PRIME theory  
40  
41 include people's wants and needs in the moment, and their self-identity.[34]  
42  
43 West suggests that a person can be stimulated to make a quit attempt, even if  
44  
45 they have not been thinking about quitting, especially if the intervention is  
46  
47 repeated and evidence-based therapy offered.[35] A new measure based on  
48  
49 PRIME theory, called the Risk Acceptance Ladder (RAL),[36] (Cattaruzza & West,  
50  
51 2014, in preparation) proposes that the blocks to effective behaviour change can  
52  
53 be ascertained by determining the individual level of risk acceptance and at what  
54  
55 stage motivation has stalled. For this study the RAL is modified into the Smoking  
56  
57  
58  
59  
60

1  
2  
3 Risk Assessment Target (SRAT) (see methods). If this measure correlates well  
4  
5 with message processing it may be also useful to assess Aboriginal and Torres  
6  
7 Strait Islander smokers.  
8  
9  
10  
11  
12  
13  
14  
15  
16  
17  
18  
19  
20  
21  
22  
23  
24  
25  
26  
27  
28  
29  
30

31 Table 1: Key constructs, definitions and measures (adapted from Witte et al.  
32 1996)  
33  
34  
35  
36

| 37 <b>Definitions of constructs</b>                                                                                                                                               | 38 <b>How measured on RBD scale or other</b> |
|-----------------------------------------------------------------------------------------------------------------------------------------------------------------------------------|----------------------------------------------|
| 39 <i>Perceived threat:</i> awareness of a specific<br>40 harm in the environment, consisting of:<br>41<br>42                                                                     | Total of perceived threat scores             |
| 43 <i>Susceptibility to threat:</i> belief about one's<br>44 risk of experiencing the threat<br>45<br>46                                                                          | Sub-total of susceptibility scores           |
| 47 <i>Severity of threat:</i> belief about the<br>48 magnitude of the threat<br>49<br>50                                                                                          | Sub-total of severity scores                 |
| 51 <i>Perceived efficacy:</i> thoughts about ease,<br>52 feasibility and the effectiveness of averting<br>53 the threat, consisting of:<br>54<br>55<br>56<br>57<br>58<br>59<br>60 | Total of perceived efficacy scores           |

|                                                                                        |                                                                                                                                                                                                                                                                                             |                                                                                                                  |
|----------------------------------------------------------------------------------------|---------------------------------------------------------------------------------------------------------------------------------------------------------------------------------------------------------------------------------------------------------------------------------------------|------------------------------------------------------------------------------------------------------------------|
| 1<br>2<br>3<br>4<br>5<br>6<br>7<br>8<br>9<br>10<br>11<br>12                            | <i>Self-efficacy</i> : belief in one's ability to perform recommended response                                                                                                                                                                                                              | Sub-total of self-efficacy scores                                                                                |
| 13<br>14<br>15<br>16<br>17<br>18<br>19<br>20<br>21<br>22<br>23<br>24<br>25<br>26<br>27 | <i>Response efficacy</i> : belief about effectiveness of recommended response to avert the threat                                                                                                                                                                                           | Sub-total of response efficacy scores                                                                            |
| 28<br>29<br>30<br>31<br>32<br>33<br>34<br>35                                           | <i>Danger control dominance</i> : the dominant response in the person faced with a threat, who considers themselves able to perform the recommended response, believes the response to be effective, therefore tries to reduce the danger by taking positive action (protective motivation) | High efficacy score and high threat score                                                                        |
| 36<br>37<br>38<br>39<br>40<br>41<br>42<br>43<br>44<br>45<br>46<br>47<br>48<br>49<br>50 | <i>Danger control responses (protective motivation)</i> : beliefs, attitudes, intentions, and behaviour changes in accordance with the message recommendations                                                                                                                              | Score from intentions to quit/seek help scales (Wong and Cappella) and responses to MTSS questions               |
| 51<br>52<br>53<br>54<br>55<br>56<br>57<br>58<br>59<br>60                               | <i>Fear control dominance</i> : the dominant emotional response in the person when faced with a threat, who feels unable to perform the recommended response, and/or believes the response to be ineffectual, and tries to psychologically reduce their fear by defensive motivation        | Low efficacy score with high threat score                                                                        |
|                                                                                        | <i>Fear control responses (defensive motivation)</i> : coping responses that diminish fear                                                                                                                                                                                                  | Score from questions about defensive avoidance, denial, reactance, message derogation and perceived manipulation |

|                                                                                                                                                                 |                                                                                                                                                                                                                                                |
|-----------------------------------------------------------------------------------------------------------------------------------------------------------------|------------------------------------------------------------------------------------------------------------------------------------------------------------------------------------------------------------------------------------------------|
| <p><i>Critical point:</i> when perceptions of threat begin to outweigh perceptions of efficacy, causing shift from danger control to fear control processes</p> | <p>The exact critical point can vary with topics and populations</p>                                                                                                                                                                           |
| <p><i>Discriminating value:</i> a numerical value used to discriminate between people in danger vs. fear control</p>                                            | <p>Formula: <math>(\Sigma \text{perceived efficacy}) - (\Sigma \text{perceived threat}) = \text{discriminating value}</math></p> <p>A positive score indicates danger control processes; a negative score indicates fear control processes</p> |
| <p><i>Protective responses:</i> similar to danger control responses, but beliefs/attitudes are centred around protecting others from tobacco smoke</p>          | <p>Score from 5 new measures to attitudes about smoking exposure for Aboriginal or Torres Strait Islanders, babies and children</p>                                                                                                            |

Legend: RBD – risk behaviour diagnosis; MTSS – motivation to stop smoking;  $\Sigma$  – sum of;

## METHODS AND ANALYSIS

### Study Overview

This is a cross-sectional study to investigate the validity and reliability of risk assessment scales, and predictors of intentions to quit smoking, for Australian Aboriginal and Torres Strait Islander smokers of both genders, aged 18-45 years



1  
2  
3 old. The study will be conducted through face-to-face interviews in a regional  
4  
5 centre in NSW Australia.  
6  
7

## 8 9 Research Questions

- 10  
11 1. Are RBD/SRAT and associated measures of tobacco behaviour reliable  
12 and valid in Australian Aboriginal and Torres Strait Islander smokers?  
13
- 14  
15 2. What are the main predictors of intentions to quit smoking and intentions  
16 to seek help for quitting in Aboriginal and Torres Strait Islander smokers?  
17
- 18  
19 3. What variables confound the associated factors and intentions to quit and  
20 seek help in Aboriginal and Torres Strait Islander smokers?  
21
- 22  
23 4. What smoking related attitudes (e.g., danger/fear control responses) are  
24 associated with positive/negative discriminating values on the RBD?  
25
- 26  
27 5. What are the associations between the RBD and SRAT?  
28  
29  
30  
31  
32  
33  
34  
35  
36

## 37 38 Study Population

### 39 40 Participant recruitment and setting

41  
42  
43 The study site is a regional centre in NSW. Recruitment into the study will be by  
44 personal intercept, primarily at regional community and social events, and in  
45 other settings likely to yield interest, including a local Aboriginal Community  
46 Controlled Health Service (ACCHS). The survey will be administered by face-to-  
47 face interview, using where possible a tablet computer, connected by cellular  
48 network to a secure on-line survey site. Where connectivity is unreliable a paper  
49 survey will be used and data submitted on-line later. The interviewers will be  
50  
51  
52  
53  
54  
55  
56  
57  
58  
59  
60

1  
2  
3 either the first author (non-Indigenous female) or Indigenous research  
4  
5 assistants, or ACCHS staff.  
6  
7

8  
9  
10 Inclusion criteria are Aboriginal and/or Torres Strait Islander people, aged 18-  
11  
12 45 years old who currently smoke. Participants will be offered a \$10 shopping  
13  
14 voucher for their time.  
15

### 16 17 18 Sample size calculation

19  
20  
21 The estimated sample size is 120 participants. Sample size estimations are based  
22  
23 on the procedure described by Altman.[37] Standardised differences for  
24  
25 intention to quit smoking and intention to seek help to quit smoking are  
26  
27 calculated using means and standard deviations published by Wong and  
28  
29 Capella.[24] A total sample size of 110 is required to detect a significant  
30  
31 difference between people in 'danger control' versus people in 'fear control'  
32  
33 (according to the RDB scale) and intentions to quit smoking, at  $\alpha < .05$ , and  
34  
35 90% power. However for the multivariate analysis 120 participants is required  
36  
37 to adequately estimate the effect of 6 key variables (20 per variable).  
38  
39  
40  
41  
42  
43  
44  
45

### 46 47 48 Sampling Stratification

49  
50 Random sampling will not be feasible. To ensure that the convenience sample is  
51  
52 as representative of the target group as possible, the sample will be stratified by  
53  
54 age group and gender. Data from the 2011 Australian Census determines the  
55  
56 population parameters for persons identified as Aboriginal and/or Torres Strait  
57  
58  
59  
60

1  
2  
3 Islander, by age group and gender in the regional city. The proportion of smokers  
4  
5 within each age group and gender are estimated using smoking prevalence data  
6  
7 from the 2008 National Aboriginal and Torres Strait Islander Social Survey  
8  
9 (Table 2).[38]  
10  
11  
12  
13  
14  
15  
16  
17  
18  
19  
20  
21  
22  
23  
24  
25  
26  
27  
28  
29

30 Table 2: Stratified sampling strategy of target Aboriginal and Torres Strait  
31  
32 Islander populations  
33  
34  
35  
36

|       | Target        |          | Smoking    |          | % of target       |               | Sample        |          |  |
|-------|---------------|----------|------------|----------|-------------------|---------------|---------------|----------|--|
|       | populations   |          | Prevalence |          | populations in    |               | stratified by |          |  |
|       | numbers (2011 |          | (2008      |          | regional city who |               | gender & age  |          |  |
|       | Census from   |          | NATSISS)   |          | smoke             |               | group         |          |  |
|       | regional city |          |            |          |                   |               |               |          |  |
|       | LGA)          |          |            |          |                   |               |               |          |  |
| Age   |               |          |            |          | Male              | Female        |               |          |  |
| range | Male          | Female   | Male       | Female   | <i>N(% of</i>     | <i>N(% of</i> | Male          | Female   |  |
| (yrs) | <i>N</i>      | <i>N</i> | <i>%</i>   | <i>%</i> | <i>total)</i>     | <i>total)</i> | <i>N</i>      | <i>N</i> |  |

|       |     |     |      |      |         |         |           |           |
|-------|-----|-----|------|------|---------|---------|-----------|-----------|
|       |     |     |      |      | 67      | 71      |           |           |
| 18-24 | 172 | 178 | 38.7 | 39.7 | (13.9%) | (14.7%) | 17        | 18        |
|       |     |     |      |      | 80      | 92      |           |           |
| 25-34 | 142 | 184 | 56   | 50.1 | (16.6%) | (19%)   | 20        | 23        |
|       |     |     |      |      | 85      | 88      |           |           |
| 35-44 | 154 | 187 | 55.5 | 47.3 | (17.6%) | (18.2%) | 21        | 22        |
|       |     |     |      |      | 232     | 251     |           |           |
| Total | 468 | 549 |      |      | (48.1%) | (51.9%) | <b>58</b> | <b>63</b> |

As can be seen from Table 2, the final sample will be 58 males and 63 female smokers (N= 121). This represents 25% of the Aboriginal and Torres Strait Islander smokers aged 18-45yrs in the regional city (121/483).

## MEASURES/DATA COLLECTION

### The survey

The survey will collect quantitative data on participants' smoking behaviours, initiation of smoking, attitudes to smoking and cessation, attitudes to health risks of smoking, experiences with quit attempts and smoking cessation, and future intentions to quit smoking or seek help for quitting. Views will be elicited about smoking in pregnancy and the protection of babies and children from tobacco smoke. The questions will explore the support available from family and peers

1  
2  
3 for quitting and professional support. The survey will use open-ended questions  
4  
5 to explore general attitudes to smoking, and the interviewer will record  
6  
7 narratives expressed in the course of the interview in 'notes sections'.  
8  
9

10  
11 The questionnaire includes several instruments:  
12  
13

#### 14 15 Tobacco Dependence Scales 16

17  
18 Heaviness of Smoking Index (HSI) is an accepted method of assessing nicotine  
19  
20 dependence levels, calculated from the time to first cigarette and number of  
21  
22 cigarettes smoked per day. Its reliability has been shown to be better than the  
23  
24 longer Fagerstrom Test for Nicotine Dependence (FTND).[39]  
25  
26  
27  
28

29  
30 Strength of Urges to Smoke (SUTS) is another measure of dependence found to  
31  
32 be more reliable for predicting cessation than the HSI.[39] It is a routine part of  
33  
34 the "Smoking in England" survey, administered to over 10,000 smokers per  
35  
36 annum.[40] It is a newer scale for nicotine dependence and is included here, as it  
37  
38 has not yet been used with Australian Aboriginal and Torres Strait Islander  
39  
40 smokers or other Indigenous populations.  
41  
42  
43  
44

#### 45 46 Intentions to quit 47 48

49  
50 The Motivation To Stop Scale (MTSS) uses dichotomous measures (yes/no) for  
51  
52 intentions to quit (want to quit, 'should quit', intends to quit) and has shown  
53  
54  
55  
56  
57  
58  
59  
60

1  
2  
3 good level of prediction for quitting.[41] Intentions to quit and intentions to seek  
4 help (Likert scale) are also adapted from Wong & Cappella.[24]  
5  
6  
7  
8

#### 9 Risk assessment scales

10  
11  
12  
13  
14 The Risk Behaviour Diagnosis Scale consists of a series of questions (Likert  
15 scales) on four aspects: severity of threat, susceptibility to threat, response  
16 efficacy and self-efficacy.[20]  
17  
18  
19

20  
21  
22  
23 As a measure of fear control responses participants will be asked to respond to  
24 four questions about reactance, avoidance and message derogation on a Likert  
25 scale.[20] Similarly for danger control responses an aggregate score of the five  
26 questions on intentions to change smoking behaviour/seek help will be  
27 calculated.[24] Because of the evidence pointing to strong protective attitudes in  
28 the target population, five questions on a Likert scale will be asked to determine  
29 protective responses about smoking in pregnancy, around children, and for  
30 Aboriginal and Torres Strait Islander peoples in general. A protection score will  
31 be calculated from these responses.  
32  
33  
34  
35  
36  
37  
38  
39  
40  
41  
42  
43  
44  
45

46 The Risk Acceptance Ladder is a new measure currently being used in Italy to  
47 research a population with high rates of smoking (Cattaruzza & West, 2014, in  
48 preparation). The measure has been adapted to the Aboriginal and Torres Strait  
49 Islander population, as below.  
50  
51  
52  
53  
54  
55  
56  
57  
58  
59  
60

### Consultative process, face validity and questionnaire adaption

In the formative phase of the research, before ethics approvals were finalised, several community consultation processes were conducted. The aim was to test the content and face validity, suitability, readability, cultural appropriateness, acceptability and feasibility of the survey instrument. Consultation was through a focus group with Aboriginal and/or Torres Strait Islander people in the target age group, and an Aboriginal elder, recruited from a local Aboriginal Studies class and Aboriginal staff. Several consultative interviews were also held with a senior Aboriginal Health Worker (AHW) specialising in tobacco. Expert input was obtained for the scales from their respective inventors (Witte, and Cattaruzza and West).

The community consultation group and AHW requested changes to several questions and suggested additional questions about smoking initiation. Some of the RBD core statements were reworded to make them easier to understand. Additionally several sensitive questions about socioeconomic status and pregnancy were reworded.

The RAL was adapted for the Aboriginal and Torres Strait Islander populations, and was renamed the SRAT as follows:

(a) It was deemed more culturally appropriate to depict the measure as a target with concentric circles (progressing from the outside to the centre) instead of a ladder, for the Aboriginal and Torres Strait Islander population.

1  
2  
3 (b) The potential responses of the SRAT were reworded to become more  
4 appropriate for the target population, and two additional responses included.  
5  
6

7  
8 Changes were approved by the HRECs.  
9

## 10 11 12 13 14 15 **ANALYSIS** 16

17  
18 Table 3 outlines variables that will be measured.  
19

20  
21  
22 Table 3: Variables from questionnaire  
23  
24  
25  
26  
27  
28  
29  
30  
31  
32  
33  
34  
35  
36  
37  
38  
39  
40  
41  
42  
43  
44  
45  
46  
47  
48  
49  
50  
51  
52  
53  
54  
55  
56  
57  
58  
59  
60



### Demographics

- Age
- Gender (Male/Female)
- Aboriginal and Torres Strait Islander status (Aboriginal/Torres Strait Islander/both)
- SES (calculated from postcode, suburb, income source, health care card use, education) – for details contact authors
- Environmental variables
  - a. Number of smokers in household (1/2-3/>3)
  - b. Pregnant women in the house (Y/N)
  - c. Children in the house (Y/N)
  - d. Complete, partial or no bans for household smoking
  - e. Smoke free behaviours of participants (house and car)

### Smoking behaviour variables

- Nicotine dependence scores (Heaviness of Smoking Index and SUTS)
- Age of smoking initiation and uptake
- Factors influencing smoking initiation (11 response options)
- Patterns of smoking (frequency and type)
- Smoking by others in social circle (Y/N)
- Current/previous quit attempts (Y/N)
- Current/previous use of cessation therapies (Y/N)
- Level of support for quitting (social and professional) (sliding scales 0-10)

### Smoking risk related attitudes

- RBD scale resulting a composite score (discriminating value, recoded positive or negative)
- Threat score (three items for susceptibility plus three for severity of threat on Likert scales of 1-5)
- Efficacy score (three items for response efficacy plus three for self-efficacy on Likert scales of 1-5)
- RBD results recoded into four quadrants of high efficacy/high threat; high efficacy/low threat; low efficacy/high threat; low efficacy/low threat;
- Fear control responses score (calculated from questions on avoidance, denial, and refuting messages, Likert scales 1-5)
- Danger control responses score (calculated from questions on intentions to quit or seek help, Likert scales 1-5)
- Protective responses score (calculated from questions on attitudes about protecting babies/children, Likert scales 1-5)
- General attitudes about smoking and quitting (13 response options)
- SRAT (choice of 1 option from 12, will be reduced to 4 categories)

### Behavioural intentions

- Intentions to quit (MTSS) (want/do not want) - if affirmative then how soon intends to quit (3month/1 month/hope to soon/don't know)
- Intentions to quit or reduce smoking (Wong & Capella) (Likert scales 1-4)
- Intentions to seek help with quitting (Wong & Capella) (Likert scales 1-4)

Legend: Y – yes; N – no; SUTS – strength of urges to smoke; RBD – risk behaviour

1  
2  
3 diagnosis; SRAT – smoking risk assessment target; MTSS – motivation to stop  
4  
5 smoking scale  
6  
7

### 8 9 **Statistical analyses**

10  
11  
12 On study completion, the data entered through the survey software will be used  
13  
14 to generate a summary report and exported directly to SPSS v 20 for analysis.  
15

16  
17 Descriptive analyses will summarise the data for all variables.  
18

19  
20 To measure the reliability and validity of the scales the following will be used.  
21

- 22  
23 1. Content validity and face validity is qualitatively assessed through the  
24  
25 community panel and expert consultation for RBD and SRAT  
26  
27
- 28  
29 2. The patterns of correlation will be explored between the RBD subscale  
30  
31 scores (susceptibility and severity of threat, and response and self-  
32  
33 efficacy) and also for danger control responses, fear control responses  
34  
35 and protective responses  
36
- 37  
38 3. Internal consistency of sub-scales will be assessed with Cronbach's  $\alpha$ .  
39

40  
41 Multivariate analyses will seek the most likely demographic predictors of  
42  
43 intentions to quit smoking/seek help for quitting, e.g. age, gender, dependence  
44  
45 levels, household smoking rules. Psychological factors such as threat and efficacy  
46  
47 scores, danger and fear control responses will be analysed to assess whether  
48  
49 they further influence the outcome measures.  
50

51  
52  
53 RBD scores and the SRAT will be examined to see if participant responses are  
54  
55 correlated.  
56  
57  
58  
59  
60

1  
2  
3 Qualitative and open-ended responses will undergo thematic analyses, and will  
4  
5 be used to enrich the quantitative findings.  
6  
7  
8  
9

## 10 11 12 **ETHICS AND DISSEMINATION** 13

14  
15 The study is low risk. The research will adhere to Australia's National Health and  
16  
17 Medical Research Council's Values and Ethics in Aboriginal and Torres Strait  
18  
19 Islander Health Research 2003 guidelines, i.e. reciprocity, respect, equality,  
20  
21 responsibility, survival and protection, spirit and integrity.[42] The primary  
22  
23 HREC is the Aboriginal Health & Medical Research Council (AH&MRC), which  
24  
25 approved the study with support from the partnering ACCHS (approval number  
26  
27 928). Additional HRECs ratified the primary approval (James Cook University  
28  
29 (H4467) and Southern Cross University (ECN-13-242).  
30  
31  
32

33  
34  
35  
36 Participants will be approached at community events that are targeted to the  
37  
38 local Australian Aboriginal and Torres Strait Islander communities. Potential  
39  
40 recruits will be asked if they fulfil the selection criteria and canvassed about  
41  
42 their willingness to join in the study. All participants will be provided with a  
43  
44 participant information sheet advising of the purpose of the study and  
45  
46 implications regarding:  
47  
48

- 49 • Objectives of the research
- 50
- 51 • Why the information is being collected and how it will be used, accessed  
52  
53 and stored  
54  
55

- Voluntary nature of the study, provision for withdrawal of consent, assurance of confidentiality and anonymity

After the information sheet is explained, the participant will be asked to provide informed consent by having their name typed on the touch screen of the tablet computer and ticking the 'agree' box. All data will be de-identified and data and materials will be stored for seven years, in a secure location, and where digitally stored will be password-protected and only accessed by the researchers.

This study is one of several studies contributing to a PhD Public Health thesis for the first author. Journal articles and presentations at relevant national and international conferences to academics, researchers and stakeholders will disseminate these findings. The outcomes of the study will also inform policy and practice recommendations. A community report will be sent to the partnering ACCHS for dissemination to clients at the service and to the communities who have been involved. Community-based forums will be held as appropriate.

## **DISCUSSION**

This study aims to determine how Australian Aboriginal and Torres Strait Islander smokers of childbearing age assess risks about tobacco smoking and how these assessments are associated with their intentions to quit smoking. We aim to validate two risk assessment scales for Aboriginal and Torres Strait

1  
2  
3 Islander smokers, which could have the potential for research transference to a  
4  
5 clinical or public health setting.  
6  
7

8  
9 The RBD scale was originally designed as a clinical tool to be used in the context  
10  
11 of delivering tailored health messages at a clinic for sexually transmitted  
12  
13 diseases and HIV testing.[20] Advice was then adapted to individuals according  
14  
15 to their responses.  
16  
17

18  
19 Primary health care practitioners and clinicians are often faced with the task of  
20  
21 assisting Aboriginal and Torres Strait Islander smokers to quit smoking. Anti-  
22  
23 tobacco messages do not just lie in the domain of social marketing: they also  
24  
25 need to be carefully pitched to maximise receptivity and support behaviour  
26  
27 change within the clinical consultation. Little is known about the effectiveness of  
28  
29 smoking behaviour change models for Aboriginal and Torres Strait Islander  
30  
31 peoples. The trans-theoretical model (stages of change or SOC) has been widely  
32  
33 used in Australia for Aboriginal and Torres Strait Islander smokers, but  
34  
35 outcomes have never been evaluated.[43] Aboriginal smokers in remote areas  
36  
37 have been described as more likely to be in the pre-contemplative or  
38  
39 contemplative stages of change and require more assistance to be ready to quit  
40  
41 smoking.[44] Also it is known that interventions based on the SOC are not  
42  
43 effective in pregnancy.[45]  
44  
45  
46  
47  
48

49  
50 If the measures under examination here are found to be reliable for the target  
51  
52 audience of Aboriginal and Torres Strait Islander smokers of childbearing age,  
53  
54 then accurate assessments could be made. A new model based on assessment of  
55  
56 risk behaviour could have the potential to assess fear versus danger control  
57  
58  
59  
60

1  
2  
3 responses and facilitate the pitching of tailored anti-tobacco messages for the  
4  
5 individual, build motivational tension for quitting, and yet avoid engendering  
6  
7 fear control responses or resistance.  
8  
9

10  
11 If people are engaged in fear control processes, messages developed should focus  
12  
13 on the efficacy of the recommended response to counteract the high levels of  
14  
15 perceived threat. Focusing on threat messages alone may cause the messages to  
16  
17 backfire. It is important to emphasise that the recommended responses are  
18  
19 feasible and effective to avert the threat from smoking. It is essential to help  
20  
21 people develop a belief in their ability to quit smoking, develop supportive  
22  
23 environments for quitting, and provide easy access to treatment.  
24  
25  
26  
27

28 Central to building self-efficacy are strategies recommended by Bandura.[22] He  
29  
30 suggests several approaches: building skills, self-control and mastery for  
31  
32 quitting; learning about the experiences of others who have successfully quit;  
33  
34 verbal persuasion and motivation; helping people adopt a positive mindset; and  
35  
36 importantly having access to effective therapies.[22]  
37  
38  
39

40 Alternatively, if the target audience is in danger control, messages can remind  
41  
42 people about the threat of smoking to maintain motivation, whilst also  
43  
44 increasing efficacy for quitting, as above.  
45  
46  
47

48 People with low threat perceptions may be neither in danger or fear control.  
49  
50 They may need to be convinced about the seriousness of or their susceptibility to  
51  
52 the threat. This group requires messages aimed at improving knowledge and  
53  
54 correcting any misconceptions. This may be best achieved by having messages  
55  
56  
57  
58  
59  
60

1  
2  
3 come from someone who is very similar to the client (possibly through use of  
4  
5 tailored videos or personalised narratives).  
6  
7

8  
9 The SRAT may prove a simplified way to approach risk assessment in this target  
10  
11 group, as it demands a single response to a question. The measures require  
12  
13 validation for Aboriginal and Torres Strait Islander smokers in this child-rearing  
14  
15 age bracket, prior to a more formal assessment of feasibility and effectiveness in  
16  
17 a clinical setting.  
18  
19

## 20 21 22 23 24 **Limitations and Strengths** 25 26

27  
28 The study will be based on a sample from one regional area of NSW, fostering  
29  
30 ownership of the project results for the local partnering ACCHS. Australian  
31  
32 Aboriginal groups are diverse and this study will be conducted in just one region.  
33  
34 It is unknown how many Torres Strait Islanders reside in the area and how  
35  
36 many will chose to participate in the study, These limitations impact on  
37  
38 generalizability and transferability of the findings, although this is a pragmatic  
39  
40 constraint for all research in diverse Indigenous groups. Selection bias may be  
41  
42 operant if only those more willing to talk about their smoking agreeing to  
43  
44 participate, another inevitable challenge for this kind of research. Recruiting  
45  
46 some participants through a health service may favour those already with health  
47  
48 problems, and who may already have motivation to quit smoking. There could be  
49  
50 information biases: smoking status will be based on self-report and not any  
51  
52 objective measures; recall bias may be operant with asking people to recollect  
53  
54 their smoking history and perceived level of support for quitting; and social  
55  
56  
57  
58  
59  
60

1  
2  
3 desirability bias with people reporting what they think the researcher wants to  
4  
5 hear.  
6  
7

8  
9 On the other hand, this is the first study as far as we know to validate risk  
10  
11 assessment measures for tobacco smoking in a population of Aboriginal and  
12  
13 Torres Strait Islander smokers. Health education and behaviour studies are  
14  
15 tested for validity and reliability inconsistently,[46] and very few scales are  
16  
17 validated for the Aboriginal and Torres Strait Islander population.[47] So the  
18  
19 study is needed and an important one, although small and specific to one region.  
20  
21 The study takes a unique approach to smoking in Aboriginal and Torres Strait  
22  
23 Islander peoples of childbearing age by drawing on both well-established and  
24  
25 new measures from the health communication and addiction fields. If these  
26  
27 measures prove to be valid and reliable they have a high potential for research  
28  
29 translation into clinical settings. The outcomes could further inform the  
30  
31 development and refining of social marketing policies and strategies for anti-  
32  
33 tobacco messages through all media.  
34  
35  
36  
37  
38  
39  
40  
41

#### 42 **AUTHOR CONTRIBUTIONS**

43  
44  
45  
46 GSG is responsible for the concept and design of the project, developing and  
47  
48 adapting the survey instruments and digital format, testing the suitability of the  
49  
50 survey for Indigenous participants, conducting surveys, training and supervising  
51  
52 Indigenous research assistants to conduct surveys, collating and analysing and  
53  
54 interpreting results, writing reports and manuscripts.  
55  
56  
57  
58  
59  
60



1  
2  
3 KW contributed to the research design and statistical analysis and critical review  
4  
5 of manuscripts. AM advises on any aspect relating to tobacco smoking, smoking  
6  
7 risk behaviours and the survey, and critical review of manuscripts. YCJ as  
8  
9 Aboriginal academic advisor advises on the Indigenous community consultation  
10  
11 processes, recruitment and the cultural interpretation of results. ARC oversees  
12  
13 the study and advises on all aspects, and provides critical review of manuscripts.  
14  
15  
16  
17  
18  
19  
20

## 21 **FUNDING**

22  
23  
24 This study was funded by the following grants awarded to GSG as principal  
25  
26 researcher:  
27  
28  
29

- 30 • National Health and Medical Research Council (Australia) and National Heart  
31  
32 Foundation (Australia) post-graduate scholarship for Indigenous health  
33  
34 research - APP1039759 and PP 11S 6181  
35  
36
- 37 • Royal Australian College of General Practitioners and Australian Primary  
38  
39 Health Care Research Institute Indigenous Health Award 2013  
40  
41
- 42 • James Cook University, Faculty of Medicine, Health & Molecular Sciences,  
43  
44 Graduate Research Scheme grant 2013  
45  
46  
47  
48  
49  
50

## 51 **ACKNOWLEDGEMENTS**

52  
53  
54  
55  
56  
57  
58  
59  
60

1  
2  
3 We acknowledge the valuable input of the Aboriginal community panel and the  
4  
5 support of the partnering ACCHS for this survey, without them the study would  
6  
7 not be possible.  
8  
9

## 10 11 12 13 14 **REFERENCES**

- 15  
16  
17 1. OECD. OECD Factbook 2013: Economic, Environmental and Social  
18  
19 Statistics: Smoking: OECD Publishing; 2013.  
20  
21
- 22  
23 2. Baker A, Ivers RG, Bowman J, et al. Where there's smoke, there's fire: high  
24  
25 prevalence of smoking among some sub-populations and recommendations for  
26  
27 intervention. *Drug Alcohol Rev* 2006;25(1):85-96.  
28
- 29  
30 3. Vos T, Barker B, Stanley L, et al. The burden of disease and injury in  
31  
32 Aboriginal and Torres Strait Islander peoples 2003. Brisbane: The University of  
33  
34 Queensland; 2007.  
35
- 36  
37 4. Australian Bureau of Statistics. 4727.0.55.001 - Australian Aboriginal and  
38  
39 Torres Strait Islander Health Survey: First Results, Australia, 2012-13 Canberra:  
40  
41 Australian Bureau of Statistics; 27/11/2013 [cited 2013 28 November];  
42  
43 Available from:  
44  
45 [http://www.abs.gov.au/ausstats/abs@.nsf/Lookup/39E15DC7E770A144CA257](http://www.abs.gov.au/ausstats/abs@.nsf/Lookup/39E15DC7E770A144CA257C2F00145A66?opendocument)  
46  
47 [C2F00145A66?opendocument](http://www.abs.gov.au/ausstats/abs@.nsf/Lookup/39E15DC7E770A144CA257C2F00145A66?opendocument).  
48
- 49  
50 5. Robertson J, Conigrave K, Ivers R, et al. Addressing high rates of smoking  
51  
52 in remote Aboriginal communities: New evidence for GPs. *Aust Fam Physician*  
53  
54 2013;42(7):492-6.  
55  
56  
57  
58  
59  
60

- 1  
2  
3 6. Li Z, Zeki R, Hilder L, et al. Australia's mothers and babies 2010. In:  
4  
5 National Perinatal Epidemiology and Statistics Unit, editor. Sydney: Australian  
6  
7 Institute of Health and Welfare; 2011. Canberra: Australian Institute of Health  
8  
9 and Welfare (AIHW) National Perinatal Epidemiology and Statistics Unit; 2012.
- 10  
11 7. Brady M. Historical and cultural roots of tobacco use among Aboriginal  
12  
13 and Torres Strait Island people. *Aust NZ J Public Health* 2002;26(2):120-4.
- 14  
15 8. Thomas DP, Briggs V, Anderson I, et al. The social determinants of being  
16  
17 an Indigenous non-smoker. *Aust NZ J Public Health* 2008;32(2):110-6.
- 18  
19 9. Paradies Y, Harris R, & Anderson I. The Impact of Racism on Indigenous  
20  
21 Health in Australia and Aotearoa: Towards a Research Agenda, Discussion Paper  
22  
23 No. 4. Darwin: Cooperative Research Centre for Aboriginal Health 2008.
- 24  
25 10. Gould GS, Munn J, Watters T, et al. Knowledge and views about maternal  
26  
27 tobacco smoking and barriers for cessation in Aboriginal and Torres Strait  
28  
29 Islanders: A systematic review and meta-ethnography. *Nicotine Tob Res*  
30  
31 2013;15(5):863-74.
- 32  
33 11. Johnston V, Thomas DP. Smoking behaviours in a remote Australian  
34  
35 Indigenous community: The influence of family and other factors. *Soc Sci Med*  
36  
37 2008;67(11):1708-16.
- 38  
39 12. Passey M, Gale JT, Sanson-Fisher RW. "It's almost expected": rural  
40  
41 Australian Aboriginal women's reflections on smoking initiation and  
42  
43 maintenance: a qualitative study. *BMC Womens Health* 2011;11(55).
- 44  
45 13. Stewart HS, Bowden JA, Bayly MC, et al. Potential effectiveness of specific  
46  
47 anti-smoking mass media advertisements among Australian Indigenous  
48  
49 smokers. *Health Educ Res* 2011;26(6):961-75.
- 50  
51  
52  
53  
54  
55  
56  
57  
58  
59  
60

- 1  
2  
3 14. Gould GS. A Snapshot of the Development of Anti-Tobacco Messages for  
4  
5 Aboriginal and Torres Strait Islander Communities – Report from an Australian  
6  
7 National Survey. Cairns: James Cook University; 2013.  
8  
9  
10 15. Gould GS, Munn J, Avuri S, et al. “Nobody smokes in the house if there's a  
11  
12 new baby in it”: Aboriginal perspectives on tobacco smoking in pregnancy and in  
13  
14 the household in regional NSW Australia. *Women Birth* 2013;26(4):246-53.  
15  
16 <http://dx.doi.org/10.1016/j.wombi.2013.08.006>.  
17  
18  
19 16. Passey M, D'Este CA, Stirling JM, et al. Factors associated with antenatal  
20  
21 smoking among Aboriginal and Torres Strait Islander women in two  
22  
23 jurisdictions. *Drug Alcohol Rev* 2012;31(5):608-16.  
24  
25  
26 17. Ivers R. Anti-tobacco programs for Aboriginal and Torres Strait Islander  
27  
28 people In: Closing the Gap Clearinghouse AIoHaW, editor. Canberra: Australian  
29  
30 Government; 2011.  
31  
32  
33 18. Australian Department of Health and Ageing. Developmental Research to  
34  
35 inform the National Action to Reduce Smoking Rates Social Marketing Campaign.  
36  
37 2010 [updated 2010, Dec 7 2011, November 20]; Available from:  
38  
39 <http://www.health.gov.au/internet/ctg/publishing.nsf/Content/development->  
40  
41 [market-research.](http://www.health.gov.au/internet/ctg/publishing.nsf/Content/development-)  
42  
43  
44 19. Witte K, Allen M. A Meta-Analysis of Fear Appeals: Implications for  
45  
46 Effective Public Health Campaigns. *Health Educ Behav* 2000;27(5):591-615.  
47  
48  
49 20. Witte K, Cameron KA, McKeon JK, et al. Predicting Risk Behaviors:  
50  
51 Development and Validation of a Diagnostic Scale. *J Health Commun* 1996;1:317-  
52  
53 41.  
54  
55  
56 21. Witte K, Meyer G, Martell D. Effective health risk messages: a step-by-step  
57  
58 guide. Thousand Oaks, CA: Sage Publications; 2001.  
59  
60

- 1  
2  
3 22. Bandura A. Health Promotion by Social Cognitive Means. *Health Educ*  
4 *Behav* 2004;31:143-64.  
5  
6  
7 23. Maloney EK, Lapinski MK, Witte K. Fear Appeals and Persuasion: A  
8 Review and Update of the Extended Parallel Process Model. *Soc Personal Psychol*  
9 *Compass* 2011;5(4):206-19.  
10  
11 24. Wong NCH, Cappella JN. Antismoking Threat and Efficacy Appeals: Effects  
12 on Smoking Cessation Intentions for Smokers with Low and High Readiness to  
13 Quit. *J Appl Commun Res* 2009;37(1):1-20.  
14  
15 25. Guidry JJ, Fagan P, Walker V. Cultural sensitivity and readability of breast  
16 and prostate printed cancer education materials targeting African Americans. *J*  
17 *Natl Med Assoc* 1998;90(3):165-9.  
18  
19 26. Lee HS, Park JS. Cultural orientation and the persuasive effects of fear  
20 appeals: The case of anti-smoking public service announcements. *J of Med*  
21 *Marketing* 2012;12(2):73-80.  
22  
23 27. Murray-Johnson L, Witte K, Boulay M, et al. Using health education  
24 theories to explain behavior change: A cross-country analysis. *Int Q Community*  
25 *Health Educ* 2006;25(1-2):185-207.  
26  
27 28. Muthusamy N, Levine TR, Weber R. Scaring the Already Scared: Some  
28 Problems With HIV/AIDS Fear Appeals in Namibia. *Journal of Communication*  
29 2009;59(2):317-44.  
30  
31 29. Smith RA, Ferrara M, Witte K. Social Sides of Health Risks: Stigma and  
32 Collective Efficacy. *Health Commun* 2007 2007/04/10;21(1):55-64.  
33  
34 30. Sobre-Denton M, Hart D. Mind the gap: Application-based analysis of  
35 cultural adjustment models. *Int J Intercult Relat* 2008;32(6):538-52.  
36  
37  
38  
39  
40  
41  
42  
43  
44  
45  
46  
47  
48  
49  
50  
51  
52  
53  
54  
55  
56  
57  
58  
59  
60

- 1  
2  
3 31. Terblanche-Smit M, Terblanche NS. Race and attitude formation in  
4  
5 HIV/Aids fear advertising. *J Bus Res* 2010;63(2):121-5.  
6  
7  
8 32. Witte K, Berkowitz JM, Lillie JM, et al. Radon Awareness and Reduction  
9  
10 Campaigns for African Americans: A Theoretically Based Evaluation. *Health Educ*  
11  
12 *Behav* 1998;25(3):284-303.  
13  
14 33. Witte K. A Theoretically Based Evaluation of HIV / AIDS Prevention  
15  
16 Campaigns Along the Trans-Africa Highway in Kenya. *J Health Commun*  
17  
18 1998;3(4):345-63.  
19  
20  
21 34. West R. Theory of Addiction. Oxford: Blackwell; 2006.  
22  
23 35. West R. The multiple facets of cigarette addiction and what they mean for  
24  
25 encouraging and helping smokers to stop. *COPD* 2009;6(4):277-83.  
26  
27  
28 36. Cattaruzza MS, West R. Why do doctors and medical students smoke  
29  
30 when they must know how harmful it is? *Eur J Public Health* 2013; 23 (2): 188-  
31  
32 189.  
33  
34 37. Altman D. Practical statistics for medical research. London: Chapman and  
35  
36 Hall; 1991.  
37  
38  
39 38. ABS. National Aboriginal and Torres Strait Islander Social Survey 2008.  
40  
41 Canberra: Australian Bureau of Statistics; 2009.  
42  
43 <http://www.abs.gov.au/ausstats/abs@.nsf/mf/4714.0/>  
44  
45  
46 39. Fidler J, Shahab L, West R. Strength of urges to smoke as a measure of  
47  
48 severity of cigarette dependence: comparison with the Fagerstrom Test for  
49  
50 Nicotine Dependence and its components. *Addiction* 2011;106(3):631-8.  
51  
52  
53 40. Fidler JA, Shahab L, West O, et al. 'The smoking toolkit study': a national  
54  
55 study of smoking and smoking cessation in England. *BMC Public Health*  
56  
57 2011;11(479):479.  
58  
59  
60

- 1  
2  
3 41. Kotz D, Brown J, West R. Predictive validity of the Motivation To Stop  
4  
5 Scale (MTSS): a single-item measure of motivation to stop smoking. *Drug Alcohol*  
6  
7 *Depend* 2013 Feb 1;128(1-2):15-9.  
8  
9  
10 42. NHMRC. Values and Ethics: Guidelines for Ethical Conduct in Aboriginal  
11  
12 and Torres Strait Islander Health Research. Canberra, ACT: Commonwealth of  
13  
14 Australia; 2003.  
15  
16 43. Centre for Health Advancement - Population Health Division. The NSW  
17  
18 SmokeCheck Aboriginal Tobacco Prevention Project 2007 - 2008 final report:  
19  
20 NSW Department of Health 2010.  
21  
22  
23 44. Campbell S BI, Swinbourne A, Cadet-James Y, et al. Stages of Change,  
24  
25 Smoking Behaviour and Readiness to Quit in a Large Sample of Indigenous  
26  
27 Australians Living in Eight Remote North Queensland Communities. *Int J Environ*  
28  
29 *Res Public Health* 2013;10(4):1562-71.  
30  
31  
32 45. Lumley J, Chamberlain C, Dowswell, T, et al. Interventions for promoting  
33  
34 smoking cessation during pregnancy. *Cochrane Database Syst Rev* 2009(Issue 4  
35  
36 Art. No.: CD001055. doi:10.1002/14651858.CD001055.pub2.).  
37  
38  
39 46. Barry AE, Chaney B, Piazza-Gardner AK, et al. Validity and Reliability  
40  
41 Reporting Practices in the Field of Health Education and Behavior: A Review of  
42  
43 Seven Journals. *Health Educ Behav* 2013 Apr 3.  
44  
45  
46 47. Stephens A, Bohanna I, Graham D, et al. Screening and assessment  
47  
48 instruments for use in Indigenous-specific alcohol and drug treatment  
49  
50 rehabilitation. *Journal of Tropical Psychology* 2013;3.  
51  
52  
53  
54  
55  
56  
57  
58  
59  
60

# BMJ Open

## VALIDATION OF RISK ASSESSMENT SCALES AND PREDICTORS OF INTENTIONS TO QUIT SMOKING IN AUSTRALIAN ABORIGINAL AND TORRES STRAIT ISLANDER PEOPLES: A CROSS-SECTIONAL SURVEY PROTOCOL

|                                 |                                                                                                                                                                                                                                                                                                                                                                                                                                                                                                                                                                         |
|---------------------------------|-------------------------------------------------------------------------------------------------------------------------------------------------------------------------------------------------------------------------------------------------------------------------------------------------------------------------------------------------------------------------------------------------------------------------------------------------------------------------------------------------------------------------------------------------------------------------|
| Journal:                        | <i>BMJ Open</i>                                                                                                                                                                                                                                                                                                                                                                                                                                                                                                                                                         |
| Manuscript ID:                  | bmjopen-2014-004887.R1                                                                                                                                                                                                                                                                                                                                                                                                                                                                                                                                                  |
| Article Type:                   | Protocol                                                                                                                                                                                                                                                                                                                                                                                                                                                                                                                                                                |
| Date Submitted by the Author:   | 14-May-2014                                                                                                                                                                                                                                                                                                                                                                                                                                                                                                                                                             |
| Complete List of Authors:       | Gould, Gillian; James Cook University, School of Public Health, Tropical Medicine and Rehabilitation Sciences; Southern Cross University, School of Health and Human Sciences<br>Watt, Kerriane; James Cook University, School of Public Health, Tropical Medicine and Rehabilitation Sciences<br>McEwen, Andy; University College London, Cancer Research UK Health Behaviour Unit<br>Cadet-James, Yvonne; James Cook University, School of Indigenous Australian Studies<br>Clough, Alan; James Cook University, Australian Institute of Tropical Health and Medicine |
| <b>Primary Subject Heading</b>: | Smoking and tobacco                                                                                                                                                                                                                                                                                                                                                                                                                                                                                                                                                     |
| Secondary Subject Heading:      | Public health, Addiction, Research methods                                                                                                                                                                                                                                                                                                                                                                                                                                                                                                                              |
| Keywords:                       | Substance misuse < PSYCHIATRY, PREVENTIVE MEDICINE, PUBLIC HEALTH                                                                                                                                                                                                                                                                                                                                                                                                                                                                                                       |
|                                 |                                                                                                                                                                                                                                                                                                                                                                                                                                                                                                                                                                         |

SCHOLARONE™  
Manuscripts



1  
2  
3 **VALIDATION OF RISK ASSESSMENT SCALES AND PREDICTORS OF**  
4 **INTENTIONS TO QUIT SMOKING IN AUSTRALIAN ABORIGINAL AND TORRES**  
5 **STRAIT ISLANDER PEOPLES: A CROSS-SECTIONAL SURVEY PROTOCOL**  
6  
7  
8  
9

10  
11  
12  
13 **Title Page**  
14

15  
16  
17  
18 Dr. Gillian Sandra Gould corresponding author  
19

20  
21  
22 PO Box 9077  
23

24  
25 Moonee Beach, New South Wales, 2450  
26

27  
28 Australia  
29

30  
31  
32 Email: [gillian.gould1@my.jcu.edu.au](mailto:gillian.gould1@my.jcu.edu.au)  
33

34  
35 Tel: +61 403615563  
36

37  
38 Fax: +612 66519365  
39

40  
41  
42 Authors:  
43

44  
45 **Gillian Sandra Gould**  
46

47  
48 School of Public Health, Tropical Medicine and Rehabilitation Sciences  
49

50  
51 James Cook University  
52

53  
54  
55 PO Box 6811  
56  
57  
58  
59  
60

1  
2  
3 Cairns, Queensland, 4870  
4  
5

6 Australia  
7  
8

9  
10 Southern Cross University  
11

12 Hogbin Drive  
13

14  
15  
16 Coffs Harbour, New South Wales, 2450  
17  
18

19 Australia  
20  
21

22  
23 **Kerriane Watt**  
24

25  
26 School of Public Health, Tropical Medicine and Rehabilitation Sciences  
27  
28

29 James Cook University  
30  
31

32  
33 Townsville, Queensland, 4811  
34  
35

36 Email: [kerriane.watt@jcu.edu.au](mailto:kerriane.watt@jcu.edu.au)  
37  
38

39  
40 **Andy McEwen**  
41

42  
43 Health Behaviour Research Centre  
44  
45

46 Epidemiology and Public Health  
47  
48

49 University College London  
50  
51

52  
53 London  
54  
55

56 United Kingdom  
57  
58  
59  
60

1  
2  
3 Email: [andy.mcewen@ucl.ac.uk](mailto:andy.mcewen@ucl.ac.uk)  
4  
5

6 **Yvonne Cadet-James**  
7

8  
9 School of Indigenous Australian Studies  
10

11  
12 James Cook University  
13

14  
15  
16 Townsville, Queensland  
17

18  
19 Australia  
20

21  
22  
23 Email: [yvonne.cadetjames@jcu.edu.au](mailto:yvonne.cadetjames@jcu.edu.au)  
24  
25

26 **Alan R Clough**  
27

28  
29 Australian Institute of Tropical Health and Medicine  
30

31  
32 James Cook University  
33

34  
35  
36 PO Box 6811  
37

38  
39 Cairns, Queensland, 4870  
40

41  
42 Australia  
43  
44

45  
46 Email: [alan.clough@jcu.edu.au](mailto:alan.clough@jcu.edu.au)  
47  
48

49  
50 Running Head: Risk assessment for smoking with Indigenous Australians  
51  
52  
53  
54  
55  
56  
57  
58  
59  
60

1  
2  
3 *Key words: tobacco use, smoking, Australian Aborigines, Indigenous population, risk*  
4  
5 *behaviours*  
6  
7

8  
9 Word Count: 4787  
10  
11  
12  
13  
14  
15  
16  
17  
18  
19  
20  
21  
22  
23  
24  
25  
26  
27  
28  
29  
30  
31  
32  
33  
34  
35  
36  
37  
38  
39  
40  
41  
42  
43  
44  
45  
46  
47  
48  
49  
50  
51  
52  
53  
54  
55  
56  
57  
58  
59  
60

For peer review only

**ABSTRACT:****Introduction**

Tobacco smoking is a very significant behavioural risk factor for the health of Australian Aboriginal and Torres Strait Islanders, and is embedded as a social norm. With a focus on women of child-bearing age, and men of similar age, this project aims to determine how Aboriginal and Torres Strait Islander smokers assess smoking risks and how these assessments contribute to their intentions to quit. The findings from this pragmatic study should contribute to developing culturally targeted interventions.

**Methods and analysis**

A cross-sectional study using quantitative and qualitative data. 120 Aboriginal and Torres Strait Islander community members aged 18-45 years will be recruited at community events and through an Aboriginal Community Controlled Health Service (ACCHS). Participants will be interviewed using a tablet computer or paper survey. The survey instrument uses modified risk behaviour scales, i.e. the Risk Behaviour Diagnosis (RBD) Scale and the Smoking Risk Assessment Target (SRAT) (adapted from the Risk Acceptance Ladder) to determine whether attitudes of Aboriginal and Torres Strait Islander smokers to health risk messages are predictors of intentions to quit smoking.

The questionnaire will be assessed for face and content validity with a panel of Indigenous community members. The internal consistency of the RBD subscales and their patterns of correlation will be explored. Multivariate analyses will

1  
2  
3 examine predictors of intentions to quit. This will include demographics such as  
4  
5 age, gender, nicotine dependence, household smoking rules, and perceived  
6  
7 threat from smoking and efficacy for quitting. The two risk assessment scales  
8  
9 will be examined to see if participant responses are correlated.  
10

### 11 12 13 **Ethics and dissemination**

14  
15  
16 The Aboriginal Health & Medical Research Council Ethics Committee and  
17  
18 university ethics committees approved the study. The results will be published  
19  
20 in a peer-reviewed journal and a community report will be disseminated by the  
21  
22 ACCHS, and at community forums.  
23  
24  
25  
26  
27  
28  
29  
30  
31  
32  
33  
34  
35  
36  
37  
38  
39  
40  
41  
42  
43  
44  
45  
46  
47  
48  
49  
50  
51  
52  
53  
54  
55  
56  
57  
58  
59  
60

Note about terminology:

We use the term Aboriginal and Torres Strait Islander peoples, except where previous research has reported findings from only one group e.g. Aboriginal people. Indigenous is used here to refer to Indigenous peoples in the international context, and issues, policies or systems, e.g. Indigenous health, Indigenous tobacco control.

## ARTICLE SUMMARY

### Article focus

- Limited knowledge of how Aboriginal and Torres Strait Islander peoples of childbearing age assess the risks about smoking, and their levels of efficacy for cessation
- Study aims to validate risk assessment scales for Aboriginal and Torres Strait Islander smokers in New South Wales (NSW) Australia
- Study has potential to inform anti-tobacco messages used in social marketing and counselling approaches in clinical consultations
- Privileges the voices of Aboriginal and Torres Strait Islander peoples

### Key Messages

- A better understanding of attitudes and experiences of smoking and quitting in this age group will add to current knowledge and could assist in better management of smoking

- 1  
2  
3 • Correlations of smokers' attitudes, perceptions of threat and efficacy with  
4 intentions to quit smoking will aid the development of tailored  
5 approaches  
6  
7  
8  
9

### 10 **Strengths and Limitations of this Study**

- 11  
12  
13  
14 • First study on risk assessment scales in the target population  
15  
16 • Unique approach to smoking in Aboriginal and Torres Strait Islander  
17 peoples of childbearing age  
18  
19  
20  
21 • Draws on both well-established and new measures  
22  
23  
24 • Potential limitations relate to information and selection biases.  
25  
26  
27  
28  
29  
30  
31  
32  
33  
34  
35  
36  
37  
38  
39  
40  
41  
42  
43  
44  
45  
46  
47  
48  
49  
50  
51  
52  
53  
54  
55  
56  
57  
58  
59  
60



## INTRODUCTION

Australia claims one of the lowest rates of tobacco smoking in OECD countries of 15.1%.[1] However several subgroups of the population maintain high rates of smoking.[2] Tobacco smoking is the main preventable risk factor contributing to the burden of disease in Aboriginal and Torres Strait Islander peoples.[3] Whilst there has been a significant drop in Indigenous smoking prevalence over the last 10 years overall, smoking rates are 2.6 times that of the general population at 41%, with higher rates of 50% or more in remote areas.[4-5] However prevalence of Indigenous smoking in the age group 25-34 years has not decreased significantly for either gender,[4] and rates in pregnant Aboriginal and Torres Strait Islander women are quadruple (49.3%) those of pregnant women in the general population (12.1%).[6]

While it is acknowledged that Indigenous populations across and even within different continents belong to very diverse communities with their own cultures and norms, some broad factors impact on Indigenous peoples in colonised Western nations. American Indians, Alaskan Natives, New Zealand Māori and Inuit all have a higher prevalence of smoking than the mainstream populations,[7] particularly in their reproductive years, resulting in significant health disparities.[8] Smoking is comparably affected by the social determinants of health, and cultural factors, including for some First Nation peoples ceremonial and spiritual uses of tobacco.[9] Aboriginal and Torres Strait Islander peoples have a long history of tobacco use.[10] It is believed that the effects of colonisation,[10] the stolen generation,[11] and racism,[12] have all contributed to the contemporary use of tobacco, to the detriment of the health and longevity

1  
2  
3 of Aboriginal and Torres Strait Islander peoples, and their future generations.  
4  
5 Factors promoting smoking and smoking initiation in Aboriginal and Torres  
6  
7 Strait Islander peoples include community and family norms of smoking,[13]  
8  
9 smoking to promote social inclusiveness and cohesion,[14] peer group  
10  
11 belonging,[15] and daily stressors.[13]  
12  
13

14  
15 Several studies have explored the knowledge levels of Aboriginal and Torres  
16  
17 Strait Islander peoples about tobacco smoking,[16-18] with more limited  
18  
19 exploration about Indigenous attitudes and beliefs about the risks of smoking.  
20  
21

22 There has been some exploration about what anti-smoking messages are  
23  
24 effective and acceptable for Aboriginal and Torres Strait Islander  
25  
26 populations,[19] as media messages or as adjuncts to clinical treatment.[20]  
27  
28

29 Mainstream antismoking campaigns have shown to be effective in terms of recall  
30  
31 and perceived effectiveness by Indigenous peoples in Australia,[21-22] the U.S.  
32  
33

34 [23] and NZ,[24] but have not necessarily translated into increased quit rates in  
35  
36 these populations.[25] Aboriginal and Torres Strait Islander smokers in a forced  
37  
38 exposure to several television advertisement rated those containing strong  
39  
40 graphic imagery or personal narratives as effective for a range of measures  
41  
42 including being more likely to quit.[19] Indigenous peoples in the US, Australia  
43  
44 and New Zealand (NZ), have a preference for culturally targeted campaigns.[25]  
45  
46

47 Aboriginal and Torres Strait Islander viewers aged 16-40 years of the 'Break The  
48  
49 Chain' campaign in Australia positively rated the targeted advertisement, had  
50  
51 good recall and 57% stated they intended to quit in the following month.[26]  
52  
53

54 Where culturally targeted campaigns have been tested, alongside generic  
55  
56  
57  
58  
59  
60

1  
2  
3 campaigns, for example in NZ youth, they proved as effective at supporting Maori  
4  
5 to quit smoking as generic messages were for the general NZ population.[27]  
6  
7

8  
9 However, attitudes of Indigenous maternal smokers, to prevailing health risk  
10  
11 messages about smoking, have been under-researched. A systematic review used  
12  
13 meta-ethnography to synthesise the evidence on the knowledge, attitudes and  
14  
15 experiences of maternal smoking by Aboriginal and Torres Strait Islander  
16  
17 peoples,[13] from seven studies.[14, 28-33] The synthesis revealed a lack of  
18  
19 salience of media messages and potentially some resistance to advice.[13]  
20  
21

22  
23 Equally pregnant women have highly protective attitudes towards babies and  
24  
25 children.[13] A recent study of attitudes of maternal Aboriginal smokers and  
26  
27 their family members suggested that attitudes about the health risks of smoking  
28  
29 may be influenced by messages not matching the women's lived experiences,  
30  
31 coupled with inadequate access to information.[34] Limited knowledge about  
32  
33 the specific hazards of smoking and cessation,[35] and the lack of salience of  
34  
35 anti-smoking messages are barriers to effective cessation.[13] However, a  
36  
37 program using a culturally targeted smoking cessation video with pregnant  
38  
39 Alaska Native smokers was no more efficacious than in the control group.[36]  
40  
41

42  
43 Issues less well understood are how Indigenous adults broadly assess their risks  
44  
45 in relation to tobacco smoking (not just their knowledge of adverse health  
46  
47 effects) and how these assessments are related to their intentions to quit  
48  
49 smoking. If attitudes to risk taking behaviour for smoking and responses to anti-  
50  
51 tobacco messages are not understood it is difficult to formulate effective  
52  
53 messages and interventions. There are no best practice guidelines to develop and  
54  
55  
56  
57  
58  
59  
60

1  
2  
3 personalise such messages for Aboriginal and Torres Strait Islander peoples.[18,  
4  
5 37-38]  
6  
7

8  
9 Our study therefore aims to determine how Aboriginal and Torres Strait Islander  
10  
11 smokers of childbearing age assess risks about tobacco smoking and how these  
12  
13 assessments are associated with their intentions to quit smoking or seeking help  
14  
15 to quit. We further aim to determine which demographic and behavioural factors  
16  
17 (such as age, gender, nicotine dependence level, household smoking rules) are  
18  
19 predictors of intentions to quit and seek help for quitting. Two risk assessment  
20  
21 scales for smoking will be examined for their cultural acceptability, validity and  
22  
23 reliability, and their utility as a pragmatic heuristic.  
24  
25  
26  
27  
28  
29  
30

### 31 **Underpinning Theories**

32  
33

34  
35 Research shows that interventions based on the assessment of risk behaviour  
36  
37 can positively influence the risk taking behaviour that contributes to a range of  
38  
39 preventable diseases.[39]  
40  
41

42  
43 Witte et al proposed a theory called the Extended Parallel Process Model (EPPM)  
44  
45 to explain message processing and subsequent behavioural intentions.[20] (Key  
46  
47 constructs shown in Table 1.)  
48  
49  
50  
51  
52  
53  
54  
55  
56  
57  
58  
59  
60

Table 1: Key constructs, definitions and measures (adapted from Witte et al.[40])

| Definitions of constructs                                                                                                                                                                                                                                                                                                    | How measured on RBD scale or other                                                                                              |
|------------------------------------------------------------------------------------------------------------------------------------------------------------------------------------------------------------------------------------------------------------------------------------------------------------------------------|---------------------------------------------------------------------------------------------------------------------------------|
| <p><i>Perceived threat</i>: awareness of a specific harm in the environment, consisting of:</p> <p><i>Susceptibility to threat</i>: belief about one's risk of experiencing the threat</p> <p><i>Severity of threat</i>: belief about the magnitude of the threat</p>                                                        | <p>Total of perceived threat scores</p> <p>Sub-total of susceptibility scores</p> <p>Sub-total of severity scores</p>           |
| <p><i>Perceived efficacy</i>: thoughts about ease, feasibility and the effectiveness of averting the threat, consisting of:</p> <p><i>Self-efficacy</i>: belief in one's ability to perform recommended response</p> <p><i>Response efficacy</i>: belief about effectiveness of recommended response to avert the threat</p> | <p>Total of perceived efficacy scores</p> <p>Sub-total of self-efficacy scores</p> <p>Sub-total of response efficacy scores</p> |
| <p><i>Danger control dominance</i>: the dominant response in the person faced with a threat, who considers themselves able to perform the recommended response, believes the response to be effective, therefore tries to reduce the danger by taking positive action (protective motivation)</p>                            | <p>High efficacy score and high threat score</p>                                                                                |
| <p><i>Danger control responses (protective motivation)</i>: beliefs, attitudes, intentions, and behaviour changes in accordance with</p>                                                                                                                                                                                     | <p>Score from intentions to quit/seek help scales (Wong and Cappella) and responses to MTSS questions</p>                       |

|                                                                                                                                                                                                                                                                                      |                                                                                                                                                                                                                          |
|--------------------------------------------------------------------------------------------------------------------------------------------------------------------------------------------------------------------------------------------------------------------------------------|--------------------------------------------------------------------------------------------------------------------------------------------------------------------------------------------------------------------------|
| the message recommendations                                                                                                                                                                                                                                                          |                                                                                                                                                                                                                          |
| <i>Fear control dominance</i> : the dominant emotional response in the person when faced with a threat, who feels unable to perform the recommended response, and/or believes the response to be ineffectual, and tries to psychologically reduce their fear by defensive motivation | Low efficacy score with high threat score                                                                                                                                                                                |
| <i>Fear control responses (defensive motivation)</i> : coping responses that diminish fear                                                                                                                                                                                           | Score from questions about defensive avoidance, denial, reactance, message derogation and perceived manipulation                                                                                                         |
| <i>Critical point</i> : when perceptions of threat begin to outweigh perceptions of efficacy, causing shift from danger control to fear control processes                                                                                                                            | The exact critical point can vary with topics and populations                                                                                                                                                            |
| <i>Discriminating value</i> : a numerical value used to discriminate between people in danger vs. fear control                                                                                                                                                                       | Formula: $(\Sigma \text{perceived efficacy}) - (\Sigma \text{perceived threat}) = \text{discriminating value}$<br>A positive score indicates danger control processes; a negative score indicates fear control processes |
| <i>Protective responses</i> : similar to danger control responses, but beliefs/attitudes are centred around protecting others from tobacco smoke                                                                                                                                     | Score from 5 new measures to attitudes about smoking exposure for Aboriginal or Torres Strait Islanders, babies and children                                                                                             |

1  
2  
3 Legend: RBD – risk behaviour diagnosis; MTSS – motivation to stop smoking;  $\Sigma$  –  
4  
5 sum of.  
6  
7  
8  
9

10  
11  
12 According to the EPPM, “when people perceive a serious and relevant threat,  
13  
14 they become scared”, [40] (p 318) and will take an action to reduce their fear by  
15  
16 one of two general pathways. People can either control the danger elicited by  
17  
18 the threat by making a positive and conscious shift in attitude and behaviour  
19  
20 (called protective motivation or danger control responses). Alternately they may  
21  
22 feel fearful and try and control the fear unconsciously by denial, discounting or  
23  
24 reactance against the threat (called defensive motivation or fear control  
25  
26 responses). If people feel no threat at all (perhaps due to a lack of knowledge)  
27  
28 there may be a low response to the message. Furthermore Witte et al has shown  
29  
30 that that the level of perceived efficacy determines whether people engage in  
31  
32 danger control or fear control responses. [40]  
33  
34  
35  
36  
37

38 Witte devised and validated a scale called the Risk Behaviour Diagnosis (RBD)  
39  
40 scale to measure these responses across four dimensions of perceived threat  
41  
42 (perceived susceptibility and severity of threat) and perceived efficacy (response  
43  
44 efficacy and self-efficacy). [40] High threat responses coupled with high efficacy  
45  
46 tend to lead to danger control responses, in this case to adopt message  
47  
48 recommendations, change attitudes, intentions and smoking behaviour. In  
49  
50 contrast, if people feel they cannot adopt the recommended response to avert  
51  
52 the treat, because of a lack of efficacy (it’s too hard, too little support, or it is  
53  
54  
55  
56  
57  
58  
59  
60

1  
2  
3 perceived as futile to do so), they typically try to control the fear by avoiding the  
4  
5 issue, discount the message, or may consider the issue is exaggerated.  
6  
7

8  
9 If fear control processes are initiated, it can be difficult to shift attitudes and  
10  
11 there is a need for carefully constructed messages to “break through defence  
12  
13 mechanisms”.<sup>[41]</sup> Therefore according to this theory people who are in fear  
14  
15 control will need assistance to build up efficacy rather than make them more  
16  
17 fearful. Bandura’s work on self-efficacy confirms this and he considers self-  
18  
19 efficacy is central to any healthy behaviour change.<sup>[42]</sup>  
20  
21

22  
23 The EPPM model is a predominant message design theory,<sup>[43]</sup> and has been  
24  
25 widely applied to a range of health behaviours internationally and a wide range  
26  
27 of health promotional campaigns, and is the basis of tobacco counter-  
28  
29 marketing.<sup>[37]</sup> A study by Wong and Cappella has used the RBD to measure  
30  
31 responses to video-based anti-tobacco television advertisements.<sup>[44]</sup>  
32  
33 Assessment scales for risk behaviour, including the RBD, have been used in  
34  
35 several minority groups and across cultures.<sup>[45-53]</sup> However risk assessment  
36  
37 scales for tobacco and the EPPM have not been used or validated for Australian  
38  
39 Aboriginal or Torres Strait Islander or other Indigenous populations.  
40  
41  
42

43  
44 Another theory informing this study is PRIME theory (P-plans; R-responses; I-  
45  
46 impulses; M-motives; E-evaluations), which proposes that smokers’ motivations  
47  
48 are fluid, and can change unexpectedly.<sup>[54]</sup> The central tenets of PRIME theory  
49  
50 include people’s wants and needs in the moment, and their self-identity.<sup>[54]</sup>  
51  
52 West suggests that a person can be stimulated to make a quit attempt, even if  
53  
54 they have not been thinking about quitting, especially if the intervention is  
55  
56  
57  
58  
59  
60



1  
2  
3 repeated and evidence-based therapy offered.[55] A new measure based on  
4  
5 PRIME theory, called the Risk Acceptance Ladder (RAL),[56] (Cattaruzza & West,  
6  
7 2014, in preparation) proposes that the blocks to effective behaviour change can  
8  
9 be ascertained by determining the individual level of risk acceptance and at what  
10  
11 stage motivation has stalled. For this study the RAL is modified into the Smoking  
12  
13 Risk Assessment Target (SRAT) (see methods). If this measure correlates well  
14  
15 with message processing it may be also useful to assess Aboriginal and Torres  
16  
17 Strait Islander smokers.  
18  
19

## 20 21 22 23 24 25 26 **Rationale for assessing validity and reliability of the scales for Aboriginal** 27 28 **and Torres Strait Islander smokers**

29  
30  
31 Assessment scales, developed for Western populations, are important to validate  
32  
33 before use in a cross-cultural context.[57] Theoretical concepts developed in the  
34  
35 context of the dominant Western psychology and communication fields may not  
36  
37 transfer into a cross-cultural or Indigenous setting.[57-58] Preliminary phases of  
38  
39 community engagement are an important part of the process of validation, and  
40  
41 will be described below.[58] Results from the validation and reliability process  
42  
43 also need careful interpretation with culturally competent advisors.[58]  
44  
45  
46  
47  
48  
49  
50  
51

## 52 **METHODS AND ANALYSIS**

### 53 54 55 **Study Overview** 56 57 58 59 60

1  
2  
3 This is a cross-sectional study to investigate the validity and reliability of risk  
4 assessment scales, and predictors of intentions to quit smoking, for Australian  
5 Aboriginal and Torres Strait Islander smokers of both genders, aged 18-45 years  
6  
7 old. The study will be conducted through face-to-face interviews in a regional  
8  
9 centre in NSW Australia.  
10  
11  
12

### 13 14 15 Research Questions

- 16  
17  
18 1. Are RBD/SRAT and associated measures of tobacco behaviour reliable  
19 and valid in Australian Aboriginal and Torres Strait Islander smokers?  
20  
21
- 22  
23 2. What are the main predictors of intentions to quit smoking and intentions  
24 to seek help for quitting in Aboriginal and Torres Strait Islander smokers?  
25  
26
- 27  
28 3. What variables confound the associated factors and intentions to quit and  
29 to seek help in Aboriginal and Torres Strait Islander smokers?  
30  
31
- 32  
33 4. What smoking related attitudes (e.g., danger/fear control responses) are  
34 associated with positive/negative discriminating values on the RBD?  
35  
36
- 37  
38 5. What are the associations between the RBD and SRAT?  
39  
40  
41  
42  
43

### 44 45 Study Population

#### 46 47 Participant recruitment and setting

48  
49  
50 The study site is a regional centre in NSW. Recruitment into the study will be by  
51 personal intercept, primarily at regional community and social events, and in  
52 other settings likely to yield interest, including a local Aboriginal Community  
53  
54 Controlled Health Service (ACCHS). The survey will be administered by face-to-  
55  
56  
57  
58  
59  
60

1  
2  
3 face interview, using where possible a tablet computer, connected by cellular  
4 network to a secure on-line survey site. Where connectivity is unreliable a paper  
5 survey will be used and data submitted on-line later. The interviewers will be  
6 either the first author (non-Indigenous female) or Indigenous research  
7 assistants, or ACCHS staff.  
8  
9  
10  
11  
12

13  
14  
15  
16 Aboriginal and/or Torres Strait Islander people, aged 18-45 years old who  
17 currently smoke will be included in the study, if they self-report as Indigenous  
18 and are in the age bracket. Although we would have preferred to include  
19 participants under 18yrs, the ethics committee did not support this. Participants  
20 will be offered a \$10 shopping voucher for their time.  
21  
22  
23  
24  
25  
26  
27  
28  
29  
30  
31  
32

### 33 Sample size calculation

34  
35  
36 The estimated sample size is 120 participants. Sample size estimations are based  
37 on the procedure described by Altman.[59] Standardised differences for  
38 intention to quit smoking and intention to seek help to quit smoking are  
39 calculated using means (M) and standard deviations (SD) published by Wong  
40 and Capella (intent to quit M 2.48, SD 0.78; intent to seek help M 1.85, SD  
41 0.77).[44] These figures are taken from a different population because there  
42 have been no relevant studies in Indigenous peoples. A total sample size of 110  
43 is required to detect a significant difference between people in 'danger control'  
44 versus people in 'fear control' (according to the RDB scale) and intentions to quit  
45 smoking, at  $\alpha < .05$ , and 90% power. An additional sample size calculation  
46  
47  
48  
49  
50  
51  
52  
53  
54  
55  
56  
57  
58  
59  
60

1  
2  
3 was performed to determine the required sample size to detect prevalence of  
4  
5 knowledge, attitudes and behavior within the target population. The required  
6  
7 sample size is 100, based on 50% prevalence, 10% precision and 95%  
8  
9 confidence intervals. However for the multivariate analysis 120 participants are  
10  
11 required (assuming 6 key variables).[60]  
12  
13

### 14 15 16 17 18 19 Sampling Stratification

20  
21  
22 Random sampling will not be feasible. To ensure that the convenience sample is  
23  
24 as representative of the target group as possible, the sample will be stratified by  
25  
26 age group and gender. Data from the 2011 Australian Census determines the  
27  
28 population parameters for persons identified as Aboriginal and/or Torres Strait  
29  
30 Islander, by age group and gender in the regional city. The proportion of smokers  
31  
32 within each age group and gender are estimated using smoking prevalence data  
33  
34 from the 2008 National Aboriginal and Torres Strait Islander Social Survey  
35  
36 (Table 2).[61]  
37  
38  
39  
40  
41  
42  
43  
44  
45  
46  
47  
48  
49  
50  
51  
52  
53  
54  
55  
56  
57  
58  
59  
60

Table 2: Stratified sampling strategy of target Aboriginal and Torres Strait

Islander populations

| Target        |          | Smoking    |          | % of target       |               | Sample        |           |           |
|---------------|----------|------------|----------|-------------------|---------------|---------------|-----------|-----------|
| populations   |          | Prevalence |          | populations in    |               | stratified by |           |           |
| numbers (2011 |          | (2008      |          | regional city who |               | gender & age  |           |           |
| Census from   |          | NATSISS)   |          | smoke             |               | group         |           |           |
| regional city |          |            |          |                   |               |               |           |           |
| LGA)          |          |            |          |                   |               |               |           |           |
| Age           |          |            |          | Male              | Female        |               |           |           |
| range         | Male     | Female     | Male     | Female            | <i>N(% of</i> | <i>N(% of</i> | Male      | Female    |
| (yrs)         | <i>N</i> | <i>N</i>   | <i>%</i> | <i>%</i>          | <i>total)</i> | <i>total)</i> | <i>N</i>  | <i>N</i>  |
|               |          |            |          |                   | 67            | 71            |           |           |
| 18-24         | 172      | 178        | 38.7     | 39.7              | (13.9%)       | (14.7%)       | 17        | 18        |
|               |          |            |          |                   | 80            | 92            |           |           |
| 25-34         | 142      | 184        | 56       | 50.1              | (16.6%)       | (19%)         | 20        | 23        |
|               |          |            |          |                   | 85            | 88            |           |           |
| 35-44         | 154      | 187        | 55.5     | 47.3              | (17.6%)       | (18.2%)       | 21        | 22        |
|               |          |            |          |                   | 232           | 251           |           |           |
| Total         | 468      | 549        |          |                   | (48.1%)       | (51.9%)       | <b>58</b> | <b>63</b> |

As can be seen from Table 2, the final sample will be 58 males and 63 female smokers (N= 121). This represents 25% of the Aboriginal and Torres Strait Islander smokers aged 18-45yrs in the regional city (121/483).

## MEASURES/DATA COLLECTION

### The survey

The survey will collect quantitative data, requiring categorical responses or responses on Likert scales where appropriate, on participants' smoking behaviours, initiation of smoking, attitudes to smoking and cessation, attitudes to health risks of smoking, experiences with quit attempts and smoking cessation, and future intentions to quit smoking or seek help for quitting. The questionnaire will also elicit responses about smoking in pregnancy and the protection of babies and children from tobacco smoke. The participants will be asked to rate the level of support available from family and peers for quitting and professional support. Three open-ended questions are used in the survey: 1) to initially explore general attitudes to smoking; 2) to ascertain if there is any more the participant would like to say about smoking or quitting at the end of the interview; and 3) to elicit more detail from those who indicate that they do not want to quit smoking. The survey guide includes 'notes sections' on most of the pages, so that the interviewer can record relevant comments or narratives expressed by the participant in the course of the interview. The survey was pilot tested with an Aboriginal Health Worker (AHW), and based on this it is anticipated that it will take approximately 20 minutes for participants to complete.

The questionnaire includes several instruments:

## Tobacco Dependence Scales

Heaviness of Smoking Index (HSI) is an accepted method of assessing nicotine dependence levels, calculated from the time to first cigarette and number of cigarettes smoked per day. Its reliability has been shown to be better than the longer Fagerstrom Test for Nicotine Dependence (FTND).[62]

Strength of Urges to Smoke (SUTS) is another measure of dependence found to be more reliable for predicting cessation than the HSI.[62] It is a routine part of the "Smoking in England" survey, administered to over 10,000 smokers per annum.[63] It is a newer scale for nicotine dependence and is included here, as it has not yet been used with Australian Aboriginal and Torres Strait Islander smokers or other Indigenous populations.

## Intentions to quit

The Motivation To Stop Scale (MTSS) uses dichotomous measures (yes/no) for intentions to quit (want to quit, 'should quit', intends to quit) and has shown good level of prediction for quitting.[64] Intentions to quit and intentions to seek help (Likert scale) are also adapted from Wong & Cappella.[44]

## Risk assessment scales

1  
2  
3 The Risk Behaviour Diagnosis Scale consists of a series of questions (Likert  
4 scales) on four aspects: severity of threat, susceptibility to threat, response  
5 efficacy and self-efficacy.[40]  
6  
7  
8  
9

10  
11 As a measure of fear control responses participants will be asked to respond to  
12 four questions about reactance, avoidance and message derogation on a Likert  
13 scale.[40] Similarly for danger control responses an aggregate score of the five  
14 questions on intentions to change smoking behaviour/seek help will be  
15 calculated.[44] Because of the evidence pointing to strong protective attitudes in  
16 the target population, five questions on a Likert scale will be asked to determine  
17 protective responses about smoking in pregnancy, around children, and for  
18 Aboriginal and Torres Strait Islander peoples in general. A protection score will  
19 be calculated from these responses.  
20  
21  
22  
23  
24  
25  
26  
27  
28  
29  
30  
31  
32  
33

34  
35 The Risk Acceptance Ladder is a new measure currently being used in Italy to  
36 research a population with high rates of smoking (Cattaruzza & West, 2014, in  
37 preparation). The measure has been adapted to the Aboriginal and Torres Strait  
38 Islander population, as below.  
39  
40  
41  
42  
43  
44  
45  
46  
47  
48  
49

### 50 51 52 53 54 55 56 57 58 59 60

**Consultative process, face validity and questionnaire adaptation**

In the formative phase of the research, before ethics approvals were finalised,  
several community consultation processes were conducted. The aim was to test  
the content and face validity, suitability, readability, cultural appropriateness,



1  
2  
3 acceptability and feasibility of the survey instrument. Consultation was through  
4  
5 a focus group with Aboriginal and/or Torres Strait Islander people in the target  
6  
7 age group, and an Aboriginal elder, recruited from an Aboriginal Studies class at  
8  
9 a local tertiary college and two Aboriginal Indigenous student liaison staff from  
10  
11 the University campus (N=7). Several consultative interviews were also held  
12  
13 with a senior AHW specialising in tobacco. Expert input was obtained for the  
14  
15 scales from their respective inventors, to informally assess if they maintained  
16  
17 integrity once adapted, rather than assess their cultural suitability for this  
18  
19 population (Witte, and Cattaruzza and West).  
20  
21  
22  
23  
24

25  
26 The RBD scales were adapted to tobacco-related risks from the templates in  
27  
28 Witte's manual (see Appendix 1).[41] The community consultation group and  
29  
30 AHW requested changes to several questions and suggested additional questions  
31  
32 about reason for smoking initiation. Minor rewording was suggested for some of  
33  
34 the RBD core statements to make them more comprehensible to this population.  
35  
36 Additionally several sensitive questions about socioeconomic status and  
37  
38 pregnancy were reworded.  
39  
40  
41  
42

43  
44 The RAL was adapted for the Aboriginal and Torres Strait Islander populations,  
45  
46 and was renamed the SRAT as follows:  
47

48 (a) It was deemed more culturally appropriate to depict the measure as a target  
49  
50 with concentric circles (progressing from the outside to the centre) instead of a  
51  
52 ladder, for the Aboriginal and Torres Strait Islander population.  
53  
54  
55  
56  
57  
58  
59  
60

1  
2  
3 (b) The potential responses of the SRAT were reworded to become more  
4 appropriate for the target population, and two additional responses included  
5  
6 appropriate for the target population, and two additional responses included  
7  
8 (see Appendix 1).  
9

10  
11 Changes were approved by the HRECs.  
12

### 13 14 **ANALYSIS**

15  
16  
17 Table 3 outlines variables that will be measured.  
18  
19  
20  
21  
22  
23  
24  
25  
26  
27  
28  
29  
30  
31  
32  
33  
34  
35  
36  
37  
38  
39  
40  
41  
42  
43  
44  
45  
46  
47  
48  
49  
50  
51  
52  
53  
54  
55  
56  
57  
58  
59  
60

1  
2  
3 Table 3: Variables from questionnaire  
4  
5  
6

7 Demographics

- 8
- 9 • Age
  - 10 • Gender (Male/Female)
  - 11 • Aboriginal and Torres Strait Islander status (Aboriginal/Torres Strait
  - 12 Islander/both)
  - 13 • SES (calculated from postcode, suburb, income source, health care card
  - 14 use, education) – for details contact authors
  - 15 • Environmental variables
    - 16 a. Number of smokers in household (1/2-3/>3)
    - 17 b. Pregnant women in the house (Y/N)
    - 18 c. Children in the house (Y/N)
    - 19 d. Complete, partial or no bans for household smoking
    - 20 e. Smoke free behaviours of participants (house and car)

21  
22 Smoking behaviour variables

- 23
- 24 • Nicotine dependence scores (Heaviness of Smoking Index and SUTS)
  - 25 • Age of smoking initiation and uptake
  - 26 • Factors influencing smoking initiation (11 response options)
  - 27 • Patterns of smoking (frequency and type)
  - 28 • Smoking by others in social circle (Y/N)
  - 29 • Current/previous quit attempts (Y/N)
  - 30 • Current/previous use of cessation therapies (Y/N)
  - 31 • Level of support for quitting (social and professional) (sliding scales 0-10)

32  
33 Smoking risk related attitudes

- 34
- 35 • RBD scale resulting a composite score (discriminating value, recoded
  - 36 positive or negative)
  - 37 • Threat score (three items for susceptibility plus three for severity of threat
  - 38 on Likert scales of 1-5)
  - 39 • Efficacy score (three items for response efficacy plus three for self-efficacy
  - 40 on Likert scales of 1-5)
  - 41 • RBD results recoded into four quadrants of high efficacy/high threat;
  - 42 high efficacy/low threat; low efficacy/high threat; low efficacy/low threat;
  - 43 • Fear control responses score (calculated from questions on avoidance,
  - 44 denial, and refuting messages, Likert scales 1-5)
  - 45 • Danger control responses score (calculated from questions on intentions
  - 46 to quit or seek help, Likert scales 1-5)
  - 47 • Protective responses score (calculated from questions on attitudes about
  - 48 protecting babies/children, Likert scales 1-5)
  - 49 • General attitudes about smoking and quitting (13 response options)
  - 50 • SRAT (choice of 1 option from 12, will be reduced to 4 categories)

51  
52 Behavioural intentions

- 53
- 54 • Intentions to quit (MTSS) (want/do not want) - if affirmative then how soon
  - 55 intends to quit (3month/1 month/hope to soon/don't know)
  - 56 • Intentions to quit or reduce smoking (Wong & Capella) (Likert scales 1-4)
  - 57 • Intentions to seek help with quitting (Wong & Capella) (Likert scales 1-4)

1  
2  
3  
4  
5  
6 Legend: Y – yes; N – no; SUTS – strength of urges to smoke; RBD – risk behaviour  
7  
8  
9  
10 diagnosis; SRAT – smoking risk assessment target; MTSS – motivation to stop  
11  
12 smoking scale  
13

### 14 15 **Statistical analyses** 16

17  
18  
19 On study completion, the data entered through the survey software will be used  
20  
21 to generate a summary report and exported directly to SPSS v 20 for analysis.  
22

23 Descriptive analyses will summarise the data for all variables.  
24

25  
26 To measure the reliability and validity of the scales the following will be used.  
27

- 28  
29  
30 1. Content validity and face validity is qualitatively assessed through the  
31  
32 community panel and expert consultation for RBD and SRAT  
33
- 34  
35 2. The patterns of correlation will be explored between the RBD subscale  
36  
37 scores (susceptibility and severity of threat, and response and self-  
38  
39 efficacy) and also for danger control responses, fear control responses  
40  
41 and protective responses  
42
- 43  
44 3. Internal consistency of sub-scales will be assessed with Cronbach's  $\alpha$ .  
45

46  
47 Multivariate analyses will seek the most likely demographic predictors of  
48  
49 intentions to quit smoking/seek help for quitting, e.g. age, gender, dependence  
50  
51 levels, household smoking rules. Psychological factors such as threat and efficacy  
52  
53 scores, danger and fear control responses will be analysed to assess whether  
54  
55 they further influence the outcome measures.  
56  
57  
58  
59  
60

1  
2  
3 RBD scores and the SRAT will be examined to see if participant responses are  
4  
5 correlated.  
6  
7

8  
9 Qualitative and open-ended responses will undergo a general inductive thematic  
10  
11 analysis,[65] by two researchers independently. A cut and paste technique will  
12  
13 be used for initial coding using Excel spread sheets, and consensus reached by  
14  
15 discussion. The themes will be used to enrich the quantitative findings.  
16  
17

## 21 22 **ETHICS AND DISSEMINATION** 23 24

25  
26 The study is low risk in terms of ethics, however, discussing smoking may be  
27  
28 considered a sensitive issue for Aboriginal and Torres Strait Islander  
29  
30 participants, and researchers collecting the data will be suitably briefed. The  
31  
32 research will adhere to Australia's National Health and Medical Research  
33  
34 Council's Values and Ethics in Aboriginal and Torres Strait Islander Health  
35  
36 Research 2003 guidelines, i.e. reciprocity, respect, equality, responsibility,  
37  
38 survival and protection, spirit and integrity.[66] Examples of reciprocity include  
39  
40 the first author sharing her knowledge and skill base (as a GP and Tobacco  
41  
42 Treatment Specialist) about tobacco control and research with the participating  
43  
44 organisations and their staff members. The participants also would be offered  
45  
46 brief advice on smoking cessation if they wished after the interview, and extra  
47  
48 resources such as a culturally adapted DVD. The primary HREC is the Aboriginal  
49  
50 Health & Medical Research Council Ethics Committee (AH&MRC), which  
51  
52 approved the study with support from the partnering ACCHS (approval number  
53  
54  
55  
56  
57  
58  
59  
60

1  
2  
3 928). Additional HRECs ratified the primary approval (James Cook University  
4  
5 (H4467) and Southern Cross University (ECN-13-242).  
6  
7

8  
9  
10 Participants will be approached at community events that are targeted to the  
11  
12 local Australian Aboriginal and Torres Strait Islander communities. Potential  
13  
14 recruits will be asked if they fulfil the selection criteria and canvassed about  
15  
16 their willingness to join in the study. All participants will be provided with a  
17  
18 participant information sheet advising of the purpose of the study and  
19  
20 implications regarding:  
21

- 22 • Objectives of the research
- 23 • Why the information is being collected and how it will be used, accessed  
24 and stored
- 25 • Voluntary nature of the study, provision for withdrawal of consent,  
26 assurance of confidentiality and anonymity  
27  
28  
29  
30  
31  
32  
33

34  
35  
36  
37 After the information sheet is explained, the participant will be asked to provide  
38  
39 informed consent by having their name typed on the touch screen of the tablet  
40  
41 computer and ticking the 'agree' box. All data will be de-identified and data and  
42  
43 materials will be stored for seven years, in a secure location, and where digitally  
44  
45 stored will be password-protected and only accessed by the researchers.  
46  
47  
48

49  
50  
51 This study is one of several studies contributing to a PhD Public Health thesis for  
52  
53 the first author. Journal articles and presentations at relevant national and  
54  
55 international conferences to academics, researchers and stakeholders will  
56  
57 disseminate these findings. The outcomes of the study will also inform policy and  
58  
59  
60

1  
2  
3 practice recommendations. A community report will be sent to the partnering  
4  
5 ACCHS for dissemination to clients at the service and to the communities who  
6  
7 have been involved. Community-based forums will be held as appropriate.  
8  
9

## 10 11 12 13 14 **DISCUSSION**

15  
16  
17 This study aims to determine how Australian Aboriginal and Torres Strait  
18  
19 Islander smokers of childbearing age assess risks about tobacco smoking and  
20  
21 how these assessments are associated with their intentions to quit smoking. We  
22  
23 aim to validate two risk assessment scales for Aboriginal and Torres Strait  
24  
25 Islander smokers, which could have the potential for research transference to a  
26  
27 clinical or public health setting.  
28  
29

30  
31  
32 The RBD scale was originally designed as a clinical tool to be used in the context  
33  
34 of delivering tailored health messages at a clinic for sexually transmitted  
35  
36 diseases and HIV testing.[40] Advice was then adapted to individuals according  
37  
38 to their responses.  
39  
40

41  
42 Primary health care practitioners and clinicians are often faced with the task of  
43  
44 assisting Aboriginal and Torres Strait Islander smokers to quit smoking. Anti-  
45  
46 tobacco messages do not just lie in the domain of social marketing: they also  
47  
48 need to be carefully pitched to maximise receptivity and support behaviour  
49  
50 change within the clinical consultation. Little is known about the effectiveness of  
51  
52 smoking behaviour change models for Aboriginal and Torres Strait Islander  
53  
54 peoples. The trans-theoretical model (stages of change or SOC) has been widely  
55  
56  
57  
58  
59  
60

1  
2  
3 used in Australia for Aboriginal and Torres Strait Islander smokers, but  
4  
5 outcomes have never been evaluated.[67] Aboriginal smokers in remote areas  
6  
7 have been described as more likely to be in the pre-contemplative or  
8  
9 contemplative stages of change and require more assistance to be ready to quit  
10  
11 smoking.[68] Also it is known that motivational interviewing, including that  
12  
13 based on the SOC, is not as effective in pregnancy as in the general  
14  
15 population,[69] and holds no special advantages over other types of psychosocial  
16  
17 counselling.[70]  
18  
19

20  
21  
22 If the measures under examination here are found to be reliable for the target  
23  
24 audience of Aboriginal and Torres Strait Islander smokers of childbearing age,  
25  
26 then accurate assessments could be made. A new model based on assessment of  
27  
28 risk behaviour could have the potential to assess fear versus danger control  
29  
30 responses and facilitate the pitching of tailored anti-tobacco messages for the  
31  
32 individual, build motivational tension for quitting, and yet avoid engendering  
33  
34 fear control responses or resistance.  
35  
36

37  
38  
39 If people are engaged in fear control processes, messages developed should focus  
40  
41 on the efficacy of the recommended response to counteract the high levels of  
42  
43 perceived threat. Focusing on threat messages alone may cause the messages to  
44  
45 backfire. It is important to emphasise that the recommended responses are  
46  
47 feasible and effective to avert the threat from smoking. It is essential to help  
48  
49 people develop a belief in their ability to quit smoking, develop supportive  
50  
51 environments for quitting, and provide easy access to treatment.  
52  
53  
54  
55  
56  
57  
58  
59  
60



1  
2  
3 Central to building self-efficacy are strategies recommended by Bandura.[42] He  
4  
5 suggests several approaches: building skills, self-control and mastery for  
6  
7 quitting; learning about the experiences of others who have successfully quit;  
8  
9 verbal persuasion and motivation; helping people adopt a positive mindset; and  
10  
11 importantly having access to effective therapies.[42]  
12

13  
14  
15 Alternatively, if the target audience is in danger control, messages can remind  
16  
17 people about the threat of smoking to maintain motivation, whilst also  
18  
19 increasing efficacy for quitting, as above.  
20  
21

22  
23 People with low threat perceptions may be neither in danger or fear control.  
24  
25 They may need to be convinced about the seriousness of or their susceptibility to  
26  
27 the threat. This group requires messages aimed at improving knowledge and  
28  
29 correcting any misconceptions. This may be best achieved by having messages  
30  
31 come from someone who is very similar to the client (possibly through use of  
32  
33 tailored videos or personalised narratives).  
34  
35

36  
37  
38 The SRAT may prove a simplified way to approach risk assessment in this target  
39  
40 group, as it demands a single response to a question. The measures require  
41  
42 validation for Aboriginal and Torres Strait Islander smokers in this child-rearing  
43  
44 age bracket, prior to a more formal assessment of feasibility and effectiveness in  
45  
46 a clinical setting.  
47  
48

49  
50 Previous research has demonstrated the strong social and environmental  
51  
52 influences on smoking cessation, and the role health professionals play in  
53  
54 supporting smoking cessation in Aboriginal and Torres Strait Islander  
55  
56 communities.[71] The study will also assess predictors of intentions to quit that  
57  
58  
59  
60

1  
2  
3 include measures of socio-economic position, smoking by friends, and household  
4  
5 members, support offered by family and health professionals, and a range of  
6  
7 other factors. These measures have the potential to determine social and health  
8  
9 profession influences on intentions to quit smoking in this population. The  
10  
11 analysis will determine if once these factors are controlled for whether the  
12  
13 responses to the risk assessment measures have any additional impact.  
14  
15  
16  
17  
18  
19  
20

### 21 **Limitations and Strengths**

22  
23  
24 The study will be based on a sample from one regional area of NSW, fostering  
25  
26 ownership of the project results for the local partnering ACCHS. Australian  
27  
28 Aboriginal groups are diverse and this study will be conducted in just one region.  
29  
30 It is unknown how many Torres Strait Islanders reside in the area and how  
31  
32 many will chose to participate in the study. As the validity and reliability  
33  
34 measures to be used are context specific, they should be considered provisional,  
35  
36 pending a larger study. These limitations impact on generalisability and  
37  
38 transferability of the findings, although this is a pragmatic constraint for all  
39  
40 research in diverse Indigenous groups. Selection bias may be operant if only  
41  
42 those more willing to talk about their smoking agreeing to participate, another  
43  
44 inevitable challenge for this kind of research. Recruiting some participants  
45  
46 through a health service may favour those already with health problems, and  
47  
48 who may already have motivation to quit smoking. There could be information  
49  
50 biases: smoking status will be based on self-report and not any objective  
51  
52 measures; recall bias may be operant with asking people to recollect their  
53  
54  
55  
56  
57  
58  
59  
60

1  
2  
3 smoking history and perceived level of support for quitting; and social  
4  
5 desirability bias with people reporting what they think the researcher wants to  
6  
7 hear.  
8  
9

10  
11 On the other hand, this is the first study as far as we know to validate risk  
12  
13 assessment measures for tobacco smoking in a population of Aboriginal and  
14  
15 Torres Strait Islander smokers. Health education and behaviour studies are  
16  
17 tested for validity and reliability inconsistently,[72] and very few scales are  
18  
19 validated for the Aboriginal and Torres Strait Islander population.[73] So the  
20  
21 study is needed and an important one, although small and specific to one region.  
22  
23 The study takes a unique approach to smoking in Aboriginal and Torres Strait  
24  
25 Islander peoples of childbearing age by drawing on both well-established and  
26  
27 new measures from the health communication and addiction fields. If these  
28  
29 measures prove to be valid and reliable they have a high potential for research  
30  
31 translation into clinical settings. The outcomes could further inform the  
32  
33 development and refining of social marketing policies and strategies for anti-  
34  
35 tobacco messages through all media.  
36  
37  
38  
39  
40  
41  
42  
43  
44  
45  
46  
47  
48  
49  
50  
51  
52  
53  
54  
55  
56  
57  
58  
59  
60

## ACKNOWLEDGEMENTS

We acknowledge the valuable input of the Aboriginal community panel and the support of the partnering ACCHS for this survey, and role of the Aboriginal Health Worker in the study, without them the study would not be possible.

## AUTHOR CONTRIBUTIONS

GSG is responsible for the concept and design of the project, developing and adapting the survey instruments and digital format, testing the suitability of the survey for Indigenous participants, conducting surveys, training and supervising Indigenous research assistants to conduct surveys, collating and analysing and interpreting results, writing reports and manuscripts.

KW contributed to the research design and statistical analysis and critical review of manuscripts. AM advises on any aspect relating to tobacco smoking, smoking risk behaviours and the survey, and critical review of manuscripts. YCJ as Aboriginal academic advisor advises on the Indigenous community consultation processes, recruitment and the cultural interpretation of results. ARC oversees the study and advises on all aspects, and provides critical review of manuscripts.

## FUNDING

This study was funded by the following grants awarded to GSG as principal researcher:

- National Health and Medical Research Council (Australia) and National Heart Foundation (Australia) post-graduate scholarship for Indigenous health research - APP1039759 and PP 11S 6181
- Royal Australian College of General Practitioners and Australian Primary Health Care Research Institute Indigenous Health Award 2013
- James Cook University, Faculty of Medicine, Health & Molecular Sciences, Graduate Research Scheme grant 2013

ARC holds a National Health and Medical Research Council Career Development Award (APP1046773)

#### **COMPETING INTERESTS**

AM receives a personal income from Cancer Research UK via University College London. He has received travel funding, honorariums and consultancy payments from manufacturers of smoking cessation products (Pfizer Ltd, Novartis UK and GSK Consumer Healthcare Ltd). He also receives payment for providing training to smoking cessation specialists; receives royalties from books on smoking cessation and has a share in a patent of a nicotine delivery device.

No other competing interests to declare.

**REFERENCES**

1. OECD. OECD Factbook 2013: Economic, Environmental and Social Statistics: Smoking: OECD Publishing; 2013.
2. Baker A, Ivers RG, Bowman J, et al. Where there's smoke, there's fire: high prevalence of smoking among some sub-populations and recommendations for intervention. *Drug Alcohol Rev* 2006;25(1):85-96.
3. Vos T, Barker B, Stanley L, et al. The burden of disease and injury in Aboriginal and Torres Strait Islander peoples 2003. Brisbane: The University of Queensland; 2007.
4. Australian Bureau of Statistics. 4727.0.55.001 - Australian Aboriginal and Torres Strait Islander Health Survey: First Results, Australia, 2012-13 Canberra: Australian Bureau of Statistics; 27/11/2013 [cited 2013 28 November]; Available from:  
<http://www.abs.gov.au/ausstats/abs@.nsf/Lookup/39E15DC7E770A144CA257C2F00145A66?opendocument>.

- 1  
2  
3 5. Robertson J, Conigrave K, Ivers R, et al. Addressing high rates of smoking  
4  
5 in remote Aboriginal communities: New evidence for GPs. *Aust Fam Physician*  
6  
7 2013;42(7):492-6.  
8
- 9  
10 6. Li Z, Zeki R, Hilder L, et al. Australia's mothers and babies 2010. In:  
11  
12 National Perinatal Epidemiology and Statistics Unit, editor. Sydney: Australian  
13  
14 Institute of Health and Welfare; 2011. Canberra: Australian Institute of Health  
15  
16 and Welfare (AIHW) National Perinatal Epidemiology and Statistics Unit; 2012.  
17
- 18  
19 7. DiGiacomo M, Davidson PM, Abbott PA, et al. Smoking cessation in  
20  
21 indigenous populations of Australia, New Zealand, Canada, and the United States:  
22  
23 Elements of effective interventions. *Int J Environ Res Public Health*  
24  
25 2011;8(2):388-410  
26
- 27  
28 8. Freemantle J, Officer K, McAullay D, et al. Australian Indigenous Health—  
29  
30 Within an International Context, . Darwin: Cooperative Research Centre for  
31  
32 Aboriginal Health, 2007.  
33
- 34  
35 9. Carson KV, Robertson TA, Brinn MP, et al. Tobacco use, cessation and  
36  
37 prevention for Indigenous populations: Review of current evidence and future  
38  
39 perspectives. In: Jackson OT EK, ed. *Health Disparities: Epidemiology,*  
40  
41 *Racial/Ethnic and Socioeconomic Risk Factors and Strategies for Elimination.*  
42  
43 New York: Nova Science Publishers, 2013:1-38.  
44
- 45  
46 10. Brady M. Historical and cultural roots of tobacco use among Aboriginal  
47  
48 and Torres Strait Island people. *Aust NZ J Public Health* 2002;26(2):120-4.  
49
- 50  
51 11 Thomas DP, Briggs V, Anderson I, et al. The social determinants of being  
52  
53 an Indigenous non-smoker. *Aust NZ J Public Health* 2008;32(2):110-6.  
54  
55  
56  
57  
58  
59  
60

- 1  
2  
3 12. Paradies Y, Harris R, & Anderson I. The Impact of Racism on Indigenous  
4 Health in Australia and Aotearoa: Towards a Research Agenda, Discussion Paper  
5 No. 4. Darwin: Cooperative Research Centre for Aboriginal Health 2008.  
6  
7  
8  
9  
10 13. Gould GS, Munn J, Watters T, et al. Knowledge and views about maternal  
11 tobacco smoking and barriers for cessation in Aboriginal and Torres Strait  
12 Islanders: A systematic review and meta-ethnography. *Nicotine Tob Res*  
13 2013;15(5):863-74.  
14  
15  
16  
17  
18 14. Johnston V, Thomas DP. Smoking behaviours in a remote Australian  
19 Indigenous community: The influence of family and other factors. *Soc Sci Med*  
20 2008;67(11):1708-16.  
21  
22  
23  
24  
25 15. Passey M, Gale JT, Sanson-Fisher RW. "It's almost expected": rural  
26 Australian Aboriginal women's reflections on smoking initiation and  
27 maintenance: a qualitative study. *BMC Womens Health* 2011;11(55).  
28  
29  
30  
31  
32 16. Winstanley M, van der Sterren A, Knoche D. Chapter 8. Tobacco use  
33 among Aboriginal peoples and Torres Strait Islanders in Scollo MM and  
34 Winstanley MH, eds. *Tobacco in Australia: Facts and issues*. 4th edn. Melbourne:  
35 Cancer Council Victoria; 2012.  
36  
37  
38  
39  
40  
41 17. Johnston F, Beecham R, Dagleish P, et al. The Maningrida: 'Be Smoke  
42 Free' project. *Health Promot J Austr* 1998;8(1):12-17.  
43  
44  
45  
46 18. Zuo Y, Minniecon S, Hua M. 'If you want your life to end bad, go ahead  
47 and smoke': a focus group study of Aboriginal and Torres Strait Islander young  
48 people's attitudes and knowledge towards smoking. *Health Promot J Austr*  
49 2004;15(1): 82-83.  
50  
51  
52  
53  
54  
55  
56  
57  
58  
59  
60



- 1  
2  
3 19. Stewart HS, Bowden JA, Bayly MC, et al. Potential effectiveness of specific  
4 anti-smoking mass media advertisements among Australian Indigenous  
5 smokers. *Health Educ Res* 2011;26(6):961-75.  
6  
7  
8  
9  
10 20. Gould GS, Watt K, Stevenson L, et al. Developing anti-tobacco messages for  
11 Australian Aboriginal and Torres Strait Islander peoples: evidence from a  
12 national cross-sectional survey. *BMC Public Health* 2014;14(1): 250. doi:  
13 10.1186/1471-2458-14-250  
14  
15  
16  
17  
18  
19 21. Boyle T, Shepherd CCJ, Pearson G, et al. Awareness and impact of the  
20 'Bubblewrap' advertising campaign among Aboriginal smokers in Western  
21 Australia. *Tob Control* 2010;19(1):83-86  
22  
23  
24  
25  
26 22. Ivers R, Castro A, Parfitt D, et al. Television and delivery of health  
27 promotion programs to remote Aboriginal communities. *Health Promot J Austr*  
28 2005;16(2):155-58  
29  
30  
31  
32 23. Vogeltanz-Holm N, Holm J, White Plume J, et al. Confirmed Recall and  
33 Perceived Effectiveness of Tobacco Countermarketing Media in Rural Youth.  
34 *Prev Sci* 2009;10(4):325-34 doi: 10.1007/s11121-009-0134-0.  
35  
36  
37  
38  
39 24. Grigg M, Waa A, Bradbrook SK. Response to an Indigenous smoking  
40 cessation media campaign: it's about whanau. *Aust NZ J Public Health*  
41 2008;32(6):559-64  
42  
43  
44  
45  
46 25. Gould GS, McEwen A, Watters T, et al. Should anti-tobacco media  
47 messages be culturally targeted for Indigenous populations? A systematic review  
48 and narrative synthesis. *Tob Control* 2013;22(4):e7 doi:  
49 10.1136/tobaccocontrol-2012-050436  
50  
51  
52  
53  
54  
55 26. Australian Government. Indigenous Anti-Smoking Campaign: Break the  
56 Chain - Quantitative Campaign Effectiveness: Research - Executive Summary.  
57  
58  
59  
60

1  
2  
3 Secondary Indigenous Anti-Smoking Campaign: Break the Chain - Quantitative  
4  
5 Campaign Effectiveness: Research - Executive Summary 30 May 2012 October  
6  
7 2011.

8  
9  
10 <http://www.quitnow.gov.au/internet/quitnow/publishing.nsf/Content/ntc->  
11  
12 [break-the-chain.](http://www.quitnow.gov.au/internet/quitnow/publishing.nsf/Content/ntc-break-the-chain)

13  
14 27. Bramley D, Riddell T, Whittaker R, et al. Smoking cessation using mobile  
15  
16 phone text messaging is as effective in Maori as non-Maori. N Z Med J  
17  
18 2005;118:1216

19  
20 28. Wood L, France K, Hunt K, et al. Indigenous women and smoking during  
21  
22 pregnancy: Knowledge, cultural contexts and barriers to cessation. Soc Sci Med  
23  
24 2008;66(11):2378-89 doi: 10.1016/j.socscimed.2008.01.024

25  
26 29. Gilligan C, Sanson-Fisher RW, D'Este C, et al. Knowledge and attitudes  
27  
28 regarding smoking during pregnancy among Aboriginal and Torres Strait  
29  
30 Islander women. Med J Aust 2009;190(10):557-61

31  
32 30. Passey M, Gale J, Holt B, et al. Stop smoking in its tracks: understanding  
33  
34 smoking by rural Aboriginal women: Cairns, Qld: The 10th National Rural Health  
35  
36 Conference, 2009.

37  
38 31. Douglas TA, Buettner PG, Whitehall J. Maternal awareness of sudden  
39  
40 infant death syndrome in North Queensland, Australia: An analysis of infant care  
41  
42 practices. J Paediatr Child Health 2001;37(5):441-45

43  
44 32. Wilson G. What do Aboriginal women think is good antenatal care?:  
45  
46 consultation report Alice Springs, N. T.: Cooperative Research Centre for  
47  
48 Aboriginal Health, 2009.

- 1  
2  
3 33. Heath DL, Panaretto K, Manassis V, et al. Factors to consider in smoking  
4 interventions for indigenous women. *Aust J Prim Health* 2006;12(2): 131-36 doi:  
5 10.1071/PY06032  
6  
7  
8  
9  
10 34. Gould GS, Munn J, Avuri S, et al. "Nobody smokes in the house if there's a  
11 new baby in it": Aboriginal perspectives on tobacco smoking in pregnancy and in  
12 the household in regional NSW Australia. *Women Birth* 2013;26(4):246-53.  
13  
14  
15  
16 35. Passey M, D'Este CA, Stirling JM, et al. Factors associated with antenatal  
17 smoking among Aboriginal and Torres Strait Islander women in two  
18 jurisdictions. *Drug Alcohol Rev* 2012;31(5):608-16.  
19  
20  
21  
22  
23 36. Patten CA, Windsor RA, Renner CC, et al. Feasibility of a tobacco cessation  
24 intervention for pregnant Alaska Native women. *Nicotine Tob Res*  
25 2010;12(2):79-87  
26  
27  
28  
29  
30 37. Ivers R. Anti-tobacco programs for Aboriginal and Torres Strait Islander  
31 people In: *Closing the Gap Clearinghouse AloHaW*, editor. Canberra: Australian  
32 Government; 2011.  
33  
34  
35  
36  
37 38. Australian Department of Health and Ageing. Developmental Research to  
38 inform the National Action to Reduce Smoking Rates Social Marketing Campaign.  
39 2010 [updated 2010, Dec 7, 2011, November 20]; Available from:  
40 [http://www.health.gov.au/internet/ctg/publishing.nsf/Content/development-](http://www.health.gov.au/internet/ctg/publishing.nsf/Content/development-market-research)  
41 [market-research](http://www.health.gov.au/internet/ctg/publishing.nsf/Content/development-market-research).  
42  
43  
44  
45  
46  
47  
48 39. Witte K, Allen M. A Meta-Analysis of Fear Appeals: Implications for  
49 Effective Public Health Campaigns. *Health Educ Behav* 2000;27(5):591-615.  
50  
51  
52  
53 40. Witte K, Cameron KA, McKeon JK, et al. Predicting Risk Behaviors:  
54 Development and Validation of a Diagnostic Scale. *J Health Commun* 1996;1:317-  
55  
56  
57  
58  
59  
60

- 1  
2  
3 41.. Witte K, Meyer G, Martell D. Effective health risk messages: a step-by-step  
4  
5 guide. Thousand Oaks, CA: Sage Publications; 2001.  
6  
7 42. Bandura A. Health Promotion by Social Cognitive Means. Health Educ  
8  
9 Behav 2004;31:143-64.  
10  
11 43. Maloney EK, Lapinski MK, Witte K. Fear Appeals and Persuasion: A  
12  
13 Review and Update of the Extended Parallel Process Model. Soc Personal Psychol  
14  
15 Compass 2011;5(4):206-19.  
16  
17 44. Wong NCH, Cappella JN. Antismoking Threat and Efficacy Appeals: Effects  
18  
19 on Smoking Cessation Intentions for Smokers with Low and High Readiness to  
20  
21 Quit. J Appl Commun Res 2009;37(1):1-20.  
22  
23 45. Guidry JJ, Fagan P, Walker V. Cultural sensitivity and readability of breast  
24  
25 and prostate printed cancer education materials targeting African Americans. J  
26  
27 Natl Med Assoc 1998;90(3):165-9.  
28  
29 46. Lee HS, Park JS. Cultural orientation and the persuasive effects of fear  
30  
31 appeals: The case of anti-smoking public service announcements. J of Med  
32  
33 Marketing 2012;12(2):73-80.  
34  
35 47. Murray-Johnson L, Witte K, Boulay M, et al. Using health education  
36  
37 theories to explain behavior change: A cross-country analysis. Int Q Community  
38  
39 Health Educ 2006;25(1-2):185-207.  
40  
41 48. Muthusamy N, Levine TR, Weber R. Scaring the Already Scared: Some  
42  
43 Problems With HIV/AIDS Fear Appeals in Namibia. Journal of Communication  
44  
45 2009;59(2):317-44.  
46  
47 49. Smith RA, Ferrara M, Witte K. Social Sides of Health Risks: Stigma and  
48  
49 Collective Efficacy. Health Commun 2007;21(1):55-64.  
50  
51  
52  
53  
54  
55  
56  
57  
58  
59  
60

- 1  
2  
3 50. Sobre-Denton M, Hart D. Mind the gap: Application-based analysis of  
4 cultural adjustment models. *Int J Intercult Relat* 2008;32(6):538-52.  
5  
6  
7 51. Terblanche-Smit M, Terblanche NS. Race and attitude formation in  
8 HIV/Aids fear advertising. *J Bus Res* 2010;63(2):121-5.  
9  
10  
11 52. Witte K, Berkowitz JM, Lillie JM, et al. Radon Awareness and Reduction  
12 Campaigns for African Americans: A Theoretically Based Evaluation. *Health Educ*  
13 *Behav* 1998;25(3):284-303.  
14  
15  
16 53. Witte K. A Theoretically Based Evaluation of HIV / AIDS Prevention  
17 Campaigns Along the Trans-Africa Highway in Kenya. *J Health Commun*  
18 1998;3(4):345-63.  
19  
20  
21 54. West R. *Theory of Addiction*. Oxford: Blackwell; 2006.  
22  
23  
24 55. West R. The multiple facets of cigarette addiction and what they mean for  
25 encouraging and helping smokers to stop. *COPD* 2009;6(4):277-83.  
26  
27  
28 56. Cattaruzza MS, West R. Why do doctors and medical students smoke  
29 when they must know how harmful it is? *Eur J Public Health* 2013;23 (2): 188-  
30 89.  
31  
32  
33 57. Berry J, Poortinga Y, Segall M, et al. *Cross-cultural psychology: research*  
34 *and applications*. Chapter 1: Introduction to Cross Cultural Psychology, p 1-15.  
35 2nd ed. Cambridge: Cambridge University Press, 2002.  
36  
37  
38 58. Drew N, Adams Y, Walker R. Issues in Mental Health Assessment with  
39 indigenous Australians. In: Purdie N, Dudgeon P, Walker R, eds. *Working*  
40 *Together: Aboriginal and Torres Strait Islander Mental Health and Wellbeing*  
41 *Principles and Practice*. Canberra: Department of Health and Ageing, 2010.  
42  
43  
44 59. Altman D. *Practical statistics for medical research*. London: Chapman and  
45 Hall; 1991.  
46  
47  
48  
49  
50  
51  
52  
53  
54  
55  
56  
57  
58  
59  
60

- 1  
2  
3 60. Tabachnik BG, & Fidel LS. Using Multivariate Statistics (6th Edition):  
4  
5 Pearson, 2013  
6  
7  
8 61. ABS. National Aboriginal and Torres Strait Islander Social Survey 2008.  
9  
10 Canberra: Australian Bureau of Statistics; 2009.  
11  
12 <http://www.abs.gov.au/ausstats/abs@.nsf/mf/4714.0/>  
13  
14 62. Fidler J, Shahab L, West R. Strength of urges to smoke as a measure of  
15  
16 severity of cigarette dependence: comparison with the Fagerstrom Test for  
17  
18 Nicotine Dependence and its components. *Addiction* 2011;106(3):631-8.  
19  
20  
21 63. Fidler JA, Shahab L, West O, et al. 'The smoking toolkit study': a national  
22  
23 study of smoking and smoking cessation in England. *BMC Public Health*  
24  
25 2011;11:479.  
26  
27  
28 64. Kotz D, Brown J, West R. Predictive validity of the Motivation To Stop  
29  
30 Scale (MTSS): a single-item measure of motivation to stop smoking. *Drug Alcohol*  
31  
32 *Depend* 2013;128(1-2):15-9.  
33  
34  
35 65. Thomas DR. A General Inductive Approach for Analyzing Qualitative  
36  
37 Evaluation Data. *Am J Eval* 2006;27(2):237-46 doi:  
38  
39 10.1177/1098214005283748[published Online First: Epub Date]].  
40  
41  
42 66. NHMRC. Values and Ethics: Guidelines for Ethical Conduct in Aboriginal  
43  
44 and Torres Strait Islander Health Research. Canberra, ACT: Commonwealth of  
45  
46 Australia; 2003.  
47  
48  
49 67. Centre for Health Advancement - Population Health Division. The NSW  
50  
51 SmokeCheck Aboriginal Tobacco Prevention Project 2007 - 2008 final report:  
52  
53 NSW Department of Health 2010.  
54  
55  
56 68. Campbell S BI, Swinbourne A, Cadet-James Y, et al. Stages of Change,  
57  
58 Smoking Behaviour and Readiness to Quit in a Large Sample of Indigenous  
59  
60

1  
2  
3 Australians Living in Eight Remote North Queensland Communities. *Int J Environ*  
4  
5 *Res Public Health* 2013;10(4):1562-71.

6  
7 69. Hettema JE, Hendricks PS. Motivational interviewing for smoking  
8  
9 cessation: a meta-analytic review. *J Consult Clin Psychol* 2010;78(6):868-84 doi:  
10  
11 10.1037/a0021498.

12  
13 70. Chamberlain C, O'Mara-Eves A, Oliver S, et al. Psychosocial interventions  
14  
15 for supporting women to stop smoking in pregnancy. *Cochrane Database Syst*  
16  
17 *Rev* 2013, Issue 10. Art. No.: CD001055. doi: 10.1002/14651858.CD001055.pub4

18  
19 71. Passey M, D'Este CA, Sanson-Fisher R. Knowledge, attitudes and other  
20  
21 factors associated with assessment of tobacco smoking among pregnant  
22  
23 Aboriginal women by health care providers: a cross-sectional survey. *BMC Public*  
24  
25 *Health* 2012;12(165) doi: 10.1186/1471-2458-12-165.

26  
27 72. Barry AE, Chaney B, Piazza-Gardner AK, et al. Validity and Reliability  
28  
29 Reporting Practices in the Field of Health Education and Behavior: A Review of  
30  
31 Seven Journals. *Health Educ Behav* 2013;Apr 3. doi:  
32  
33 10.1177/1090198113483139

34  
35 73. Stephens A, Bohanna I, Graham D, et al. Screening and assessment  
36  
37 instruments for use in Indigenous-specific alcohol and drug treatment  
38  
39 rehabilitation. *Journal of Tropical Psychology* 2013;3. doi: 10.1017/jtp.2013.2  
40  
41  
42  
43  
44  
45  
46  
47  
48  
49  
50  
51  
52  
53  
54  
55  
56  
57  
58  
59  
60

1  
2  
3  
4  
5  
6 **STUDY PROTOCOL - VALIDATION OF RISK ASSESSMENT SCALES IN A CROSS-**  
7 **SECTIONAL SURVEY OF ATTITUDES TO TOBACCO SMOKING AND**  
8 **INTENTIONS TO QUIT SMOKING IN AUSTRALIAN ABORIGINAL AND TORRES**  
9 **STRAIT ISLANDER PEOPLES AND PREDICTORS OF INTENTIONS TO QUIT**  
10 **SMOKING IN AUSTRALIAN ABORIGINAL AND TORRES STRAIT ISLANDER**  
11 **PEOPLES: A CROSS-SECTIONAL SURVEY PROTOCOL**  
12  
13  
14  
15  
16  
17  
18  
19

20  
21 **Title Page**  
22  
23  
24  
25

26 Dr. Gillian Sandra Gould corresponding author  
27

28  
29 PO Box 9077  
30

31  
32 Moonee Beach, New South Wales, 2450  
33

34  
35 Australia  
36

37  
38 Email: [gillian.gould1@my.jcu.edu.au](mailto:gillian.gould1@my.jcu.edu.au)  
39

40  
41 Tel: +61 403615563  
42

43  
44 Fax: +612 66519365  
45

46  
47  
48  
49 Authors:  
50  
51  
52  
53  
54  
55  
56  
57  
58  
59  
60



1  
2  
3  
4  
5  
6 Gillian Sandra Gould  
7

8  
9 School of Public Health, Tropical Medicine and Rehabilitation Sciences  
10

11 James Cook University  
12

13 PO Box 6811  
14

15  
16  
17 Cairns, Queensland, 4870  
18

19  
20  
21 Australia  
22

23  
24  
25  
26  
27 Southern Cross University  
28

29  
30 Hogbin Drive  
31

32  
33 Coffs Harbour, [New South Wales](#), 2450  
34

35  
36 Australia  
37

38  
39  
40  
41 Kerriane Watt  
42

43  
44  
45 School of Public Health, Tropical Medicine and Rehabilitation Sciences  
46

47 James Cook University  
48

49  
50  
51 Townsville, Queensland, 4811  
52

53  
54 Email: [kerriane.watt@jcu.edu.au](mailto:kerriane.watt@jcu.edu.au)  
55  
56  
57

1  
2  
3  
4  
5  
6  
7  
8  
9 Andy McEwen

10 Health Behaviour Research Centre

11  
12  
13 Epidemiology and Public Health

14  
15  
16  
17 University College London

18  
19  
20  
21 London

22  
23  
24 United Kingdom

25  
26  
27 Email: [andy.mcewen@ucl.ac.uk](mailto:andy.mcewen@ucl.ac.uk)

28  
29  
30  
31  
32  
33 Yvonne Cadet-James

34  
35  
36 School of Indigenous Australian Studies

37  
38  
39 James Cook University

40  
41  
42 Townsville, Queensland

43  
44  
45 Australia

46  
47  
48 Email: [yvonne.cadetjames@jcu.edu.au](mailto:yvonne.cadetjames@jcu.edu.au)

49  
50  
51  
52  
53 Alan R Clough

1  
2  
3  
4  
5  
6 [School of Public Health, Tropical Medicine and Rehabilitation Sciences Australian](#)

7  
8 [Institute of Tropical Health and Medicine](#)

9  
10  
11 James Cook University

12  
13 PO Box 6811

14  
15  
16  
17 Cairns, Queensland, 4870

18  
19  
20 Australia

21  
22  
23 Email: [alan.clough@jcu.edu.au](mailto:alan.clough@jcu.edu.au)

24  
25  
26  
27  
28  
29  
30  
31  
32 Running Head: Risk assessment for smoking with Indigenous Australians

33  
34  
35  
36  
37  
38 *Key words: tobacco use, smoking, Australian Aborigines, Indigenous population, risk*  
39 *behaviours, ~~health attitudes~~*

40  
41  
42  
43  
44  
45  
46 Word Count: ~~47873883~~

**ABSTRACT:****Introduction**

Tobacco smoking is a very significant behavioural risk factor for the health of Australian Aboriginal and Torres Strait Islanders, and is embedded as a social norm. With a focus on women of child-bearing age, and men of similar age, this project aims to determine how Aboriginal and Torres Strait Islander smokers assess smoking risks and how these assessments contribute to their intentions to quit. The findings from this pragmatic study should contribute to developing culturally targeted interventions.

**Methods and analysis**

A cross-sectional study using quantitative and qualitative data. 120 Aboriginal and Torres Strait Islander community members aged 18-45 years will be recruited at community events and through an Aboriginal Community Controlled Health Service (ACCHS). Participants will be interviewed using a tablet computer or paper survey. The survey instrument uses modified risk behaviour scales, i.e. the Risk Behaviour Diagnosis (RBD) Scale and the Smoking Risk Assessment Target (SRAT) (adapted from the Risk Acceptance Ladder) to determine whether attitudes of Aboriginal and Torres Strait Islander smokers to health risk messages are predictors of intentions to quit smoking.

The questionnaire will be assessed for face and content validity with a panel of Indigenous community members. The internal consistency of the RBD subscales

1  
2  
3  
4  
5  
6 and their patterns of correlation will be explored. Multivariate analyses will  
7  
8 examine predictors of intentions to quit. This will include demographics such as  
9  
10 age, gender, nicotine dependence, household smoking rules, and perceived  
11  
12 threat from smoking and efficacy for quitting. The two risk assessment scales  
13  
14 will be examined to see if participant responses are correlated.  
15

### 16 17 **Ethics and dissemination**

18  
19  
20 The Aboriginal Health & Medical Research Council [Ethics Committee](#) and ethics  
21  
22 committees at James Cook and Southern Cross Universities approved the study.  
23  
24 The results will be published in a peer-reviewed journal and a community report  
25  
26 will be disseminated by the ACCHS, and at community forums.  
27  
28  
29  
30  
31  
32  
33  
34  
35  
36  
37  
38  
39  
40  
41  
42  
43  
44  
45  
46  
47  
48  
49  
50  
51  
52  
53  
54  
55  
56  
57  
58  
59  
60

Note about terminology:

We use the term Aboriginal and Torres Strait Islander peoples, except where previous research has reported findings from only one group e.g. Aboriginal people. Indigenous is used here to refer to Indigenous peoples in the international context, and issues, policies or systems, e.g. Indigenous health, Indigenous tobacco control.

## ARTICLE SUMMARY

### Article focus

- Limited knowledge of [how smoking behaviours and attitudes in Aboriginal and Torres Strait Islander peoples of childbearing age assess the risks about smoking, and their levels of efficacy for cessation](#)
- Study aims to validate risk assessment scales for Aboriginal and Torres Strait Islander smokers in [New South Wales \(NSW\)](#) Australia
- Study has potential to inform anti-tobacco messages used in social marketing and counselling approaches in clinical consultations
- Privileges the voices of Aboriginal and Torres Strait Islander peoples

### Key Messages

- A better understanding of attitudes and experiences of smoking and quitting in this age group will add to current knowledge and could assist in better management of smoking

- Correlations of smokers' attitudes, perceptions of threat and efficacy with intentions to quit smoking will aid the development of tailored approaches

### Strengths and Limitations of this Study

- First study on risk assessment scales in the target population
- Unique approach to smoking in Aboriginal and Torres Strait Islander peoples of childbearing age
- Draws on both well-established and new measures
- Potential limitations relate to information and selection biases.

### INTRODUCTION

Australia claims one of the lowest rates of tobacco smoking in OECD countries of 15.1%.<sup>[1]</sup> However several subgroups of the population maintain high rates of smoking.<sup>[2]</sup> Tobacco smoking is the main preventable risk factor contributing to the burden of disease in Aboriginal and Torres Strait Islander peoples.<sup>[3]</sup> Whilst there has been a significant drop in Indigenous smoking prevalence over the last 10 years overall, smoking rates are 2.6 times that of the general population at 41%, with higher rates of 50% or more in remote areas.<sup>[4-5]</sup> However prevalence of Indigenous smoking in the age group 25-34 years has not decreased significantly for either gender,<sup>[4]</sup> and rates in pregnant Aboriginal

1  
2  
3  
4  
5  
6 and Torres Strait Islander women are quadruple (49.3%) those of pregnant  
7 women in the general population (12.1%).[6]  
8  
9

10  
11 While it is acknowledged that Indigenous populations across and even within  
12 different continents belong to very diverse communities with their own cultures  
13 and norms, some broad factors impact on Indigenous peoples in colonised  
14 Western nations. American Indians, Alaskan Natives, New Zealand Māori and  
15 Inuit all have a higher prevalence of smoking than the mainstream  
16 populations,[7] particularly in their reproductive years, resulting in significant  
17 health disparities.[8] Smoking is comparably affected by the social determinants  
18 of health, and cultural factors, including for some First Nation peoples  
19 ceremonial and spiritual uses of tobacco.[9] Aboriginal and Torres Strait Islander  
20 peoples have a long history of tobacco use.[107] It is believed that the effects of  
21 colonisation,[107] the stolen generation,[118] and racism,[129] have all  
22 contributed to the contemporary use of tobacco, to the detriment of the health  
23 and longevity of Aboriginal and Torres Strait Islander peoples, and their future  
24 generations. Factors promoting smoking and smoking initiation in Aboriginal  
25 and Torres Strait Islander peoples include community and family norms of  
26 smoking,[130] smoking to promote social inclusiveness and cohesion,[144] peer  
27 group belonging,[152] and daily stressors.[130] [1][2][3]

28  
29  
30  
31  
32  
33  
34  
35  
36  
37  
38  
39  
40  
41 Several studies have explored the knowledge levels of Aboriginal and Torres  
42 Strait Islander peoples about tobacco smoking.[16-184] with moreThere is  
43 limited knowledge-exploration about Indigenous attitudes and beliefs about the  
44 risks of smoking. There has been some exploration about what anti-smoking  
45 messages are effective and acceptable for Aboriginal and Torres Strait Islander  
46  
47  
48  
49  
50  
51  
52  
53  
54  
55  
56  
57  
58  
59  
60



1  
2  
3  
4  
5  
6 populations,[193] as media messages or as adjuncts to clinical treatment.[2044]  
7  
8 Mainstream antismoking campaigns have shown to be effective in terms of recall  
9  
10 and perceived effectiveness by Indigenous peoples in Australia,[21-225-6] the  
11  
12 U.S. [237] and NZ,[248] but have not necessarily translated into increased quit  
13  
14 rates in these populations.[259] Aboriginal and Torres Strait Islander smokers in  
15  
16 a forced exposure to several television advertisement rated those containing  
17  
18 strong graphic imagery or personal narratives as effective for a range of  
19  
20 measures including being more likely to quit.[190] Indigenous peoples in the US,  
21  
22 Australia and New Zealand (NZ), have a preference for culturally targeted  
23  
24 campaigns.[259] Aboriginal and Torres Strait Islander viewers aged 16-40 years  
25  
26 of the 'Break The Chain' campaign in Australia positively rated the targeted  
27  
28 advertisement, had good recall and 57% stated they intended to quit in the  
29  
30 following month.[2644] Where culturally targeted campaigns have been tested,  
31  
32 alongside generic campaigns, for example in NZ youth, they proved as effective at  
33  
34 supporting Maori to quit smoking as generic messages were for the general NZ  
35  
36 population.[2742]

37  
38  
39 However, attitudes of Indigenous maternal smokers, to prevailing health risk  
40  
41 messages about smoking, have been ~~particularly~~ under-researched ~~for~~  
42  
43 ~~Aboriginal and Torres Strait Islander maternal smokers and those of~~  
44  
45 ~~childbearing age. [13]~~ A systematic review used meta-ethnography to synthesise  
46  
47 the evidence onf the knowledge, attitudes and experiences of maternal smoking  
48  
49 by Aboriginal and Torres Strait Islander peoples,[1343] from seven studies.[14,  
50  
51 28-3320] The synthesis revealed a lack of salience of media messages and  
52  
53 potentially some resistance to advice.[130] Equally pregnant women have highly  
54  
55  
56  
57  
58  
59  
60

1  
2  
3  
4  
5  
6 protective attitudes towards babies and children.<sup>[1310]</sup> A recent study of  
7  
8 attitudes of maternal Aboriginal smokers and their family members suggested  
9  
10 that attitudes about the health risks of smoking may be influenced by messages  
11  
12 not matching the women's lived experiences, coupled with inadequate access to  
13  
14 information.<sup>[3415]</sup> Limited knowledge about the specific hazards of smoking  
15  
16 and cessation,<sup>[3516]</sup> and the lack of salience of anti-smoking messages are  
17  
18 barriers to effective cessation.<sup>[130]</sup> However, a program using a culturally  
19  
20 targeted smoking cessation video with pregnant Alaska Native smokers was no  
21  
22 more efficacious than in the control group.<sup>[3621]</sup> Issues less well understood are  
23  
24 how Indigenous adults broadly assess their risks in relation to tobacco smoking  
25  
26 (not just their knowledge of adverse health effects) and how these assessments  
27  
28 are related to their intentions to quit smoking. If attitudes to risk taking  
29  
30 behaviour for smoking and responses to anti-tobacco messages are not  
31  
32 understood it is difficult to formulate effective messages and interventions.  
33  
34 There are no best practice guidelines to develop and personalise such messages  
35  
36 for Aboriginal and Torres Strait Islander peoples.<sup>[184, 3717-3818]</sup>  
37  
38  
39 Our study therefore aims to determine how Aboriginal and Torres Strait Islander  
40  
41 smokers of childbearing age assess risks about tobacco smoking and how these  
42  
43 assessments are associated with their intentions to quit smoking or seeking help  
44  
45 to quit. We further aim to determine which demographic and behavioural factors  
46  
47 (such as age, gender, nicotine dependence level, household smoking rules) are  
48  
49 predictors of intentions to quit and seek help for quitting. Two risk assessment  
50  
51 scales for smoking will be examined for their cultural acceptability, validity and  
52  
53 reliability, and their utility as a pragmatic heuristic.  
54  
55  
56  
57  
58  
59  
60

## Underpinning Theories

Research shows that interventions based on the assessment of risk behaviour can positively influence the risk taking behaviour that contributes to a range of preventable diseases.<sup>[39,49]</sup>

Witte et al proposed a theory called the Extended Parallel Process Model (EPPM) to explain message processing and subsequent behavioural intentions.<sup>[20]</sup> (Key constructs shown in Table 1.)

Table 1: Key constructs, definitions and measures (adapted from Witte et al.[40])

| Definitions of constructs                                                                                                 | How measured on RBD scale or other |
|---------------------------------------------------------------------------------------------------------------------------|------------------------------------|
| <i>Perceived threat</i> : awareness of a specific harm in the environment, consisting of:                                 | Total of perceived threat scores   |
| <i>Susceptibility to threat</i> : belief about one's risk of experiencing the threat                                      | Sub-total of susceptibility scores |
| <i>Severity of threat</i> : belief about the magnitude of the threat                                                      | Sub-total of severity scores       |
| <i>Perceived efficacy</i> : thoughts about ease, feasibility and the effectiveness of averting the threat, consisting of: | Total of perceived efficacy scores |
| <i>Self-efficacy</i> : belief in one's ability to perform recommended response                                            | Sub-total of self-efficacy scores  |

|                                                                            |                                                                                                                                                                                                                                                                                             |                                                                                                                  |
|----------------------------------------------------------------------------|---------------------------------------------------------------------------------------------------------------------------------------------------------------------------------------------------------------------------------------------------------------------------------------------|------------------------------------------------------------------------------------------------------------------|
| 1<br>2<br>3<br>4<br>5<br>6<br>7<br>8<br>9<br>10                            | <i>Response efficacy</i> : belief about effectiveness of recommended response to avert the threat                                                                                                                                                                                           | Sub-total of response efficacy scores                                                                            |
| 11<br>12<br>13<br>14<br>15<br>16<br>17<br>18<br>19<br>20<br>21<br>22<br>23 | <i>Danger control dominance</i> : the dominant response in the person faced with a threat, who considers themselves able to perform the recommended response, believes the response to be effective, therefore tries to reduce the danger by taking positive action (protective motivation) | High efficacy score and high threat score                                                                        |
| 24<br>25<br>26<br>27<br>28<br>29<br>30<br>31                               | <i>Danger control responses (protective motivation)</i> : beliefs, attitudes, intentions, and behaviour changes in accordance with the message recommendations                                                                                                                              | Score from intentions to quit/seek help scales (Wong and Cappella) and responses to MTSS questions               |
| 32<br>33<br>34<br>35<br>36<br>37<br>38<br>39<br>40<br>41<br>42<br>43<br>44 | <i>Fear control dominance</i> : the dominant emotional response in the person when faced with a threat, who feels unable to perform the recommended response, and/or believes the response to be ineffectual, and tries to psychologically reduce their fear by defensive motivation        | Low efficacy score with high threat score                                                                        |
| 45<br>46<br>47<br>48<br>49                                                 | <i>Fear control responses (defensive motivation)</i> : coping responses that diminish fear                                                                                                                                                                                                  | Score from questions about defensive avoidance, denial, reactance, message derogation and perceived manipulation |
| 50<br>51<br>52<br>53<br>54                                                 | <i>Critical point</i> : when perceptions of threat begin to outweigh perceptions of efficacy,                                                                                                                                                                                               | The exact critical point can vary with topics and populations                                                    |

|                                                                                                                                                  |                                                                                                                                                                                                                                |
|--------------------------------------------------------------------------------------------------------------------------------------------------|--------------------------------------------------------------------------------------------------------------------------------------------------------------------------------------------------------------------------------|
| causing shift from danger control to fear control processes                                                                                      |                                                                                                                                                                                                                                |
| <i>Discriminating value</i> : a numerical value used to discriminate between people in danger vs. fear control                                   | Formula: $(\Sigma \textit{perceived efficacy}) - (\Sigma \textit{perceived threat}) = \textit{discriminating value}$<br>A positive score indicates danger control processes; a negative score indicates fear control processes |
| <i>Protective responses</i> : similar to danger control responses, but beliefs/attitudes are centred around protecting others from tobacco smoke | Score from 5 new measures to attitudes about smoking exposure for Aboriginal or Torres Strait Islanders, babies and children                                                                                                   |

Legend: RBD – risk behaviour diagnosis; MTSS – motivation to stop smoking;  $\Sigma$  – sum of.

According to the EPPM, “when people perceive a serious and relevant threat, they become scared”, [4020] (p 318) and will take an action to reduce their fear by one of two general pathways. People can either control the danger elicited by the threat by making a positive and conscious shift in attitude and behaviour (called protective motivation or danger control responses). Alternately they may feel fearful and try and control the fear unconsciously by denial, discounting or reactance against the threat (called defensive motivation or fear control responses). If people feel no threat at all (perhaps due to a lack of knowledge) there may be a low response to the message. Furthermore Witte et al has shown

1  
2  
3  
4  
5  
6 that that the level of perceived efficacy determines whether people engage in  
7  
8 danger control or fear control responses.[4020]  
9

10 Witte devised and validated a scale called the Risk Behaviour Diagnosis (RBD)  
11  
12 scale to measure these responses across four dimensions of perceived threat  
13  
14 (perceived susceptibility and severity of threat) and perceived efficacy (response  
15  
16 efficacy and self-efficacy).[4020] High threat responses coupled with high  
17  
18 efficacy tend to lead to danger control responses, in this case to adopt message  
19  
20 recommendations, change attitudes, intentions and smoking behaviour. In  
21  
22 contrast, if people feel they can-not adopt the recommended response to avert  
23  
24 the treat, because of a lack of efficacy (it's too hard, too little support, or it is  
25  
26 perceived as futile to do so), they typically try to control the fear by avoiding the  
27  
28 issue, discount the message, or may consider the issue is exaggerated.  
29  
30

31  
32 If fear control processes are initiated, it can be difficult to shift attitudes and  
33  
34 there is a need for carefully constructed messages to “break through defence  
35  
36 mechanisms”.[4124] Therefore according to this theory people who are in fear  
37  
38 control will need assistance to build up efficacy rather than make them more  
39  
40 fearful. Bandura’s work on self-efficacy confirms this and he considers self-  
41  
42 efficacy is central to any healthy behaviour change.[4222]  
43  
44

45 The EPPM model is a predominant message design theory,[4323] and has been  
46  
47 widely applied to a range of health behaviours internationally and a wide range  
48  
49 of health promotional campaigns, and is the basis of tobacco counter-  
50  
51 marketing.[3749] A study by Wong and Cappella has used the RBD to measure  
52  
53 responses to video-based anti-tobacco television advertisements.[4424]  
54  
55

1  
2  
3  
4  
5  
6 Assessment scales for risk behaviour, including the RBD, have been used in  
7  
8 several minority groups and across cultures.[4525-5333] However risk  
9  
10 assessment scales for tobacco and the EPPM have not been used or validated for  
11  
12 Australian Aboriginal or Torres Strait Islander or other Indigenous populations.  
13

14  
15 Another theory informing this study is PRIME theory (P-plans; R-responses; I-  
16  
17 impulses; M-motives; E-evaluations), which proposes that smokers' motivations  
18  
19 are fluid, and can change unexpectedly.[5434] The central tenets of PRIME  
20  
21 theory include people's wants and needs in the moment, and their self-  
22  
23 identity.[5434] West suggests that a person can be stimulated to make a quit  
24  
25 attempt, even if they have not been thinking about quitting, especially if the  
26  
27 intervention is repeated and evidence-based therapy offered.[5535] A new  
28  
29 measure based on PRIME theory, called the Risk Acceptance Ladder  
30  
31 (RAL),[5636] (Cattaruzza & West, 2014, in preparation) proposes that the blocks  
32  
33 to effective behaviour change can be ascertained by determining the individual  
34  
35 level of risk acceptance and at what stage motivation has stalled. For this study  
36  
37 the RAL is modified into the Smoking Risk Assessment Target (SRAT) (see  
38  
39 methods). If this measure correlates well with message processing it may be also  
40  
41 useful to assess Aboriginal and Torres Strait Islander smokers.  
42  
43  
44

45  
46  
47 **Rationale for assessing validity and reliability of the scales for Aboriginal**  
48  
49 **and Torres Strait Islander smokers**

50  
51  
52 Assessment scales, developed for Western populations, are important to validate  
53  
54 before use in a cross-cultural context.[57] Theoretical concepts developed in the  
55  
56

context of the dominant Western psychology and communication fields may not transfer into a cross-cultural or Indigenous setting.[57-58] Preliminary phases of community engagement are an important part of the process of validation, and will be described below.[58] Results from the validation and reliability process also need careful interpretation with culturally competent advisors.[58]

## METHODS AND ANALYSIS

### Study Overview

This is a cross-sectional study to investigate the validity and reliability of risk assessment scales, and predictors of intentions to quit smoking, for Australian Aboriginal and Torres Strait Islander smokers of both genders, aged 18-45 years old. The study will be conducted through face-to-face interviews in a regional centre in NSW Australia.

### Research Questions

1. Are RBD/SRAT and associated measures of tobacco behaviour reliable and valid in Australian Aboriginal and Torres Strait Islander smokers?
2. What are the main predictors of intentions to quit smoking and intentions to seek help for quitting in Aboriginal and Torres Strait Islander smokers?
3. What variables confound the associated factors and intentions to quit and [to seek help](#) in Aboriginal and Torres Strait Islander smokers?
4. What smoking related attitudes (e.g., danger/fear control responses) are associated with positive/negative discriminating values on the RBD?



1  
2  
3  
4  
5  
6 5. What are the associations between the RBD and SRAT?  
7  
8  
9

## 10 11 **Study Population**

### 12 Participant recruitment and setting

13  
14  
15 The study site is a regional centre in NSW. Recruitment into the study will be by  
16 personal intercept, primarily at regional community and social events, and in  
17 other settings likely to yield interest, including a local Aboriginal Community  
18 Controlled Health Service (ACCHS). The survey will be administered by face-to-  
19 face interview, using where possible a tablet computer, connected by cellular  
20 network to a secure on-line survey site. Where connectivity is unreliable a paper  
21 survey will be used and data submitted on-line later. The interviewers will be  
22 either the first author (non-Indigenous female) or Indigenous research  
23 assistants, or ACCHS staff.  
24  
25  
26  
27  
28  
29  
30  
31  
32  
33  
34  
35  
36  
37

38 ~~Inclusion criteria are~~ Aboriginal and/or Torres Strait Islander people, aged 18-  
39 45 years old who currently smoke. ~~Participants will be included in the study, if~~  
40 ~~they self-report as Indigenous and are in the age bracket. Although we would~~  
41 ~~have preferred to include participants under 18yrs, the ethics committee did not~~  
42 ~~support this.~~ Participants will be offered a \$10 shopping voucher for their time.  
43  
44  
45  
46  
47  
48  
49  
50  
51

52 Sample size calculation  
53  
54  
55  
56  
57  
58  
59  
60

1  
2  
3  
4  
5  
6 The estimated sample size is 120 participants. Sample size estimations are based  
7  
8 on the procedure described by Altman.<sup>[5937]</sup> Standardised differences for  
9  
10 intention to quit smoking and intention to seek help to quit smoking are  
11  
12 calculated using means (M) and standard deviations (SD) published by Wong  
13  
14 and Capella (intent to quit M 2.48, SD 0.78; intent to seek help M 1.85, SD  
15  
16 0.77).<sup>[4424]</sup> These figures are taken from a different population because there  
17  
18 have been no relevant studies in Indigenous peoples. A total sample size of 110  
19  
20 is required to detect a significant difference between people in 'danger control'  
21  
22 versus people in 'fear control' (according to the RDB scale) and intentions to quit  
23  
24 smoking, at  $\alpha < .05$ , and 90% power. An additional sample size calculation  
25  
26 was performed to determine the required sample size to detect prevalence of  
27  
28 knowledge, attitudes and behavior within the target population. The required  
29  
30 sample size is 100, based on 50% prevalence, 10% precision and 95%  
31  
32 confidence intervals. However for the multivariate analysis 120 participants  
33  
34 are required (assuming to adequately estimate the effect of 6 key variables (20  
35  
36 per variable).<sup>[60]</sup>

#### 41 42 Sampling Stratification

43  
44  
45 Random sampling will not be feasible. To ensure that the convenience sample is  
46  
47 as representative of the target group as possible, the sample will be stratified by  
48  
49 age group and gender. Data from the 2011 Australian Census determines the  
50  
51 population parameters for persons identified as Aboriginal and/or Torres Strait  
52  
53 Islander, by age group and gender in the regional city. The proportion of smokers  
54  
55  
56  
57  
58  
59  
60

within each age group and gender are estimated using smoking prevalence data from the 2008 National Aboriginal and Torres Strait Islander Social Survey

(Table 2).<sup>[6138]</sup>

**Table 2: Stratified sampling strategy of target Aboriginal and Torres Strait Islander populations**

| Target populations numbers (2011 Census from regional city LGA) |                  | Smoking Prevalence (2008 NATSISS) |           | % of target populations in regional city who smoke |                               | Sample stratified by gender & age group |                  |                    |
|-----------------------------------------------------------------|------------------|-----------------------------------|-----------|----------------------------------------------------|-------------------------------|-----------------------------------------|------------------|--------------------|
| Age range (yrs)                                                 | Male<br><i>N</i> | Female<br><i>N</i>                | Male<br>% | Female<br>%                                        | Male<br><i>N</i> (% of total) | Female<br><i>N</i> (% of total)         | Male<br><i>N</i> | Female<br><i>N</i> |
|                                                                 |                  |                                   |           |                                                    | 67                            | 71                                      |                  |                    |
| 18-24                                                           | 172              | 178                               | 38.7      | 39.7                                               | (13.9%)                       | (14.7%)                                 | 17               | 18                 |
|                                                                 |                  |                                   |           |                                                    | 80                            | 92                                      |                  |                    |
| 25-34                                                           | 142              | 184                               | 56        | 50.1                                               | (16.6%)                       | (19%)                                   | 20               | 23                 |
|                                                                 |                  |                                   |           |                                                    | 85                            | 88                                      |                  |                    |
| 35-44                                                           | 154              | 187                               | 55.5      | 47.3                                               | (17.6%)                       | (18.2%)                                 | 21               | 22                 |
| <b>Total</b>                                                    | <b>468</b>       | <b>549</b>                        |           |                                                    | <b>232</b>                    | <b>251</b>                              | <b>58</b>        | <b>63</b>          |

---

(48.1%) (51.9%)

---

As can be seen from Table 2, the final sample will be 58 males and 63 female smokers (N= 121). This represents 25% of the Aboriginal and Torres Strait Islander smokers aged 18-45yrs in the regional city (121/483).

## MEASURES/DATA COLLECTION

### The survey

The survey will collect quantitative data, requiring categorical responses or responses on Likert scales where appropriate, on participants' smoking behaviours, initiation of smoking, attitudes to smoking and cessation, attitudes to health risks of smoking, experiences with quit attempts and smoking cessation, and future intentions to quit smoking or seek help for quitting. Views The questionnaire will also ~~will be~~ elicit responses ~~ed~~ about smoking in pregnancy and the protection of babies and children from tobacco smoke. The participants questions ~~will be explore~~ asked to rate the level of support available from family and peers for quitting and professional support. Three open-ended questions are used in the survey: 1) to initially explore general attitudes to smoking; 2) to ascertain if there is any more the participant would like to say about smoking or quitting at the end of the interview; and 3) to elicit more detail from those who indicate that they do not want to quit smoking. The survey will use open-ended questions to explore general attitudes to smoking, and The survey guide includes 'notes sections' on most of the pages, so that the

1  
2  
3  
4  
5  
6 interviewer ~~can~~will record relevant comments or narratives expressed by the  
7 participant in the course of the interview. The survey was pilot tested with an  
8 Aboriginal Health Worker (AHW), and based on this it is anticipated that it will  
9 take approximately 20 minutes for participants to complete.  
10  
11  
12  
13  
14  
15  
16

17 The questionnaire includes several instruments:  
18  
19

#### 20 Tobacco Dependence Scales 21 22

23  
24  
25 Heaviness of Smoking Index (HSI) is an accepted method of assessing nicotine  
26 dependence levels, calculated from the time to first cigarette and number of  
27 cigarettes smoked per day. Its reliability has been shown to be better than the  
28  
29 longer Fagerstrom Test for Nicotine Dependence (FTND).<sup>[6239]</sup>  
30  
31  
32

33  
34  
35 Strength of Urges to Smoke (SUTS) is another measure of dependence found to  
36  
37 be more reliable for predicting cessation than the HSI.<sup>[6239]</sup> It is a routine part  
38 of the “Smoking in England” survey, administered to over 10,000 smokers per  
39  
40 annum.<sup>[6340]</sup> It is a newer scale for nicotine dependence and is included here,  
41  
42 as it has not yet been used with Australian Aboriginal and Torres Strait Islander  
43  
44 smokers or other Indigenous populations.  
45  
46  
47  
48

#### 49 Intentions to quit 50 51 52 53 54 55 56 57 58 59 60

1  
2  
3  
4  
5  
6 The Motivation To Stop Scale (MTSS) uses dichotomous measures (yes/no) for  
7 intentions to quit (want to quit, 'should quit', intends to quit) and has shown  
8 good level of prediction for quitting.[6441] Intentions to quit and intentions to  
9 seek help (Likert scale) are also adapted from Wong & Cappella.[4424]  
10  
11  
12  
13

#### 14 Risk assessment scales

15  
16  
17  
18  
19  
20 The Risk Behaviour Diagnosis Scale consists of a series of questions (Likert  
21 scales) on four aspects: severity of threat, susceptibility to threat, response  
22 efficacy and self-efficacy.[4020]  
23  
24  
25  
26

27  
28 As a measure of fear control responses participants will be asked to respond to  
29 four questions about reactance, avoidance and message derogation on a Likert  
30 scale.[4020] Similarly for danger control responses an aggregate score of the five  
31 questions on intentions to change smoking behaviour/seek help will be  
32 calculated.[4424] Because of the evidence pointing to strong protective attitudes  
33 in the target population, five questions on a Likert scale will be asked to  
34 determine protective responses about smoking in pregnancy, around children,  
35 and for Aboriginal and Torres Strait Islander peoples in general. A protection  
36 score will be calculated from these responses.  
37  
38  
39  
40  
41  
42  
43  
44  
45

46  
47  
48 The Risk Acceptance Ladder is a new measure currently being used in Italy to  
49 research a population with high rates of smoking (Cattaruzza & West, 2014, in  
50 preparation). The measure has been adapted to the Aboriginal and Torres Strait  
51 Islander population, as below.  
52  
53  
54  
55

### Consultative process, face validity and questionnaire adaption

In the formative phase of the research, before ethics approvals were finalised, several community consultation processes were conducted. The aim was to ~~at~~ test the content and face validity, suitability, readability, cultural appropriateness, acceptability and feasibility of the survey instrument. Consultation was through a focus group with Aboriginal and/or Torres Strait Islander people in the target age group, and an Aboriginal elder, recruited from ~~an local~~ Aboriginal Studies class at a local tertiary college and two Aboriginal Indigenous student liaison staff from the University campus (N=7). Several consultative interviews were also held with a senior ~~Aboriginal Health Worker~~ (AHW) specialising in tobacco. Expert input was obtained for the scales from their respective inventors, to informally assess if they maintained integrity once adapted, rather than assess their cultural suitability for this population (Witte, and Cattaruzza and West).

The RBD scales were adapted to tobacco-related risks from the templates in Witte's manual (see Appendix 1).[41] The community consultation group and AHW requested changes to several questions and suggested additional questions about reason for smoking initiation. Minor rewording was suggested for sSome of the RBD core statements ~~were reworded~~ to make them more comprehensible to this population easier to understand. Additionally several sensitive questions about socioeconomic status and pregnancy were reworded.

1  
2  
3  
4  
5  
6 The RAL was adapted for the Aboriginal and Torres Strait Islander populations,  
7  
8 and was renamed the SRAT as follows:  
9

10 (a) It was deemed more culturally appropriate to depict the measure as a target  
11  
12 with concentric circles (progressing from the outside to the centre) instead of a  
13  
14 ladder, for the Aboriginal and Torres Strait Islander population.  
15

16 (b) The potential responses of the SRAT were reworded to become more  
17  
18 appropriate for the target population, and two additional responses included  
19  
20 [\(see Appendix 1\)](#).  
21  
22

23 Changes were approved by the HRECs.  
24  
25  
26  
27  
28

## 29 ANALYSIS

30  
31  
32 Table 3 outlines variables that will be measured.  
33  
34

35 Table 3: Variables from questionnaire  
36  
37  
38  
39  
40  
41  
42  
43  
44  
45  
46  
47  
48  
49  
50  
51  
52  
53  
54  
55  
56  
57  
58  
59  
60



### Demographics

- Age
- Gender (Male/Female)
- Aboriginal and Torres Strait Islander status (Aboriginal/Torres Strait Islander/both)
- SES (calculated from postcode, suburb, income source, health care card use, education) – for details contact authors
- Environmental variables
  - a. Number of smokers in household (1/2-3/>3)
  - b. Pregnant women in the house (Y/N)
  - c. Children in the house (Y/N)
  - d. Complete, partial or no bans for household smoking
  - e. Smoke free behaviours of participants (house and car)

### Smoking behaviour variables

- Nicotine dependence scores (Heaviness of Smoking Index and SUTS)
- Age of smoking initiation and uptake
- Factors influencing smoking initiation (11 response options)
- Patterns of smoking (frequency and type)
- Smoking by others in social circle (Y/N)
- Current/previous quit attempts (Y/N)
- Current/previous use of cessation therapies (Y/N)
- Level of support for quitting (social and professional) (sliding scales 0-10)

### Smoking risk related attitudes

- RBD scale resulting a composite score (discriminating value, recoded positive or negative)
- Threat score (three items for susceptibility plus three for severity of threat on Likert scales of 1-5)
- Efficacy score (three items for response efficacy plus three for self-efficacy on Likert scales of 1-5)
- RBD results recoded into four quadrants of high efficacy/high threat; high efficacy/low threat; low efficacy/high threat; low efficacy/low threat;
- Fear control responses score (calculated from questions on avoidance, denial, and refuting messages, Likert scales 1-5)
- Danger control responses score (calculated from questions on intentions to quit or seek help, Likert scales 1-5)
- Protective responses score (calculated from questions on attitudes about protecting babies/children, Likert scales 1-5)
- General attitudes about smoking and quitting (13 response options)
- SRAT (choice of 1 option from 12, will be reduced to 4 categories)

### Behavioural intentions

- Intentions to quit (MTSS) (want/do not want) - if affirmative then how soon intends to quit (3month/1 month/hope to soon/don't know)
- Intentions to quit or reduce smoking (Wong & Capella) (Likert scales 1-4)
- Intentions to seek help with quitting (Wong & Capella) (Likert scales 1-4)

Legend: Y – yes; N – no; SUTS – strength of urges to smoke; RBD – risk behaviour

1  
2  
3  
4  
5  
6 diagnosis; SRAT – smoking risk assessment target; MTSS – motivation to stop  
7  
8 smoking scale  
9

### 10 11 12 13 14 **Statistical analyses** 15

16  
17 On study completion, the data entered through the survey software will be used  
18  
19 to generate a summary report and exported directly to SPSS v 20 for analysis.  
20

21 Descriptive analyses will summarise the data for all variables.  
22

23  
24 To measure the reliability and validity of the scales the following will be used.  
25

- 26  
27 1. Content validity and face validity is qualitatively assessed through the  
28  
29 community panel and expert consultation for RBD and SRAT  
30
- 31 2. The patterns of correlation will be explored between the RBD subscale  
32  
33 scores (susceptibility and severity of threat, and response and self-  
34  
35 efficacy) and also for danger control responses, fear control responses  
36  
37 and protective responses  
38
- 39 3. Internal consistency of sub-scales will be assessed with Cronbach's  $\alpha$ .  
40  
41

42  
43 Multivariate analyses will seek the most likely demographic predictors of  
44  
45 intentions to quit smoking/seek help for quitting, e.g. age, gender, dependence  
46  
47 levels, household smoking rules. Psychological factors such as threat and efficacy  
48  
49 scores, danger and fear control responses will be analysed to assess whether  
50  
51 they further influence the outcome measures.  
52  
53  
54  
55  
56  
57  
58  
59  
60

1  
2  
3  
4  
5  
6 RBD scores and the SRAT will be examined to see if participant responses are  
7  
8 correlated.

9  
10  
11 Qualitative and open-ended responses will undergo a general inductive thematic  
12 analyses, [65] by two researchers independently. A cut and paste technique will  
13 be used for initial coding using Excel spread sheets, and consensus reached by  
14 discussion. The themes and will be used to enrich the quantitative findings.  
15  
16  
17  
18  
19

## 20 21 22 23 **ETHICS AND DISSEMINATION**

24  
25  
26 The study is low risk in terms of ethics, however, discussing smoking may be  
27 considered a sensitive issue for Aboriginal and Torres Strait Islander  
28 participants, and researchers collecting the data will be suitably briefed. The  
29  
30 research will adhere to Australia's National Health and Medical Research  
31  
32 Council's Values and Ethics in Aboriginal and Torres Strait Islander Health  
33  
34 Research 2003 guidelines, i.e. reciprocity, respect, equality, responsibility,  
35  
36 survival and protection, spirit and integrity. [6642] Examples of reciprocity  
37 include the first author sharing her knowledge and skill base (as a GP and  
38 Tobacco Treatment Specialist) about tobacco control and research with the  
39 participating organisations and their staff members. The participants also would  
40 be offered brief advice on smoking cessation if they wished after the interview,  
41 and extra resources such as a culturally adapted DVD. The primary HREC is the  
42  
43 Aboriginal Health & Medical Research Council Ethics Committee (AH&MRC),  
44  
45 which approved the study with support from the partnering ACCHS (approval  
46  
47  
48  
49  
50  
51  
52  
53  
54  
55  
56  
57  
58  
59  
60

1  
2  
3  
4  
5  
6 number 928). Additional HRECs ratified the primary approval (James Cook  
7  
8 University (H4467) and Southern Cross University (ECN-13-242).  
9

10  
11  
12 Participants will be approached at community events that are targeted to the  
13  
14 local Australian Aboriginal and Torres Strait Islander communities. Potential  
15  
16 recruits will be asked if they fulfil the selection criteria and canvassed about  
17  
18 their willingness to join in the study. All participants will be provided with a  
19  
20 participant information sheet advising of the purpose of the study and  
21  
22 implications regarding:  
23

- 24 • Objectives of the research
- 25
- 26 • Why the information is being collected and how it will be used, accessed  
27  
28 and stored
- 29
- 30 • Voluntary nature of the study, provision for withdrawal of consent,  
31  
32 assurance of confidentiality and anonymity  
33  
34  
35

36  
37 After the information sheet is explained, the participant will be asked to provide  
38  
39 informed consent by having their name typed on the touch screen of the tablet  
40  
41 computer and ticking the 'agree' box. All data will be de-identified and data and  
42  
43 materials will be stored for seven years, in a secure location, and where digitally  
44  
45 stored will be password-protected and only accessed by the researchers.  
46  
47

48  
49 This study is one of several studies contributing to a PhD Public Health thesis for  
50  
51 the first author. Journal articles and presentations at relevant national and  
52  
53 international conferences to academics, researchers and stakeholders will  
54  
55 disseminate these findings. The outcomes of the study will also inform policy and  
56  
57

1  
2  
3  
4  
5  
6 practice recommendations. A community report will be sent to the partnering  
7  
8 ACCHS for dissemination to clients at the service and to the communities who  
9  
10 have been involved. Community-based forums will be held as appropriate.  
11  
12  
13

## 14 15 16 **DISCUSSION**

17  
18 This study aims to determine how Australian Aboriginal and Torres Strait  
19  
20 Islander smokers of childbearing age assess risks about tobacco smoking and  
21  
22 how these assessments are associated with their intentions to quit smoking. We  
23  
24 aim to validate two risk assessment scales for Aboriginal and Torres Strait  
25  
26 Islander smokers, which could have the potential for research transference to a  
27  
28 clinical or public health setting.  
29  
30

31  
32 The RBD scale was originally designed as a clinical tool to be used in the context  
33  
34 of delivering tailored health messages at a clinic for sexually transmitted  
35  
36 diseases and HIV testing.<sup>[40-29]</sup> Advice was then adapted to individuals  
37  
38 according to their responses.  
39  
40

41  
42 Primary health care practitioners and clinicians are often faced with the task of  
43  
44 assisting Aboriginal and Torres Strait Islander smokers to quit smoking. Anti-  
45  
46 tobacco messages do not just lie in the domain of social marketing; they also  
47  
48 need to be carefully pitched to maximise receptivity and support behaviour  
49  
50 change within the clinical consultation. Little is known about the effectiveness of  
51  
52 smoking behaviour change models for Aboriginal and Torres Strait Islander  
53  
54 peoples. The trans-theoretical model (stages of change or SOC) has been widely  
55  
56  
57  
58  
59  
60

1  
2  
3  
4  
5  
6 used in Australia for Aboriginal and Torres Strait Islander smokers, but  
7  
8 outcomes have never been evaluated.[6743] Aboriginal smokers in remote areas  
9  
10 have been described as more likely to be in the pre-contemplative or  
11  
12 contemplative stages of change and require more assistance to be ready to quit  
13  
14 smoking.[6844] Also it is known that ~~interventions-motivational interviewing,~~  
15  
16 ~~including that~~ based on the SOC, ~~isare~~ not ~~as~~ effective in pregnancy ~~as in the~~  
17  
18 ~~general population,[6925] and holds no special advantages over other types of~~  
19  
20 ~~psychosocial counselling.[7045]~~  
21  
22

23 If the measures under examination here are found to be reliable for the target  
24  
25 audience of Aboriginal and Torres Strait Islander smokers of childbearing age,  
26  
27 then accurate assessments could be made. A new model based on assessment of  
28  
29 risk behaviour could have the potential to assess fear versus danger control  
30  
31 responses and facilitate the pitching of tailored anti-tobacco messages for the  
32  
33 individual, build motivational tension for quitting, and yet avoid engendering  
34  
35 fear control responses or resistance.  
36  
37

38 If people are engaged in fear control processes, messages developed should focus  
39  
40 on the efficacy of the recommended response to counteract the high levels of  
41  
42 perceived threat. Focusing on threat messages alone may cause the messages to  
43  
44 backfire. It is important to emphasise that the recommended responses are  
45  
46 feasible and effective to avert the threat from smoking. It is essential to help  
47  
48 people develop a belief in their ability to quit smoking, develop supportive  
49  
50 environments for quitting, and provide easy access to treatment.  
51  
52  
53  
54  
55  
56  
57  
58  
59  
60

1  
2  
3  
4  
5  
6 Central to building self-efficacy are strategies recommended by Bandura.<sup>[4222]</sup>

7  
8 He suggests several approaches: building skills, self-control and mastery for  
9  
10 quitting; learning about the experiences of others who have successfully quit;  
11  
12 verbal persuasion and motivation; helping people adopt a positive mindset; and  
13  
14 importantly having access to effective therapies.<sup>[4222]</sup>

15  
16  
17 Alternatively, if the target audience is in danger control, messages can remind  
18  
19 people about the threat of smoking to maintain motivation, whilst also  
20  
21 increasing efficacy for quitting, as above.  
22

23  
24 People with low threat perceptions may be neither in danger or fear control.  
25  
26 They may need to be convinced about the seriousness of or their susceptibility to  
27  
28 the threat. This group requires messages aimed at improving knowledge and  
29  
30 correcting any misconceptions. This may be best achieved by having messages  
31  
32 come from someone who is very similar to the client (possibly through use of  
33  
34 tailored videos or personalised narratives).  
35

36  
37 The SRAT may prove a simplified way to approach risk assessment in this target  
38  
39 group, as it demands a single response to a question. The measures require  
40  
41 validation for Aboriginal and Torres Strait Islander smokers in this child-rearing  
42  
43 age bracket, prior to a more formal assessment of feasibility and effectiveness in  
44  
45 a clinical setting.  
46

47  
48 Previous research has demonstrated the strong social and environmental  
49  
50 influences on smoking cessation, and the role health professionals play in  
51  
52 supporting smoking cessation in Aboriginal and Torres Strait Islander  
53  
54 communities.<sup>[71]</sup> The study will also assess predictors of intentions to quit that  
55  
56

1  
2  
3  
4  
5  
6 include measures of socio-economic position, smoking by friends, and household  
7 members, support offered by family and health professionals, and a range of  
8 other factors. These measures have the potential to determine social and health  
9 profession influences on intentions to quit smoking in this population. The  
10 analysis will determine if once these factors are controlled for whether the  
11 responses to the risk assessment measures have any additional impact.  
12  
13  
14  
15  
16  
17  
18  
19

### 20 21 22 **Limitations and Strengths** 23

24  
25 The study will be based on a sample from one regional area of NSW, fostering  
26 ownership of the project results for the local partnering ACCHS. Australian  
27 Aboriginal groups are diverse and this study will be conducted in just one region.  
28  
29 It is unknown how many Torres Strait Islanders reside in the area and how  
30 many will chose to participate in the study. As the validity and reliability  
31 measures to be used are context specific, they should be considered provisional,  
32 pending a larger study. These limitations impact on generalisability and  
33 transferability of the findings, although this is a pragmatic constraint for all  
34 research in diverse Indigenous groups. Selection bias may be operant if only  
35 those more willing to talk about their smoking agreeing to participate, another  
36 inevitable challenge for this kind of research. Recruiting some participants  
37 through a health service may favour those already with health problems, and  
38 who may already have motivation to quit smoking. There could be information  
39 biases: smoking status will be based on self-report and not any objective  
40 measures; recall bias may be operant with asking people to recollect their  
41  
42  
43  
44  
45  
46  
47  
48  
49  
50  
51  
52  
53  
54  
55  
56  
57  
58  
59  
60



1  
2  
3  
4  
5  
6 smoking history and perceived level of support for quitting; and social  
7 desirability bias with people reporting what they think the researcher wants to  
8 hear.  
9

10  
11  
12  
13 On the other hand, this is the first study as far as we know to validate risk  
14 assessment measures for tobacco smoking in a population of Aboriginal and  
15 Torres Strait Islander smokers. Health education and behaviour studies are  
16 tested for validity and reliability inconsistently,[7246] and very few scales are  
17 validated for the Aboriginal and Torres Strait Islander population.[7347] So the  
18 study is needed and an important one, although small and specific to one region.  
19  
20 The study takes a unique approach to smoking in Aboriginal and Torres Strait  
21 Islander peoples of childbearing age by drawing on both well-established and  
22 new measures from the health communication and addiction fields. If these  
23 measures prove to be valid and reliable they have a high potential for research  
24 translation into clinical settings. The outcomes could further inform the  
25 development and refining of social marketing policies and strategies for anti-  
26 tobacco messages through all media.  
27  
28  
29  
30  
31  
32  
33  
34  
35  
36  
37  
38  
39  
40  
41  
42

#### 43 **AUTHOR CONTRIBUTIONS**

44  
45  
46 GSG is responsible for the concept and design of the project, developing and  
47 adapting the survey instruments and digital format, testing the suitability of the  
48 survey for Indigenous participants, conducting surveys, training and supervising  
49 Indigenous research assistants to conduct surveys, collating and analysing and  
50 interpreting results, writing reports and manuscripts.  
51  
52  
53  
54  
55  
56  
57  
58  
59  
60

1  
2  
3  
4  
5  
6 KW contributed to the research design and statistical analysis and critical review  
7  
8 of manuscripts. AM advises on any aspect relating to tobacco smoking, smoking  
9  
10 risk behaviours and the survey, and critical review of manuscripts. YCJ as  
11  
12 Aboriginal academic advisor advises on the Indigenous community consultation  
13  
14 processes, recruitment and the cultural interpretation of results. ARC oversees  
15  
16 the study and advises on all aspects, and provides critical review of manuscripts.  
17  
18  
19  
20  
21

## 22 **FUNDING**

23  
24  
25 This study was funded by the following grants awarded to GSG as principal  
26  
27 researcher:  
28  
29

- 30 • National Health and Medical Research Council (Australia) and National Heart  
31 Foundation (Australia) post-graduate scholarship for Indigenous health  
32 research - APP1039759 and PP 11S 6181  
33  
34
- 35 • Royal Australian College of General Practitioners and Australian Primary  
36 Health Care Research Institute Indigenous Health Award 2013  
37  
38
- 39 • James Cook University, Faculty of Medicine, Health & Molecular Sciences,  
40 Graduate Research Scheme grant 2013  
41  
42

43  
44  
45 [ARC holds a National Health and Medical Research Council Career Development](#)  
46  
47 [Award \(APP1046773\)](#)  
48  
49  
50  
51  
52

## 53 **ACKNOWLEDGEMENTS**

54  
55  
56  
57  
58  
59  
60

1  
2  
3  
4  
5  
6 We acknowledge the valuable input of the Aboriginal community panel and the  
7  
8 support of the partnering ACCHS for this survey, and role of the Aboriginal  
9  
10 Health Worker in the study, without them the study would not be possible.  
11  
12  
13

## 14 15 16 REFERENCES

- 17  
18  
19 1. OECD. OECD Factbook 2013: Economic, Environmental and Social  
20  
21 Statistics: Smoking: OECD Publishing; 2013.  
22  
23 2. Baker A, Ivers RG, Bowman J, et al. Where there's smoke, there's fire: high  
24  
25 prevalence of smoking among some sub-populations and recommendations for  
26  
27 intervention. Drug Alcohol Rev 2006;25(1):85-96.  
28  
29 3. Vos T, Barker B, Stanley L, et al. The burden of disease and injury in  
30  
31 Aboriginal and Torres Strait Islander peoples 2003. Brisbane: The University of  
32  
33 Queensland; 2007.  
34  
35 4. Australian Bureau of Statistics. 4727.0.55.001 - Australian Aboriginal and  
36  
37 Torres Strait Islander Health Survey: First Results, Australia, 2012-13 Canberra:  
38  
39 Australian Bureau of Statistics; 27/11/2013 [cited 2013 28 November];  
40  
41 Available from:  
42  
43 [http://www.abs.gov.au/ausstats/abs@.nsf/Lookup/39E15DC7E770A144CA257](http://www.abs.gov.au/ausstats/abs@.nsf/Lookup/39E15DC7E770A144CA257C2F00145A66?opendocument)  
44  
45 [C2F00145A66?opendocument](http://www.abs.gov.au/ausstats/abs@.nsf/Lookup/39E15DC7E770A144CA257C2F00145A66?opendocument).  
46  
47 5. Robertson J, Conigrave K, Ivers R, et al. Addressing high rates of smoking  
48  
49 in remote Aboriginal communities: New evidence for GPs. Aust Fam Physician  
50  
51 2013;42(7):492-6.  
52  
53  
54  
55  
56  
57  
58  
59  
60

Formatted: Font: Not Italic

Formatted: Font: Not Italic

- 1  
2  
3  
4  
5  
6 6. Li Z, Zeki R, Hilder L, et al. Australia's mothers and babies 2010. In:  
7  
8 National Perinatal Epidemiology and Statistics Unit, editor. Sydney: Australian  
9  
10 Institute of Health and Welfare; 2011. Canberra: Australian Institute of Health  
11  
12 and Welfare (AIHW) National Perinatal Epidemiology and Statistics Unit; 2012.  
13
- 14 7. [DiGiacomo M, Davidson PM, Abbott PA, et al. Smoking cessation in](#)  
15  
16 [indigenous populations of Australia, New Zealand, Canada, and the United States:](#)  
17  
18 [Elements of effective interventions. Int J Environ Res Public Health](#)  
19  
20 [2011;8\(2\):388-410](#)  
21
- 22 8. [Freemantle J, Officer K, McAullay D, et al. Australian Indigenous Health—](#)  
23  
24 [Within an International Context, . Darwin: Cooperative Research Centre for](#)  
25  
26 [Aboriginal Health, 2007.](#)  
27
- 28 9. [Carson KV, Robertson TA, Brinn MP, et al. Tobacco use, cessation and](#)  
29  
30 [prevention for Indigenous populations: Review of current evidence and future](#)  
31  
32 [perspectives. In: Jackson OT EK, ed. Health Disparities: Epidemiology.](#)  
33  
34 [Racial/Ethnic and Socioeconomic Risk Factors and Strategies for Elimination.](#)  
35  
36 [New York: Nova Science Publishers, 2013:1-38.](#)  
37
- 38 10. Brady M. Historical and cultural roots of tobacco use among Aboriginal  
39  
40 and Torres Strait Island people. [Aust NZ J Public Health 2002;26\(2\):120-4.](#)  
41
- 42 11. Thomas DP, Briggs V, Anderson I, et al. The social determinants of being  
43  
44 an Indigenous non-smoker. [Aust NZ J Public Health 2008;32\(2\):110-6.](#)  
45
- 46 12. Paradies Y, Harris R, & Anderson I. The Impact of Racism on Indigenous  
47  
48 Health in Australia and Aotearoa: Towards a Research Agenda, Discussion Paper  
49  
50 No. 4. Darwin: Cooperative Research Centre for Aboriginal Health 2008.  
51
- 52 13. Gould GS, Munn J, Watters T, et al. Knowledge and views about maternal  
53  
54 tobacco smoking and barriers for cessation in Aboriginal and Torres Strait  
55  
56  
57  
58  
59  
60

Formatted: Font: Not Italic

Formatted: Font: Not Italic

1  
2  
3  
4  
5  
6 Islanders: A systematic review and meta-ethnography. *Nicotine Tob Res*  
7  
8 2013;15(5):863-74.

Formatted: Font: Not Italic

10 ~~14~~. Johnston V, Thomas DP. Smoking behaviours in a remote Australian  
11  
12 Indigenous community: The influence of family and other factors. *Soc Sci Med*  
13  
14 2008;67(11):1708-16.

Formatted: Font: Not Italic

16 ~~15~~. Passey M, Gale JT, Sanson-Fisher RW. "It's almost expected": rural  
17  
18 Australian Aboriginal women's reflections on smoking initiation and  
19  
20 maintenance: a qualitative study. *BMC Womens Health* 2011;11(55).

Formatted: Font: Not Italic

22 16. Winstanley M, van der Sterren A, Knoche D. Chapter 8. Tobacco use  
23  
24 among Aboriginal peoples and Torres Strait Islanders in Scollo MM and  
25  
26 Winstanley MH, eds. Tobacco in Australia: Facts and issues. 4th edn. Melbourne:  
27  
28 Cancer Council Victoria; 2012.

30 ~~17~~. Johnston F, Beecham R, Dalgleish P, et al. The Maningrida: 'Be Smoke  
31  
32 Free' project. *Health Promot J Austr* 1998;8(1):12-17.

Formatted: Font: Not Italic

34 18. Zuo Y, Minniecon S, Hua M. 'If you want your life to end bad, go ahead  
35  
36 and smoke': a focus group study of Aboriginal and Torres Strait Islander young  
37  
38 people's attitudes and knowledge towards smoking. *Health Promot J Austr*  
39  
40 2004;15(1): 82-83.

Formatted: Font: Not Italic

42 ~~19~~. Stewart HS, Bowden JA, Bayly MC, et al. Potential effectiveness of specific  
43  
44 anti-smoking mass media advertisements among Australian Indigenous  
45  
46 smokers. *Health Educ Res* 2011;26(6):961-75.

Formatted: Font: Not Italic

48 20. Gould GS, Watt K, Stevenson L, et al. Developing anti-tobacco messages for  
49  
50 Australian Aboriginal and Torres Strait Islander peoples: evidence from a  
51  
52 national cross-sectional survey. *BMC Public Health* 2014;14(1): 250. doi:  
53  
54 10.1186/1471-2458-14-250

Formatted: Font: Not Italic

Formatted: Font: Not Italic

1  
2  
3  
4  
5  
6 21. Boyle T, Shepherd CCJ, Pearson G, et al. Awareness and impact of the  
7 'Bubblewrap' advertising campaign among Aboriginal smokers in Western  
8 Australia. Tob Control 2010;19(1):83-86

Formatted: Font: Not Italic

9  
10  
11  
12 22. Ivers R, Castro A, Parfitt D, et al. Television and delivery of health  
13 promotion programs to remote Aboriginal communities. Health Promot J Austr  
14 2005;16(2):155-58

15  
16  
17  
18 23. Vogeltanz-Holm N, Holm J, White Plume J, et al. Confirmed Recall and  
19 Perceived Effectiveness of Tobacco Countermarketing Media in Rural Youth.  
20 Prev Sci 2009;10(4):325-34 doi: 10.1007/s11121-009-0134-0.

21  
22  
23  
24 24. Grigg M, Waa A, Bradbrook SK. Response to an Indigenous smoking  
25 cessation media campaign: it's about whanau. Aust NZ J Public Health  
26 2008;32(6):559-64

27  
28  
29  
30 25. Gould GS, McEwen A, Watters T, et al. Should anti-tobacco media  
31 messages be culturally targeted for Indigenous populations? A systematic review  
32 and narrative synthesis. Tob Control 2013;22(4):e7 doi:  
33 10.1136/tobaccocontrol-2012-050436

34  
35  
36  
37  
38 26. Australian Government. Indigenous Anti-Smoking Campaign: Break the  
39 Chain - Quantitative Campaign Effectiveness: Research - Executive Summary.  
40 Secondary Indigenous Anti-Smoking Campaign: Break the Chain - Quantitative  
41 Campaign Effectiveness: Research - Executive Summary 30 May 2012 October  
42 2011.

43  
44  
45  
46  
47 [http://www.quitnow.gov.au/internet/quitnow/publishing.nsf/Content/ntc-](http://www.quitnow.gov.au/internet/quitnow/publishing.nsf/Content/ntc-break-the-chain)  
48 [break-the-chain.](http://www.quitnow.gov.au/internet/quitnow/publishing.nsf/Content/ntc-break-the-chain)

- 1  
2  
3  
4  
5  
6 [27. Bramley D, Riddell T, Whittaker R, et al. Smoking cessation using mobile](#)  
7 [phone text messaging is as effective in Maori as non-Maori. N Z Med J](#)  
8 [2005;118:1216](#)  
9  
10  
11 [28. Wood L, France K, Hunt K, et al. Indigenous women and smoking during](#)  
12 [pregnancy: Knowledge, cultural contexts and barriers to cessation. Soc Sci Med](#)  
13 [2008;66\(11\):2378-89 doi: 10.1016/j.socscimed.2008.01.024](#)  
14  
15  
16 [29. Gilligan C, Sanson-Fisher RW, D'Este C, et al. Knowledge and attitudes](#)  
17 [regarding smoking during pregnancy among Aboriginal and Torres Strait](#)  
18 [Islander women. Med J Aust 2009;190\(10\):557-61](#)  
19  
20  
21  
22 [30. Passey M, Gale J, Holt B, et al. Stop smoking in its tracks: understanding](#)  
23 [smoking by rural Aboriginal women: Cairns, Qld: The 10th National Rural Health](#)  
24 [Conference, 2009.](#)  
25  
26  
27  
28 [31. Douglas TA, Buettner PG, Whitehall J. Maternal awareness of sudden](#)  
29 [infant death syndrome in North Queensland, Australia: An analysis of infant care](#)  
30 [practices. J Paediatr Child Health 2001;37\(5\):441-45](#)  
31  
32  
33  
34 [32. Wilson G. What do Aboriginal women think is good antenatal care?:](#)  
35 [consultation report Alice Springs, N. T.: Cooperative Research Centre for](#)  
36 [Aboriginal Health, 2009.](#)  
37  
38  
39  
40  
41  
42 [33. Heath DL, Panaretto K, Manassis V, et al. Factors to consider in smoking](#)  
43 [interventions for indigenous women. Aust J Prim Health 2006;12\(2\): 131-36 doi:](#)  
44 [10.1071/PY06032](#)  
45  
46  
47  
48 [Could GS. A Snapshot of the Development of Anti-Tobacco Messages for](#)  
49 [Aboriginal and Torres Strait Islander Communities—Report from an Australian](#)  
50 [National Survey. Cairns: James Cook University; 2013.34](#)  
51  
52  
53  
54  
55  
56  
57  
58  
59  
60

1  
2  
3  
4  
5  
6  
7  
8  
9  
10  
11  
12  
13  
14  
15  
16  
17  
18  
19  
20  
21  
22  
23  
24  
25  
26  
27  
28  
29  
30  
31  
32  
33  
34  
35  
36  
37  
38  
39  
40  
41  
42  
43  
44  
45  
46  
47  
48  
49  
50  
51  
52  
53  
54  
55  
56  
57  
58  
59  
60

15. Gould GS, Munn J, Avuri S, et al. "Nobody smokes in the house if there's a new baby in it": Aboriginal perspectives on tobacco smoking in pregnancy and in the household in regional NSW Australia. *Women Birth* 2013;26(4):246-53.

Formatted: Font: Not Italic

35

16. Passey M, D'Este CA, Stirling JM, et al. Factors associated with antenatal smoking among Aboriginal and Torres Strait Islander women in two jurisdictions. *Drug Alcohol Rev* 2012;31(5):608-16.

Formatted: Font: Not Italic

~~36~~17. [Patten CA, Windsor RA, Renner CC, et al. Feasibility of a tobacco cessation intervention for pregnant Alaska Native women. \*Nicotine Tob Res\* 2010;12\(2\):79-87](#)

37. Ivers R. Anti-tobacco programs for Aboriginal and Torres Strait Islander people In: *Closing the Gap Clearinghouse* AloHaW, editor. Canberra: Australian Government; 2011.

~~38~~18. Australian Department of Health and Ageing. Developmental Research to inform the National Action to Reduce Smoking Rates Social Marketing Campaign. 2010 [updated 2010, Dec 7, 2011, November 20]; Available from: <http://www.health.gov.au/internet/ctg/publishing.nsf/Content/development-market-research>.

~~39~~19. Witte K, Allen M. A Meta-Analysis of Fear Appeals: Implications for Effective Public Health Campaigns. *Health Educ Behav* 2000;27(5):591-615.

Formatted: Font: Not Italic

~~40~~20. Witte K, Cameron KA, McKeon JK, et al. Predicting Risk Behaviors: Development and Validation of a Diagnostic Scale. *J Health Commun* 1996;1:317-41.

Formatted: Font: Not Italic

21. Witte K, Meyer G, Martell D. *Effective health risk messages: a step-by-step guide*. Thousand Oaks, CA: Sage Publications; 2001.



1  
2  
3  
4  
5  
6 [4222](#). Bandura A. Health Promotion by Social Cognitive Means. *Health Educ Behav* 2004;31:143-64.

Formatted: Font: Not Italic

9  
10 [4323](#). Maloney EK, Lapinski MK, Witte K. Fear Appeals and Persuasion: A Review and Update of the Extended Parallel Process Model. *Soc Personal Psychol Compass* 2011;5(4):206-19.

Formatted: Font: Not Italic

14  
15  
16 [4424](#). Wong NCH, Cappella JN. Antismoking Threat and Efficacy Appeals: Effects on Smoking Cessation Intentions for Smokers with Low and High Readiness to Quit. *J Appl Commun Res* 2009;37(1):1-20.

Formatted: Font: Not Italic

20  
21  
22 [4525](#). Guidry JJ, Fagan P, Walker V. Cultural sensitivity and readability of breast and prostate printed cancer education materials targeting African Americans. *J Natl Med Assoc* 1998;90(3):165-9.

Formatted: Font: Not Italic

26  
27  
28 [4626](#). Lee HS, Park JS. Cultural orientation and the persuasive effects of fear appeals: The case of anti-smoking public service announcements. *J of Med Marketing* 2012;12(2):73-80.

Formatted: Font: Not Italic

30  
31  
32 [4727](#). Murray-Johnson L, Witte K, Boulay M, et al. Using health education theories to explain behavior change: A cross-country analysis. *Int Q Community Health Educ* 2006;25(1-2):185-207.

Formatted: Font: Not Italic

36  
37  
38 [4828](#). Muthusamy N, Levine TR, Weber R. Scaring the Already Scared: Some Problems With HIV/AIDS Fear Appeals in Namibia. *Journal of Communication* 2009;59(2):317-44.

Formatted: Font: Not Italic

42  
43  
44 [4929](#). Smith RA, Ferrara M, Witte K. Social Sides of Health Risks: Stigma and Collective Efficacy. *Health Commun* 2007-2007/04/10;21(1):55-64.

Formatted: Font: Not Italic

48  
49  
50 [5030](#). Sobre-Denton M, Hart D. Mind the gap: Application-based analysis of cultural adjustment models. *Int J Intercult Relat* 2008;32(6):538-52.

Formatted: Font: Not Italic

Formatted: Font: Not Italic

1  
2  
3  
4  
5  
6 [5131](#). Terblanche-Smit M, Terblanche NS. Race and attitude formation in  
7 HIV/Aids fear advertising. *J Bus Res* 2010;63(2):121-5.

Formatted: Font: Not Italic

10 [5232](#). Witte K, Berkowitz JM, Lillie JM, et al. Radon Awareness and Reduction  
11 Campaigns for African Americans: A Theoretically Based Evaluation. *Health Educ*  
12 *Behav* 1998;25(3):284-303.

Formatted: Font: Not Italic

16 [5333](#). Witte K. A Theoretically Based Evaluation of HIV / AIDS Prevention  
17 Campaigns Along the Trans-Africa Highway in Kenya. *J Health Commun*  
18 1998;3(4):345-63.

Formatted: Font: Not Italic

22 [5434](#). West R. Theory of Addiction. Oxford: Blackwell; 2006.

24 [5535](#). West R. The multiple facets of cigarette addiction and what they mean for  
25 encouraging and helping smokers to stop. *COPD* 2009;6(4):277-83.

Formatted: Font: Not Italic

28 [5636](#). Cattaruzza MS, West R. Why do doctors and medical students smoke  
29 when they must know how harmful it is? *Eur J Public Health* 2013;23 (2): 188-  
30 189.

Formatted: Font: Not Italic

Formatted: Font: Not Italic

34 [57](#). [Berry J, Poortinga Y, Segall M, et al. Cross-cultural psychology: research  
35 and applications. Chapter 1: Introduction to Cross Cultural Psychology, p 1-15.  
36 2nd ed. Cambridge: Cambridge University Press, 2002.](#)

Formatted: Font: Not Italic

40 [58](#). [Drew N, Adams Y, Walker R. Issues in Mental Health Assessment with  
41 indigenous Australians. In: Purdie N, Dudgeon P, Walker R, eds. Working  
42 Together: Aboriginal and Torres Strait Islander Mental Health and Wellbeing  
43 Principles and Practice. Canberra: Department of Health and Ageing, 2010.](#)

48 [5937](#). Altman D. Practical statistics for medical research. London: Chapman and  
49 Hall; 1991.

52 [60](#). [Tabachnik BG, & Fidel LS. Using Multivariate Statistics \(6th Edition\):  
53 Pearson, 2013](#)

Formatted: Font: Not Italic

1  
2  
3  
4  
5  
6 [6138](#). ABS. National Aboriginal and Torres Strait Islander Social Survey 2008.  
7  
8 Canberra: Australian Bureau of Statistics; 2009.

9  
10 <http://www.abs.gov.au/ausstats/abs@nsf/mf/4714.0/>

11  
12 [6239](#). Fidler J, Shahab L, West R. Strength of urges to smoke as a measure of  
13 severity of cigarette dependence: comparison with the Fagerstrom Test for  
14 Nicotine Dependence and its components. *Addiction* 2011;106(3):631-8.

Formatted: Font: Not Italic

15  
16 [6340](#). Fidler JA, Shahab L, West O, et al. 'The smoking toolkit study': a national  
17 study of smoking and smoking cessation in England. *BMC Public Health*  
18 2011;11(479):479.

Formatted: Font: Not Italic

19  
20 [6441](#). Kotz D, Brown J, West R. Predictive validity of the Motivation To Stop  
21 Scale (MTSS): a single-item measure of motivation to stop smoking. *Drug Alcohol*  
22 *Depend* 2013;128(1-2):15-9.

Formatted: Font: Not Italic

23  
24 [65](#). Thomas DR. A General Inductive Approach for Analyzing Qualitative  
25 Evaluation Data. *Am J Eval* 2006;27(2):237-46 doi:  
26 10.1177/1098214005283748[published Online First: Epub Date]].

27  
28 [4662](#). NHMRC. Values and Ethics: Guidelines for Ethical Conduct in Aboriginal  
29 and Torres Strait Islander Health Research. Canberra, ACT: Commonwealth of  
30 Australia; 2003.

31  
32 [6743](#). Centre for Health Advancement - Population Health Division. The NSW  
33 SmokeCheck Aboriginal Tobacco Prevention Project 2007 - 2008 final report:  
34 NSW Department of Health 2010.

35  
36 [6844](#). Campbell S BI, Swinbourne A, Cadet-James Y, et al. Stages of Change,  
37 Smoking Behaviour and Readiness to Quit in a Large Sample of Indigenous  
38 Australians Living in Eight Remote North Queensland Communities. *Int J Environ*  
39 *Res Public Health* 2013;10(4):1562-71.

Formatted: Font: Not Italic

1  
2  
3  
4  
5  
6 69. Hettaema JE, Hendricks PS. Motivational interviewing for smoking  
7 cessation: a meta-analytic review. J Consult Clin Psychol 2010;78(6):868-84 doi:  
8 10.1037/a0021498.

9  
10  
11 7045. Chamberlain C, O'Mara-Eves A, Oliver S, et al. Psychosocial interventions  
12 for supporting women to stop smoking in pregnancy. Cochrane Database Syst  
13 Rev 2013. Issue 10. Art. No.: CD001055. doi:  
14 10.1002/14651858.CD001055.pub4

15  
16 Lumley J, Chamberlain C, Dowswell, T, et al.  
17 Interventions for promoting smoking cessation during pregnancy. Cochrane  
18 Database Syst Rev 2009(Issue 4 Art. No.: CD001055.  
19 doi:10.1002/14651858.CD001055.pub2.).

20  
21 71. Passey M, D'Este CA, Sanson-Fisher R. Knowledge, attitudes and other  
22 factors associated with assessment of tobacco smoking among pregnant  
23 Aboriginal women by health care providers: a cross-sectional survey. BMC Public  
24 Health 2012;12(165) doi: 10.1186/1471-2458-12-165.

25  
26 7246. Barry AE, Chaney B, Piazza-Gardner AK, et al. Validity and Reliability  
27 Reporting Practices in the Field of Health Education and Behavior: A Review of  
28 Seven Journals. Health Educ Behav 2013; Apr 3. doi:  
29 10.1177/1090198113483139

30  
31 7347. Stephens A, Bohanna I, Graham D, et al. Screening and assessment  
32 instruments for use in Indigenous-specific alcohol and drug treatment  
33 rehabilitation. Journal of Tropical Psychology 2013;3. doi: 10.1017/jtp.2013.2

Formatted: Font: Not Italic

Formatted: Font: Not Italic

Formatted: Font: Not Italic

Formatted: Font: Not Bold

Formatted: Font: Not Italic

Formatted: Font: Not Italic

## **Appendix 1: Risk Behaviour Diagnosis Scale (RBD) and Smoking Risk Assessment Target (SRAT)**

Readability formulas indicate the Flesch-Kincaid Grade Level for the whole survey, the RBD and SRAT are grade 5, and the SMOG index is grade 4. The estimated reading age is aged 8-10 years, and considered 'easy to read'.

### **Risk Behaviour Diagnosis Scale**

Participants are asked to indicate which response applies best to them depending how strongly they agree or disagree with the statements. (The statements were mixed-up and embedded in a section with others assessing beliefs on fear control responses and protective responses).

|                                                                                                 | <i>Strongly Agree</i> | <i>Agree</i> | <i>Neither/ Not sure</i> | <i>Disagree</i> | <i>Strongly Disagree</i> |
|-------------------------------------------------------------------------------------------------|-----------------------|--------------|--------------------------|-----------------|--------------------------|
| <i>Response Efficacy</i>                                                                        |                       |              |                          |                 |                          |
| Stopping smoking prevents serious sickness or disease (such as heart or lung disease or cancer) | 5                     | 4            | 3                        | 2               | 1                        |
| Giving up smoking helps avoid serious sickness or disease                                       | 5                     | 4            | 3                        | 2               | 1                        |
| If I stop smoking I am less likely to get a serious sickness or disease                         | 5                     | 4            | 3                        | 2               | 1                        |
| <i>Self-efficacy</i>                                                                            |                       |              |                          |                 |                          |
| I am confident I can stop smoking                                                               | 5                     | 4            | 3                        | 2               | 1                        |
| I am able to stop smoking                                                                       | 5                     | 4            | 3                        | 2               | 1                        |
| It is easy to stop smoking                                                                      | 5                     | 4            | 3                        | 2               | 1                        |
| <i>Susceptibility to threat</i>                                                                 |                       |              |                          |                 |                          |
| It is likely that I will get ill from smoking                                                   | 5                     | 4            | 3                        | 2               | 1                        |
| Smoking could possibly affect my health                                                         | 5                     | 4            | 3                        | 2               | 1                        |
| I believe I am seriously at risk of getting ill from smoking                                    | 5                     | 4            | 3                        | 2               | 1                        |
| <i>Severity of threat</i>                                                                       |                       |              |                          |                 |                          |
| Smoking is harmful to health                                                                    | 5                     | 4            | 3                        | 2               | 1                        |
| Smoking can severely affect health                                                              | 5                     | 4            | 3                        | 2               | 1                        |
| The health effects of smoking are of serious concern                                            | 5                     | 4            | 3                        | 2               | 1                        |

### **Smoking Risk Assessment Target (SRAT) – adapted from the Risk Acceptance Ladder (with permission from Cattaruzza and West)**

Participants are asked to indicate which **one** of the following statements is closest to their position when it comes to smoking. This is explained by the interviewer as a big target with question A on the outside ring (see picture below). 'As you move through the rings you get closer to the target of quitting (response A is on the outer ring and as you move further down the list you get closer to the centre. Response L is near the 'bulls-eye'). Your response to this question helps us understand the phases on the journey to quitting and where you personally may be up to.'

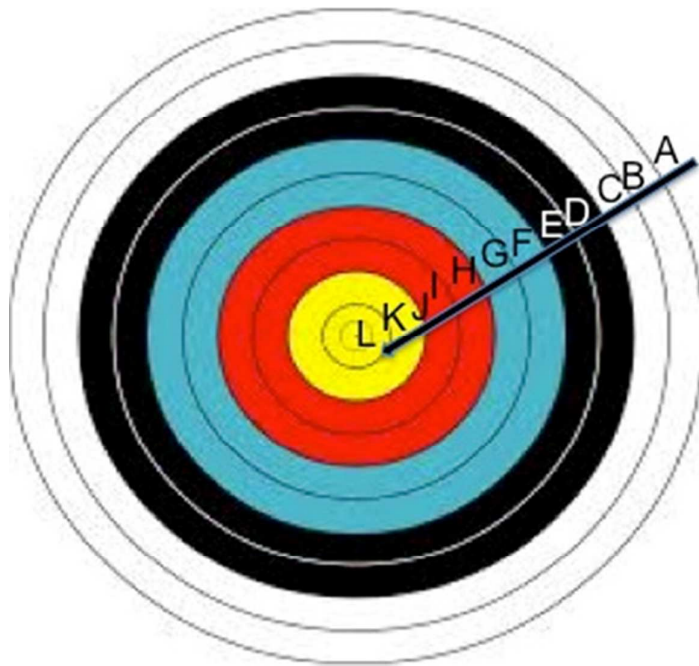

- 1  
2  
3  
4  
5  
6  
7  
8  
9  
10  
11  
12  
13  
14  
15  
16  
17  
18  
19  
20  
21  
22  
23  
24  
25  
26  
27  
28  
29  
30  
31  
32  
33  
34  
35  
36  
37  
38  
39  
40  
41  
42  
43  
44  
45  
46  
47  
48  
49  
50  
51  
52  
53  
54  
55  
56  
57  
58  
59  
60
- A. I have never heard that smoking can be harmful
  - B. I have heard that smoking can be harmful, but its too scary to think about
  - C. I have heard that smoking can be harmful, but I think the risk is exaggerated
  - D. I accept that smoking can be harmful, but I do not think it will be for me
  - E. I accept that smoking could be harmful for me, but I do not care *very much*
  - F. I care that I could be harmed by smoking, but I think the risk is worth it
  - G. I do not think the risk of smoking is worth it, but there is no point in trying to stop because the damage has been done
  - H. I do not think the risk of smoking is worth it, but I do not think I can stop
  - I. I accept that smoking can be harmful, and the danger is part of the attraction
  - J. I accept that smoking can be harmful, but I would feel shame if I failed at quitting
  - K. I care about the risks of smoking and plan to try to stop, but it is not a priority at the moment
  - L. I care about the risks of smoking, and definitely intend to try to stop soon

NB: Items B and J were additions to the original Risk Acceptance Ladder

1  
2  
3  
4  
5  
6  
7  
8  
9  
10  
11  
12  
13  
14  
15  
16  
17  
18  
19  
20  
21  
22  
23  
24  
25  
26  
27  
28  
29  
30  
31  
32  
33  
34  
35  
36  
37  
38  
39  
40  
41  
42  
43  
44  
45  
46  
47  
48  
49  
50  
51  
52  
53  
54  
55  
56  
57  
58  
59  
60

For peer review only
